# Supplementary material for: Preparation of monopodal and bipodal aluminum surface species by selective protonolysis of highly reactive [AlH3(NMe2Et)] on silica
Source: Royal Society of Chemistry journal article supplement (doi:10.1039/c7dt02575k), 2017-01-01
Supplement: c7dt02575k1.pdf [file c7dt02575k1.pdf]

# Preparation of monopodal and bipodal aluminum surface species by selective protonolysis of highly reactive [AlH<sub>3</sub>NMe<sub>2</sub>Et] on silica

D. W. Sauter, V. Chiari, N. Aykac, S. Bouaouli, L. Perrin, L. Delevoye, R. M. Gauvin, K. C. Szeto, C. Boisson, M. Taoufik

## Electronic Supplementary Information

|                                                                                                                                    |   |
|------------------------------------------------------------------------------------------------------------------------------------|---|
| <b>General procedures</b>                                                                                                          | 2 |
| <b>Preparation and Characterization of silica and material 1 and 2</b>                                                             | 3 |
| <b>Figure S1:</b> DRIFT spectra of (a) Sylopol-700 and (b) material 2                                                              | 3 |
| <b>Figure S2:</b> <sup>1</sup> H and <sup>13</sup> C MAS NMR spectra of 1                                                          | 4 |
| <b>Table S1:</b> Mass Balance Analysis Data for 1 and 2                                                                            | 4 |
| <b>Scheme S1:</b> Formation of bipodal species by opening of siloxane bridges of SiO <sub>2-700</sub>                              | 4 |
| <b>Figure S3:</b> <sup>27</sup> Al echo MAS NMR spectrum of 1 and best fit simulation                                              | 5 |
| <b>Figure S4:</b> 2D <sup>1</sup> H- <sup>27</sup> Al D-HMQC and <i>J</i> -HMQC-filtered <sup>1</sup> H MAS NMR spectra of 1 and 2 | 6 |
| <b>Figure S5:</b> <sup>1</sup> H, <sup>13</sup> C CP and <sup>29</sup> Si CP MAS NMR spectra of 2                                  | 6 |
| <b>Figure S6:</b> <sup>27</sup> Al echo MAS NMR spectrum of 1 and 2                                                                | 7 |
| <b>Figure S7:</b> Energy profiles                                                                                                  | 7 |
| <b>Computational Details</b>                                                                                                       | 8 |
| <b>References</b>                                                                                                                  | 8 |
| <b>Cartesian Coordinates and energies of optimized structures (minima and TS)</b>                                                  | 9 |

## General Procedures.

All experiments were carried out under controlled atmosphere, using Schlenk and glove box techniques for the organometallic synthesis. For the synthesis and treatments of the surface species, reactions were carried out using high-vacuum lines (1.34 Pa) and glove box techniques. Benzene was distilled on Na-benzophenone and degassed through freeze pump thaw cycles. Infrared spectra were recorded on a Nicolet Magna 5700 FT spectrometer equipped with a cell designed for *in situ* reactions under controlled atmosphere. Infrared spectra (DRIFT) were recorded on a Nicolet Magna 6700 FT spectrometer equipped with a cell under controlled atmosphere. Elemental analyses were performed at the Mikroanalytisches Labor Pascher, Remagen (Germany).  $^1\text{H}$  MAS and  $^{13}\text{C}$  CP-MAS solid-state NMR spectra were recorded on a Bruker DSX-300 spectrometer. For specific studies (see below),  $^1\text{H}$  MAS and  $^{13}\text{C}$  CP-MAS solid-state NMR spectra were recorded on Bruker Avance-500 spectrometers with a conventional double-resonance 4 mm CP-MAS probe and on a Avance III 800 spectrometer ( $^1\text{H}$ : 800.13 MHz,  $^{13}\text{C}$ : 201.21 MHz,  $^{27}\text{Al}$ : 208.50 MHz). The samples were introduced under Ar in a zirconia rotor, which was then tightly closed. In all experiments, the rotation frequency was set to 10 kHz unless otherwise specified. Chemical shifts were given with respect to TMS as external reference for  $^1\text{H}$  and  $^{13}\text{C}$  NMR.  $^{27}\text{Al}$  MAS NMR spectra at 18.8 T were acquired at a spinning frequency of 20 kHz in 3.2 mm rotors. D-HMQC experiments were set up with a  $^{27}\text{Al}$  spin echo selective to the central transition, with pulses of 7.25 and 14.5  $\mu\text{s}$ , and a  $^1\text{H}$   $\pi/2$  pulse of 3  $\mu\text{s}$  on either side of the  $^{27}\text{Al}$   $\pi$  pulse. A recycling delay of 2 s was used. The number of scans for each  $t_1$  increment was set to 2048. The SR4<sup>2</sup><sub>1</sub> dipolar recoupling scheme was applied for 500  $\mu\text{s}$ . The  $^1\text{H}$  MAS NMR spectrum acquired with a *J*-HMQC  $^{27}\text{Al}$  filtering was obtained with recycling delay of 1 ms.

## Preparation and Characterization of silica and materials 1 and 2

Sylopol SY2408 Silica from Grace Davidson with a specific area of  $300 \text{ m}^2 \cdot \text{g}^{-1}$  ((Pore volume:  $1.55 \text{ mL} \cdot \text{g}^{-1}$ ; particle size:  $40 \mu\text{m}$ ) was selected as a support for grafting of Al compounds. Isolated and vicinal surface silanols were dehydroxylated under high vacuum at  $473 \text{ K}$  (Sylopol<sub>200</sub>) or  $973 \text{ K}$  (Sylopol<sub>700</sub>) for 15 h. The titration by EtMgBr showed that the silica supports presented  $1.62 \text{ mmol}_{\text{OH}} \cdot \text{g}^{-1}$  (Sylopol<sub>200</sub>) and  $0.6 \text{ mmol}_{\text{OH}} \cdot \text{g}^{-1}$  (Sylopol<sub>700</sub>) respectively.

Using the double Schlenk technique, Sylopol<sub>700</sub> and Sylopol<sub>200</sub> were treated with excess  $[(\text{AlH}_3)(\text{EtMe}_2\text{N})]$  in benzene (10 mL) for 2 h at room temperature. After repeated washings with benzene (10 mL), followed by evacuation of the volatile under high vacuum ( $10^{-5} \text{ mmHg}$ ), **1** and **2** were afforded as a white powder and characterized by DRIFTS, solid-state NMR spectroscopy and mass-balance analysis.

Hydrolysis of the synthesized materials was performed in a closed glass vessel with a determined volume (typically 500 mL). A known quantity of the sample (about 35 mg) was introduced into the glass vessel in the glovebox. Then, the vessel was evacuated under high vacuum and an excess of oxygen-free water vapor was introduced at ambient temperature. The hydrogen evolved was quantified by a calibrated GC (HP 6890) equipped with 15 m HP PLOT MoleSieve  $5 \text{ \AA}$  column and TCD.

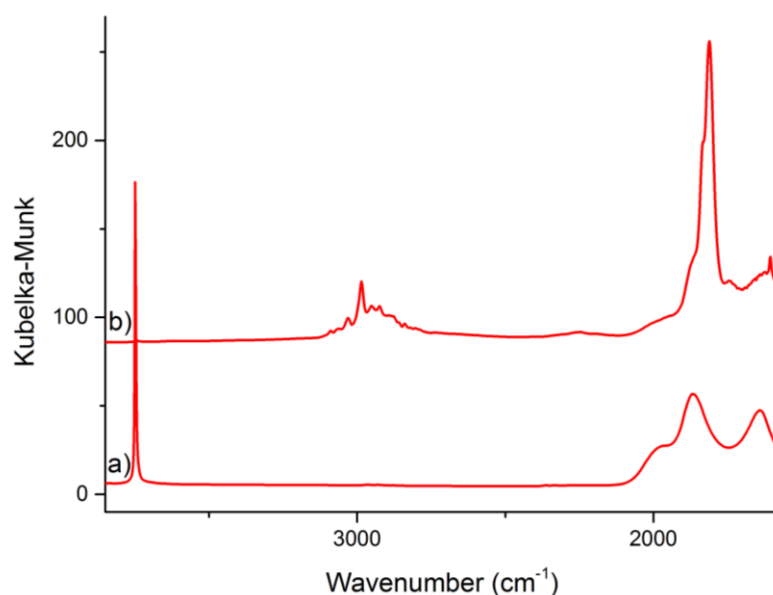

**Figure S1.** DRIFT spectra of (a) Sylopol-700 and (b) material **2**

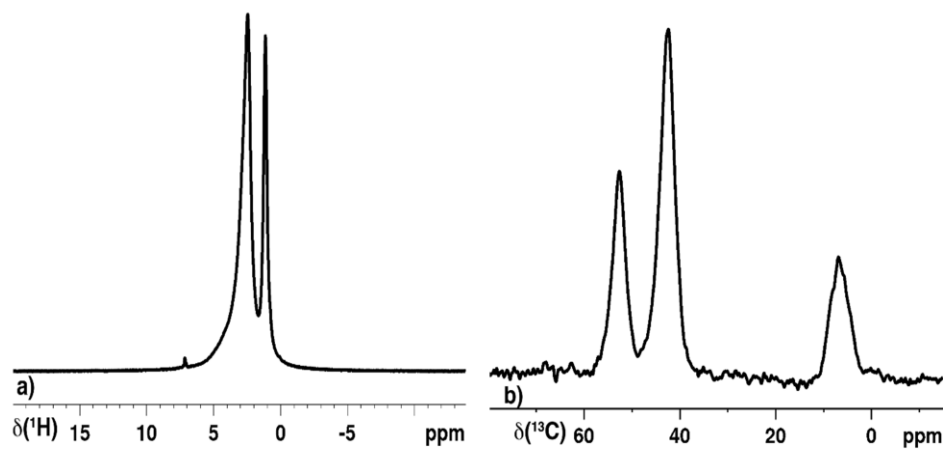

**Figure S2.**  $^1\text{H}$  (a) and  $^{13}\text{C}$  CP (b) MAS NMR spectra **1** (18.8 T).

**Table S1.** Mass Balance Analysis Data for **1** and **2**

| Material | wt % Al <sup>[a]</sup> | wt %C <sup>[a]</sup> | wt %N <sup>[a]</sup> | C/N | C/Al | N/Al | H <sub>2</sub> /Al Hydrolysis <sup>b</sup> |
|----------|------------------------|----------------------|----------------------|-----|------|------|--------------------------------------------|
| <b>1</b> | 2.69                   | 4.71                 | 1.45                 | 3.8 | 4.4  | 1.1  | 1.1                                        |
| <b>2</b> | 1.89                   | 3.03                 | 1.12                 | 3.0 | 3.6  | 1.2  | 1.5                                        |

<sup>a</sup> Percentage determined by elemental analysis. The error is <5%. <sup>b</sup> See the Experimental Section.

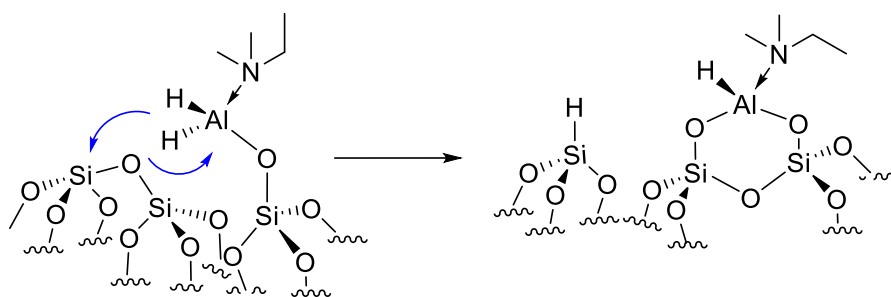

**Scheme S1.** Formation of bipodal species by opening of siloxane bridges of  $\text{SiO}_{2-700}$

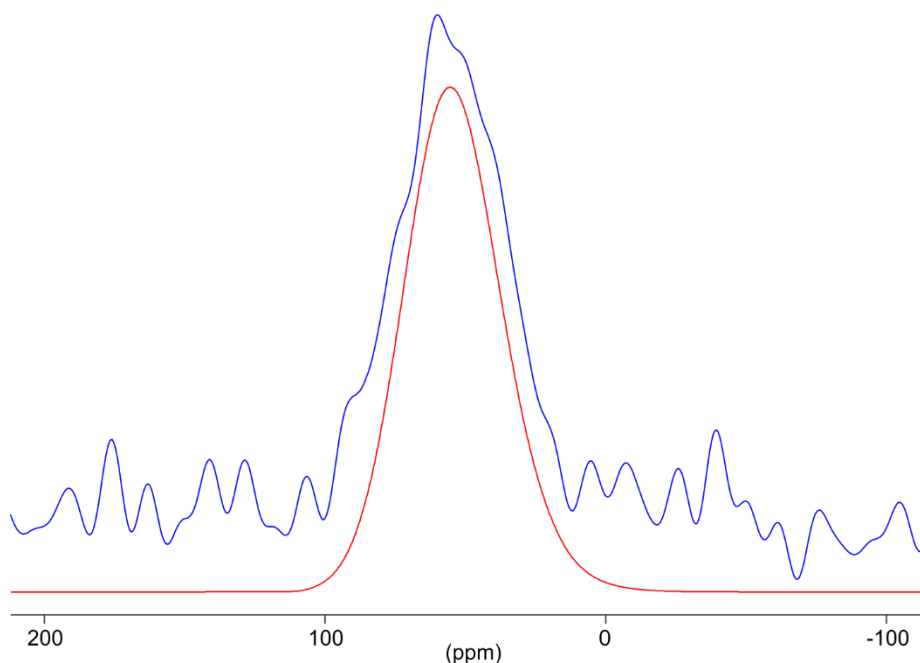

**Figure S3.**  $^{27}\text{Al}$  echo MAS NMR spectrum of **1** (blue trace, 18.8 T, spinning speed 20 kHz) and best fit simulation (red trace, from the Dmfit program<sup>1a</sup>, with a CzSimple model, with chemical shift of 65 ppm, quadrupolar coupling constant of 8.2 MHz, chemical shift full width at half maximum of 35 ppm)

The lineshape of the  $^{27}\text{Al}$  signal is non-symmetrical, which is often related to either quadrupolar coupling constant ( $C_Q$ ) and/or chemical shift (CS) distributions. A typical approach to get best-fit simulations of such spectra is by using the Czjzek model.<sup>1b</sup> In the present case, combination of both  $C_Q$  and CS Czjzek distributions must be resorted to, in order to account for the  $^{27}\text{Al}$  NMR signal dissymmetry. Thus, the  $^{27}\text{Al}$  MAS NMR signal of **1** corresponds to a single type of Al center, featuring CS of 65 ppm (distinct from the signal maximum, due to quadrupolar coupling influence), with a distribution of about 35 ppm, and a  $C_Q$  of about 8 MHz). Such large chemical shift distribution can be directly linked to the geometrical parameters (bond distances and angles) distribution of the Si-O-Al-O-Si framework, due to silica surface heterogeneity.

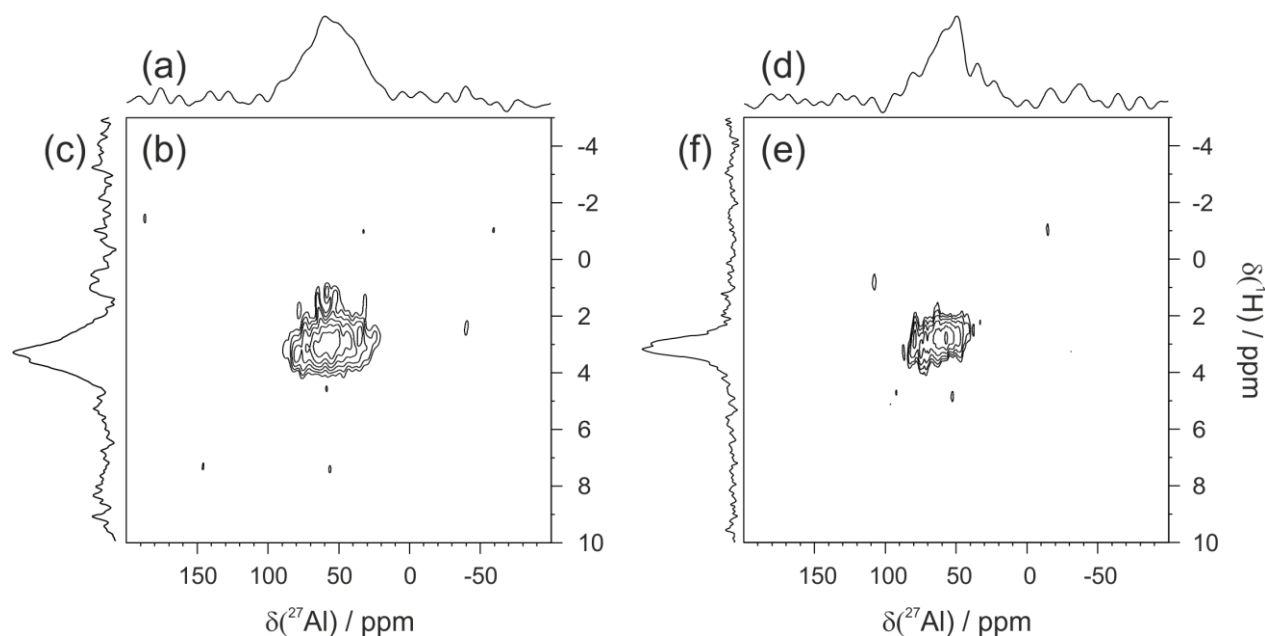

**Figure S4** (a)  $^{27}\text{Al}$  echo MAS NMR, (b)  $^1\text{H}$ - $^{27}\text{Al}$  D-HMQC MAS NMR and (c)  $^1\text{H}$  MAS NMR recorded with a  $J$ -HMQC  $^{27}\text{Al}$  filter of **1**; (d)  $^{27}\text{Al}$  echo MAS NMR, (e)  $^1\text{H}$ - $^{27}\text{Al}$  D-HMQC MAS NMR and (f)  $^1\text{H}$  MAS NMR recorded with a  $J$ -HMQC  $^{27}\text{Al}$  filter of **2** (18.8 T, spinning speed 20 kHz)

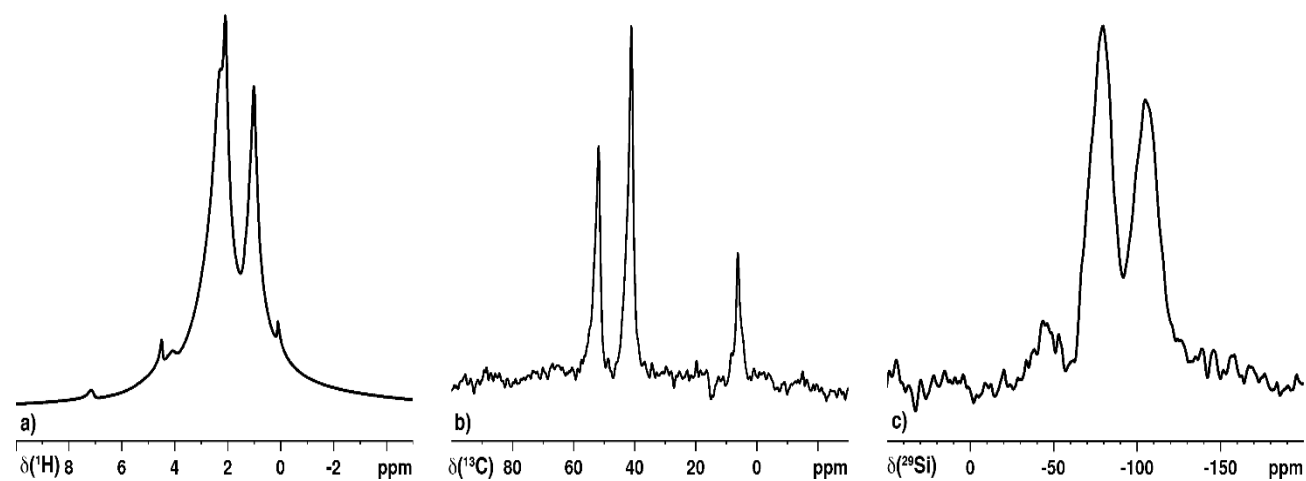

**Figure S5.**  $^1\text{H}$  MAS (a)  $^{13}\text{C}$  CP/MAS-NMR (b)  $^{29}\text{Si}$  CP/MAS-NMR (c) of **2**

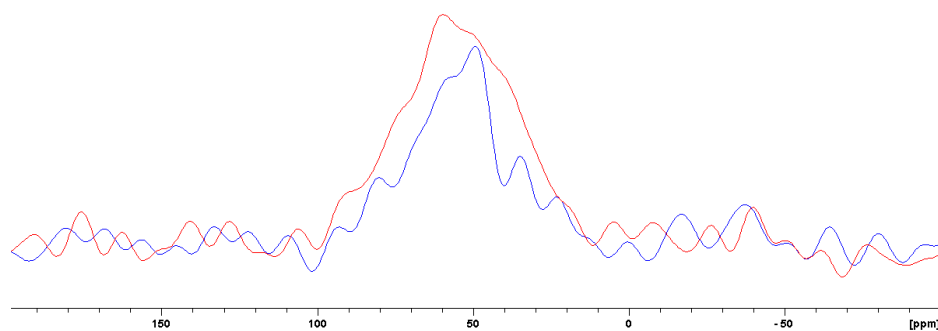

**Figure S6.**  $^{27}\text{Al}$  echo MAS NMR spectrum of **1** (red trace) and **2** (blue trace) (18.8 T, spinning speed 20 kHz)

**Figure S7.** Energy profiles

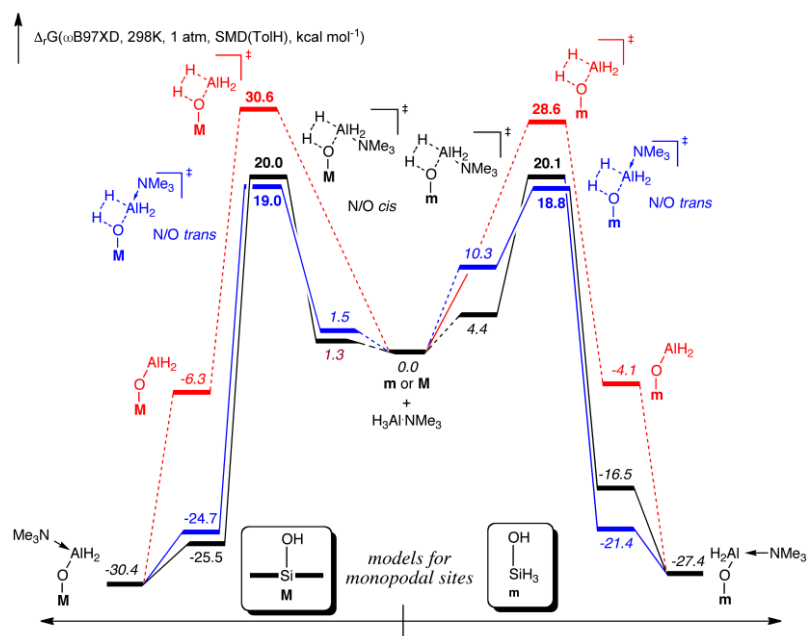

**Figure S7a.** Gibbs energy profile for the functionalization of monopodal sites by  $\text{AlH}_3\cdot\text{NMe}_3$ . **m** refers to the minimalist  $\text{H}_3\text{SiOH}$  model, **M** refers to a silica cluster that shows an isolated silanol group.

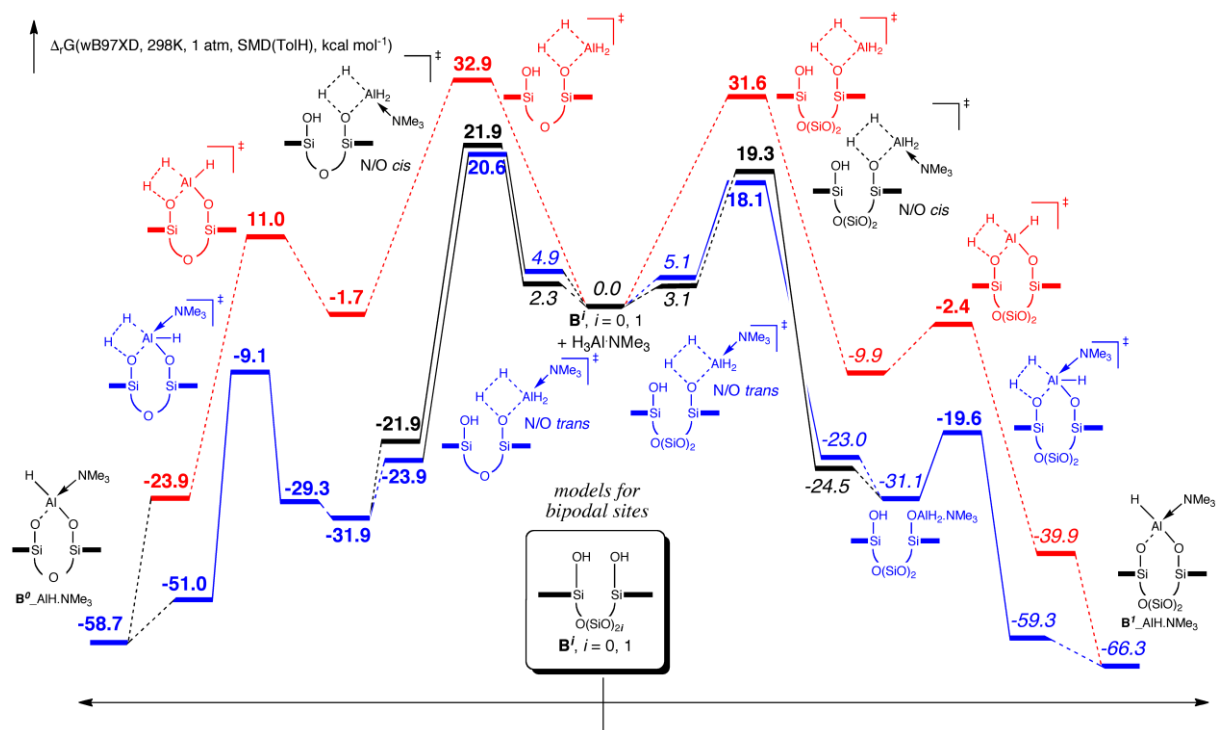

**Figure S7b.** Gibbs energy profile for the functionalization of bipodal sites by  $\text{AlH}_3\cdot\text{NMe}_3$  depending on the cycling strain between the two silanol groups.

## Computational Details

The electronic structure calculations for the depiction of minima and transition states molecular structures were performed at the density functional theory (DFT) level using the  $\omega\text{B97XD}^2$  hybrid functional as implemented in the Gaussian program code.<sup>3</sup> Silicon aluminium atoms were described by the corresponding scalar relativistic pseudopotentials of the Stuttgart-Dresden-Koln type<sup>4</sup> in association with their polarized basis set ( $\alpha_d(\text{Si}) = 0.284$ ;  $\alpha_d(\text{Al}) = 0.190$ ).<sup>5</sup> For the rest atoms the polarized all-electron triple zeta basis set 6-311G(d,p) was used.<sup>6</sup> Optimization were carried without any geometry constraint. Enthalpy energies were obtained at  $T = 298.15\text{K}$  based on the harmonic approximation. Solvation by toluene was taken into account in all calculations, including optimizations and frequency calculation, by the SMD implicit solvent model.<sup>7</sup> Intrinsic Reaction Paths (IRPs) were traced from the various transition structures to verify the reactant to product linkage.<sup>8</sup>

## References

- [1] a) D. Massiot, F. Fayon, M. Capron, I. King, S. Le Calvé, B. Alonso, J. O. Durand, B. Bujoli, Z. Gan, G. Hoatson, *Magn. Reson. Chem.*, **2002**, *40*, 70-76; b) G. Czjzek, J. Fink, F. Gotz, H. Schmidt, J. M. D. Coey, J. P. Rebouillat, A. Lienard, *Phys. Rev. B*, 1981, **23**, 2513-2530.
- [2] J.-D. Chai, M. Head-Gordon, *Phys. Chem. Chem. Phys.*, 2008, **10**, 6615.
- [3] Gaussian 09, Revision D.01, M. J. Frisch, G. W. Trucks, H. B. Schlegel, G. E. Scuseria, M. A. Robb, J. R. Cheeseman, G. Scalmani, V. Barone, B. Mennucci, G. A. Petersson, H. Nakatsuji, M. Caricato, X. Li, H. P. Hratchian, A. F. Izmaylov, J. Bloino, G. Zheng, J. L. Sonnenberg, M. Hada, M. Ehara, K. Toyota, R. Fukuda, J. Hasegawa, M. Ishida, T.



Nakajima, Y. Honda, O. Kitao, H. Nakai, T. Vreven, J. A. Montgomery, Jr., J. E. Peralta, F. Ogliaro, M. Bearpark, J. J. Heyd, E. Brothers, K. N. Kudin, V. N. Staroverov, R. Kobayashi, J. Normand, K. Raghavachari, A. Rendell, J. C. Burant, S. S. Iyengar, J. Tomasi, M. Cossi, N. Rega, J. M. Millam, M. Klene, J. E. Knox, J. B. Cross, V. Bakken, C. Adamo, J. Jaramillo, R. Gomperts, R. E. Stratmann, O. Yazyev, A. J. Austin, R. Cammi, C. Pomelli, J. W. Ochterski, R. L. Martin, K. Morokuma, V. G. Zakrzewski, G. A. Voth, P. Salvador, J. J. Dannenberg, S. Dapprich, A. D. Daniels, Ö. Farkas, J. B. Foresman, J. V. Ortiz, J. Cioslowski, and D. J. Fox, Gaussian, Inc., Wallingford CT, 2009.

[4] A. Bergner, M. Dolg, W. Kuechle, H. Stoll, H. Preuss, *Mol. Phys.*, 1993, **80**, 1431.

[5] A. Höllwarth, M. Böhme, S Dapprich, A.W. Ehlers, A. Gobbi, V. Jonas, K.F. Köhler, R. Stegmann, A. Veldkamp, G. Frenking, *Chem. Phys. Lett.*, 1993, **208**, 237.

[6] a) A. D. McLean, G. S. Chandler, *J. Chem. Phys.*, 1980, **72**, 5639; b) K. Raghavachari, J. S. Binkley, R. Seeger, J. A. Pople, *J. Chem. Phys.*, 1980, **72**, 650.

[7] A. V. Marenich, C. J. Cramer, D. G. Truhlar, *J. Phys. Chem. B*, 2009, **113**, 6378.

[8] a) C. Gonzalez and H. B. Schlegel, *J. Chem. Phys.*, 1989, **90**, 2154; b) C. Gonzalez and H. B. Schlegel, *J. Phys. Chem.*, 1990, **94**, 552.

## Cartesian Coordinates & Energies

### Precursors

#### NMe<sub>3</sub>

E: -174.468415509 ; H: -174.341312 ; G: -174.374945  
N -0.11267145 -1.67982610 0.00322245  
C 0.32466180 -0.98226633 1.19577505  
H 0.05603054 0.07553284 1.12990713  
H -0.16863875 -1.40178667 2.07677783  
H 1.41868429 -1.04766587 1.35371163  
C 0.17549137 -3.09749625 0.08949606  
H -0.31659139 -3.52694749 0.96632561  
H -0.20662712 -3.61071174 -0.79714284  
H 1.25954303 -3.30950179 0.16769116  
C 0.47162775 -1.09891400 -1.18889582  
H 0.08084623 -1.59945439 -2.07890825  
H 0.20997531 -0.03948016 -1.25650183  
H 1.57582291 -1.18024855 -1.20836667

#### AlH<sub>3</sub>

E: -3.78198739162 ; H: -3.759937 ; G: -3.785205  
Al 0.12904135 -0.22357992 0.09530194  
H -0.13692014 0.23745865 1.59240129  
H 1.45508751 0.23206644 -0.65256973  
H -0.93190110 -1.13848416 -0.65487207

#### Me<sub>3</sub>N:AlH<sub>3</sub>

E: -178.310632460 ; H: -178.157273 ; G: -178.197119  
C 0.45181643 -0.98905958 1.21692836  
H 0.19910008 0.07004886 1.14987439  
H -0.02896518 -1.41351561 2.09939760  
H 1.53854975 -1.09598487 1.31202613  
C 0.29692443 -3.12345829 0.09675752  
H -0.18418576 -3.55356684 0.97619100  
H -0.07090108 -3.63417875 -0.79421582  
H 1.38106773 -3.26505060 0.17357649  
C 0.59724069 -1.10287164 -1.19137865  
H 0.21625704 -1.60580828 -2.08117059  
H 0.35082043 -0.04199027 -1.25188458  
H 1.68624123 -1.21941168 -1.14857281

N -0.03061819 -1.68704007 0.00953824  
H -2.56197647 -2.14672038 1.25480986  
H -2.22605609 0.12981437 -0.22986052  
H -2.39288212 -2.30431206 -1.47319274  
Al -2.08887012 -1.47149940 -0.12842320

### Al<sub>2</sub>H<sub>6</sub>

E: -7.61873483477 ; H: -7.570068 ; G: -7.602802

Al -0.04071229 -0.26715849 0.21053184  
H 1.09808393 0.64444139 0.81624632  
H -1.09656380 0.09035718 -0.90806083  
H 0.62149639 -1.85427930 -0.11994667  
Al -0.19483763 -2.68564295 1.18628698  
H -1.33350804 -3.59753090 0.58083587  
H -0.85688151 -1.09851193 1.51599339  
H 0.86082505 -3.04289581 2.30515647

### H<sub>2</sub>

E: -1.17561833209 ; H: -1.162226 ; G: -1.177023

H 0.00000000 0.00000000 0.02759597  
H 0.00000000 0.00000000 0.77240403

## Silica models and grafted complexes

### Monopodal site m

#### m

E: -81.5455501204 ; H: -81.502421 ; G: -81.531720

Si -0.06934056 0.77773319 -0.01628962  
H 0.46156636 -0.61227121 -0.08150333  
H 0.41305888 1.45213836 1.23059536  
H -1.56621967 0.75182097 0.01850576  
O 0.50638618 1.54548996 -1.40058299  
H 0.25045585 2.46146796 -1.51033418

### H<sub>3</sub>SiOH\_AIH<sub>3</sub>·NMe<sub>3</sub>\_TS\_HH (N/O *trans*) adduct

E: -259.858895341 ; H: -259.659509 ; G: -259.712393

Si -2.68789919 -1.88154558 -0.61169623  
H -1.93626797 -3.02915950 -0.03121710  
H -2.33398955 -1.63799791 -2.03142347  
H -4.15664861 -2.11926989 -0.45509153  
O -2.33462806 -0.42137165 0.21802631  
N 1.86515448 0.89152812 0.27467078  
C 2.39990106 0.91104177 -1.09106489  
H 1.83309775 1.62772991 -1.68713147  
H 3.46269167 1.18959572 -1.09663877  
H 2.28235707 -0.07826141 -1.53582293  
C 2.57807412 -0.09774265 1.08994361  
H 3.64660327 0.14605093 1.16667893  
H 2.13831336 -0.12134377 2.08809254  
H 2.46260956 -1.08349138 0.63675895  
C 1.96407475 2.22302605 0.88244921  
H 1.52388611 2.19361234 1.88035708  
H 3.01068019 2.54950098 0.95395955  
H 1.40171809 2.93457855 0.27615162  
H -0.37868217 0.41904986 1.80583657  
H -0.62483796 1.59548634 -0.73018284  
H 0.12081646 -1.08953301 -0.52037270  
Al -0.25164483 0.32680203 0.18918173  
H -2.69605856 -0.30865638 1.09807556

### H<sub>3</sub>SiOH\_AIH<sub>3</sub>·NMe<sub>3</sub>\_TS\_HH (N/O *trans*) TS

E: -259.842478494 ; H: -259.648135 ; G: -259.698880  
Si -4.00781430 0.19059783 1.00549421  
H -3.31071339 -0.94712520 1.68815311  
H -3.99926492 -0.04602857 -0.47013844  
H -5.41985839 0.24865643 1.49504675  
O -3.23521101 1.64570395 1.34093815  
N 0.56116838 2.90255262 1.47422125  
C 1.31429303 3.14800869 0.23281142  
H 0.81417875 3.92460863 -0.34811524  
H 2.33800136 3.47078418 0.45754826  
H 1.35119193 2.23119387 -0.35794676  
C 1.21829049 1.84294339 2.25492933  
H 2.24616298 2.12863803 2.50999973  
H 0.65939908 1.66713929 3.17545985  
H 1.23662267 0.92001540 1.67338061  
C 0.48884916 4.14077911 2.26540129  
H -0.07904914 3.95731388 3.17889661  
H 1.49392313 4.48975004 2.53213587  
H -0.01781069 4.91369342 1.68576255  
H -1.64875010 2.20716862 2.69576536  
H -1.72653091 3.67731250 0.15884474  
H -0.84594618 0.95789712 0.14306701  
Al -1.40251949 2.28104356 0.86556897  
H -2.52567799 1.87526211 2.31506355

### **H<sub>3</sub>SiOH\_AIH<sub>3</sub>NMe<sub>3</sub>\_TS\_HH (N/O *trans*) product / H<sub>2</sub> adduct**

E: -259.895875015 ; H: -259.699499 ; G: -259.755092  
Si -1.88473010 -1.75763310 0.48250251  
H -2.94918497 -1.49074611 1.50330367  
H -0.98342790 -2.83200173 1.02602968  
H -2.53782262 -2.29039674 -0.75920075  
O -1.01861085 -0.38440680 0.18501511  
N 1.66499900 0.63996387 -0.11990808  
C 2.57650656 1.44649506 -0.94906897  
H 2.16156770 2.44860122 -1.06823976  
H 3.56603712 1.51586489 -0.48219690  
H 2.67252888 0.98511248 -1.93318714  
C 2.17367548 -0.73759720 0.01314609  
H 3.15244026 -0.74044272 0.50728170  
H 1.46435294 -1.32161529 0.59988581  
H 2.26461287 -1.18589964 -0.97714070  
C 1.50865057 1.25097113 1.21403282  
H 0.80327658 0.65557065 1.79326261  
H 2.47456839 1.29658393 1.73085079  
H 1.10523819 2.25823969 1.10268208  
H -1.92888383 1.75104270 2.39908076  
H -0.56817838 2.14130850 -1.03983680  
H 0.14980225 -0.17052870 -2.40421901  
Al -0.19913648 0.58557545 -1.03530647  
H -1.75041055 1.25971285 1.86487785

### **H<sub>3</sub>SiOH\_AIH<sub>3</sub>NMe<sub>3</sub>\_TS\_HH (N/O *cis*) adduct**

E: -259.866959418 ; H: -259.667655 ; G: -259.721803  
Si -0.84900945 -0.58519395 -2.65440153  
H 0.37065943 -1.39752652 -2.33895995  
H -2.06997763 -1.39335867 -2.37319355  
H -0.80123733 -0.21024265 -4.10196924  
H -0.24545609 1.41734552 -1.79701654  
O -0.95097672 0.76865877 -1.65861401  
H 3.61720096 1.18978908 -2.15710494  
H 3.30384244 3.74725242 -1.17947136  
H 1.14975313 2.31623440 -1.99909798  
Al 2.67844212 2.29818993 -1.47281184  
N 2.44702408 1.53909499 0.43268379  
C 1.86065503 0.18466691 0.35258239  
H 1.77046681 -0.25177908 1.35363949

|   |            |             |             |
|---|------------|-------------|-------------|
| H | 0.87082227 | 0.24663049  | -0.10042982 |
| H | 2.49866011 | -0.45235340 | -0.26160412 |
| C | 3.77388751 | 1.47061433  | 1.07774453  |
| H | 4.20881742 | 2.46973259  | 1.12962524  |
| H | 3.68306793 | 1.06321541  | 2.09088491  |
| H | 4.43005579 | 0.82728375  | 0.48961818  |
| C | 1.55540946 | 2.42215361  | 1.21221966  |
| H | 1.42202096 | 2.02848610  | 2.22596226  |
| H | 1.98967294 | 3.42118657  | 1.26830019  |
| H | 0.58255082 | 2.48308241  | 0.72273925  |

### **H<sub>3</sub>SiOH\_AIH<sub>3</sub>NMe<sub>3</sub>\_TS\_HH (N/O *cis*) TS**

E: -259.840696035 ; H: -259.646352 ; G: -259.696734

|    |             |             |             |
|----|-------------|-------------|-------------|
| Si | -0.63734776 | 0.19240659  | -2.15522155 |
| H  | -0.06646318 | -1.12528134 | -2.56329902 |
| H  | -1.25309416 | 0.07237511  | -0.80065989 |
| H  | -1.64542607 | 0.65548531  | -3.14989108 |
| H  | 1.01259701  | 1.85526136  | -2.93424917 |
| O  | 0.58978538  | 1.36015724  | -2.05052949 |
| H  | 3.65420080  | 0.99023055  | -1.93599206 |
| H  | 2.58687558  | 3.50214565  | -1.06772131 |
| H  | 1.97479298  | 2.41996197  | -3.34240129 |
| Al | 2.44787535  | 2.00686008  | -1.63581466 |
| N  | 2.21855221  | 1.22980643  | 0.37929162  |
| C  | 2.07799759  | -0.23344983 | 0.39577874  |
| H  | 2.10280475  | -0.61762412 | 1.42309109  |
| H  | 1.12859929  | -0.52483136 | -0.05410500 |
| H  | 2.89140730  | -0.68350865 | -0.17502997 |
| C  | 3.46773833  | 1.59910416  | 1.06701567  |
| H  | 3.59074850  | 2.68273548  | 1.04430837  |
| H  | 3.44796225  | 1.25926034  | 2.10962503  |
| H  | 4.31525253  | 1.13805939  | 0.55687932  |
| C  | 1.07941770  | 1.86261632  | 1.06213749  |
| H  | 1.03040489  | 1.54900462  | 2.11242855  |
| H  | 1.19111625  | 2.94683911  | 1.01704299  |
| H  | 0.15055479  | 1.58555027  | 0.56364016  |

### **H<sub>3</sub>SiOH\_AIH<sub>3</sub>NMe<sub>3</sub>\_TS\_HH (N/O *cis*) product / H<sub>2</sub> adduct**

E: -259.902743082 ; H: -259.708272 ; G: -259.762871

|    |             |             |             |
|----|-------------|-------------|-------------|
| Si | -0.56581926 | 0.20118344  | -2.50373167 |
| H  | 0.20427042  | -0.92408131 | -3.13433037 |
| H  | -1.65574303 | -0.40245365 | -1.66627752 |
| H  | -1.21314894 | 0.98608675  | -3.60696266 |
| H  | 1.03720247  | 2.49183732  | -4.11139033 |
| O  | 0.39491730  | 1.15761270  | -1.56794474 |
| H  | 3.18911786  | 0.83652983  | -2.00372208 |
| H  | 2.21798744  | 3.30776044  | -1.22788247 |
| H  | 1.71541699  | 2.52332634  | -4.42017970 |
| Al | 2.04357624  | 1.71695323  | -1.30236073 |
| N  | 2.25447939  | 1.19365769  | 0.67978929  |
| C  | 2.07002643  | -0.26329281 | 0.82404831  |
| H  | 2.19305950  | -0.56198808 | 1.87121505  |
| H  | 1.06967235  | -0.53281130 | 0.48475383  |
| H  | 2.80589486  | -0.78602015 | 0.21100832  |
| C  | 3.60489491  | 1.57905021  | 1.12936605  |
| H  | 3.74366868  | 2.65209369  | 0.98677880  |
| H  | 3.74223555  | 1.33680224  | 2.18910169  |
| H  | 4.35122245  | 1.04407181  | 0.53972977  |
| C  | 1.23209880  | 1.90934238  | 1.46878546  |
| H  | 1.30664956  | 1.63891280  | 2.52814174  |
| H  | 1.37866623  | 2.98476278  | 1.35986784  |
| H  | 0.24320581  | 1.64822666  | 1.09112111  |

### **H<sub>3</sub>SiO\_AIH<sub>2</sub>NMe<sub>3</sub>**

E: -258.725616216 ; H: -258.544992 ; G: -258.595532

|    |             |             |             |
|----|-------------|-------------|-------------|
| Si | -0.14915944 | 0.57225318  | -4.33979760 |
| H  | 0.82232577  | -0.54046770 | -4.61302413 |
| H  | -1.51282102 | -0.03254292 | -4.18371037 |
| H  | -0.17729053 | 1.45720574  | -5.55403910 |
| O  | 0.27206473  | 1.44951274  | -3.01208129 |
| H  | 2.59775885  | 0.62017287  | -1.60593862 |
| H  | 0.54060476  | 1.83834785  | -0.21777992 |
| Al | 1.31114038  | 1.58133004  | -1.59906622 |
| N  | 2.15118858  | 3.42579365  | -1.95690236 |
| C  | 3.08098577  | 3.74147319  | -0.85641227 |
| H  | 3.54194773  | 4.72352176  | -1.01084739 |
| H  | 2.53706102  | 3.74598526  | 0.08964093  |
| H  | 3.86268777  | 2.98141397  | -0.81274678 |
| C  | 2.87976547  | 3.38831215  | -3.24007507 |
| H  | 2.18072050  | 3.14837739  | -4.04145394 |
| H  | 3.34667489  | 4.35887953  | -3.44192424 |
| H  | 3.65148661  | 2.61808849  | -3.19937021 |
| C  | 1.07686884  | 4.43681000  | -2.02153628 |
| H  | 1.49708135  | 5.42602208  | -2.23489604 |
| H  | 0.37263690  | 4.15974045  | -2.80640695 |
| H  | 0.54907308  | 4.46745029  | -1.06732517 |

## Monopodal site M

### M

E: -1577.76577085 ; H: -1577.421077 ; G: -1577.559994

|    |             |             |             |
|----|-------------|-------------|-------------|
| O  | -0.20157562 | 0.54017456  | 3.98998270  |
| Si | -0.38689758 | 0.77689533  | 2.38875611  |
| O  | 0.70184947  | 1.90846992  | 1.87724372  |
| Si | 1.57843847  | 2.35772877  | 0.55602822  |
| O  | 2.96124684  | 3.06163529  | 1.05272238  |
| O  | -0.12847776 | -0.63734878 | 1.58417525  |
| Si | -0.57608975 | -1.48948460 | 0.24691140  |
| O  | -0.50361019 | -3.08792200 | 0.55504245  |
| O  | -1.91968315 | 1.29919226  | 2.08706918  |
| Si | -2.80680825 | 2.23017503  | 1.05770246  |
| O  | -1.86607620 | 3.44864444  | 0.45968489  |
| Si | -0.84162087 | 3.81213621  | -0.77971173 |
| O  | -1.27599418 | 2.95723547  | -2.12484243 |
| Si | -1.02247633 | 1.54083537  | -2.92713727 |
| O  | 0.50660118  | 1.00898258  | -2.62325829 |
| Si | 1.39406529  | 0.08470004  | -1.58755914 |
| O  | 1.94163111  | 1.02693942  | -0.35237857 |
| O  | 0.45179203  | -1.13506899 | -0.99105516 |
| O  | -2.12263790 | -1.08400806 | -0.17210693 |
| Si | -2.99421185 | -0.02711406 | -1.09537082 |
| O  | -2.11174266 | 0.41120285  | -2.41272245 |
| O  | 2.66950328  | -0.55455088 | -2.37399008 |
| O  | -4.07790340 | 2.87041810  | 1.85140100  |
| O  | -3.36584424 | 1.29406233  | -0.17902115 |
| O  | 0.69820624  | 3.41854226  | -0.34726468 |
| O  | -4.35986452 | -0.73434474 | -1.67114866 |
| O  | -0.93710715 | 5.40539132  | -1.10549430 |
| O  | -1.20902299 | 1.78999783  | -4.52538043 |
| Si | -4.52091264 | 4.40211456  | 2.40997592  |
| H  | -5.04393733 | -0.92453263 | -1.02796687 |
| Si | -1.15468701 | 6.34842973  | -2.48991557 |
| Si | -2.11872223 | 1.12271794  | -5.78279377 |
| Si | 0.91328304  | 1.01200223  | 5.16903678  |
| Si | -1.61653625 | -4.30571772 | 0.91869785  |
| H  | -0.82761290 | -5.46865732 | 1.41060273  |
| H  | -2.55774443 | -3.82556507 | 1.97250811  |
| H  | -2.37291275 | -4.66824461 | -0.31478700 |
| H  | 0.53592514  | 0.28996503  | 6.41599860  |
| H  | 2.28972559  | 0.62877098  | 4.74004555  |
| H  | 0.82958806  | 2.48718693  | 5.37201398  |
| H  | -1.68486248 | 1.81789563  | -7.02654351 |

|    |             |             |             |
|----|-------------|-------------|-------------|
| H  | -1.84538848 | -0.34072891 | -5.87822216 |
| H  | -3.56888887 | 1.35965968  | -5.52761930 |
| H  | -1.03626303 | 7.76773779  | -2.05413402 |
| H  | -0.09990057 | 6.01919816  | -3.49214862 |
| H  | -2.50691029 | 6.08776062  | -3.06296727 |
| H  | -5.78321104 | 4.21840147  | 3.17894427  |
| H  | -3.44583694 | 4.94588056  | 3.28954530  |
| H  | -4.74339207 | 5.31066462  | 1.24814355  |
| Si | 4.57901519  | 3.03992614  | 0.56659023  |
| H  | 5.26027685  | 4.13001128  | 1.31856622  |
| H  | 5.18027088  | 1.71727431  | 0.90287583  |
| H  | 4.66408581  | 3.28244854  | -0.90299326 |
| Si | 3.12545671  | -2.08528365 | -2.92412185 |
| H  | 2.05855652  | -2.63692753 | -3.80927938 |
| H  | 4.39097592  | -1.89723326 | -3.68652412 |
| H  | 3.34419012  | -2.98950184 | -1.75853610 |

### M\_AIH<sub>3</sub>NMe<sub>3</sub>\_TS\_HH (N/O *trans*) adduct

E: -1756.09539239 ; H: -1755.594170 ; G: -1755.754682

|    |             |             |             |
|----|-------------|-------------|-------------|
| O  | -2.25675848 | 0.52163165  | 2.74300850  |
| Si | -1.71163680 | 0.81033365  | 1.23298148  |
| O  | -0.42718802 | 1.84590024  | 1.31340324  |
| Si | 0.98525604  | 2.27425164  | 0.58010113  |
| O  | 2.03806310  | 2.79810588  | 1.70883883  |
| O  | -1.24580266 | -0.60155012 | 0.53185582  |
| Si | -1.09608618 | -1.33274582 | -0.93900935 |
| O  | -1.25935588 | -2.94325406 | -0.78724748 |
| O  | -2.91517610 | 1.51216496  | 0.34955810  |
| Si | -3.15576820 | 2.57430010  | -0.88866662 |
| O  | -1.95429498 | 3.70519120  | -0.90308889 |
| Si | -0.46781392 | 4.03387862  | -1.53526352 |
| O  | -0.31385144 | 3.29812778  | -3.00429936 |
| Si | 0.11996238  | 1.89150475  | -3.74792962 |
| O  | 1.29171745  | 1.15419620  | -2.85683140 |
| Si | 1.59288579  | 0.12119748  | -1.60983697 |
| O  | 1.63161374  | 0.96971417  | -0.19663614 |
| O  | 0.41612116  | -1.03054558 | -1.53146745 |
| O  | -2.20775100 | -0.71756339 | -1.98113244 |
| Si | -2.56344043 | 0.44026571  | -3.09747909 |
| O  | -1.19500527 | 0.90272041  | -3.89036917 |
| O  | 3.03497564  | -0.60310224 | -1.84209654 |
| O  | -4.58476859 | 3.33335002  | -0.66196121 |
| O  | -3.19112011 | 1.75595262  | -2.31198765 |
| O  | 0.69201125  | 3.47924345  | -0.50450892 |
| O  | -0.31891218 | 5.64605520  | -1.72318772 |
| O  | 0.68807822  | 2.22900836  | -5.23770865 |
| Si | -5.04897781 | 4.94631154  | -0.46144770 |
| Si | 0.30037768  | 6.67794477  | -2.90942460 |
| Si | 0.28864773  | 1.76836647  | -6.81410390 |
| Si | -1.75629877 | 0.94343087  | 4.30027104  |
| Si | -2.32907189 | -4.19966646 | -1.12686543 |
| H  | -1.50674540 | -5.32520348 | -1.65764209 |
| H  | -3.02710513 | -4.60875082 | 0.12247870  |
| H  | -3.31516630 | -3.77002320 | -2.16577482 |
| H  | -2.58693623 | 0.14004507  | 5.24037691  |
| H  | -0.31006518 | 0.62091291  | 4.47187460  |
| H  | -1.98625335 | 2.40135987  | 4.51748800  |
| H  | 1.18672028  | 2.54322913  | -7.71550319 |
| H  | 0.51945237  | 0.30406855  | -6.97943464 |
| H  | -1.13929192 | 2.09991781  | -7.08803131 |
| H  | 0.41654923  | 8.02313548  | -2.28133158 |
| H  | 1.63736806  | 6.18837748  | -3.35429918 |
| H  | -0.64201173 | 6.72004951  | -4.06510667 |
| H  | -6.52988046 | 4.93186692  | -0.29553486 |
| H  | -4.39409050 | 5.51051800  | 0.75389967  |
| H  | -4.66529939 | 5.73360099  | -1.66861392 |

|    |             |             |             |
|----|-------------|-------------|-------------|
| Si | 3.57685409  | 2.34496477  | 2.23783263  |
| H  | 3.94266569  | 3.29538310  | 3.32465782  |
| H  | 3.53366637  | 0.94815162  | 2.76069137  |
| H  | 4.54535599  | 2.44028187  | 1.10786599  |
| Si | 3.56970615  | -2.20110009 | -1.96537358 |
| H  | 2.87450691  | -2.87783639 | -3.09860355 |
| H  | 5.03597223  | -2.13436745 | -2.21784170 |
| H  | 3.29045503  | -2.92072784 | -0.68870719 |
| N  | -6.75429501 | -0.79170617 | -0.37996276 |
| C  | -8.01281246 | -0.84536206 | -1.14851381 |
| H  | -8.43708288 | -1.84841176 | -1.08504802 |
| H  | -8.73414625 | -0.12187317 | -0.75201383 |
| H  | -7.81040937 | -0.61090400 | -2.19474052 |
| C  | -7.00816943 | -1.13788363 | 1.03304514  |
| H  | -7.42005355 | -2.14642294 | 1.09478032  |
| H  | -6.06956220 | -1.10095300 | 1.58782844  |
| H  | -7.71744923 | -0.43001690 | 1.47632669  |
| C  | -6.17115821 | 0.56339920  | -0.46143551 |
| H  | -5.24342345 | 0.59028078  | 0.10991964  |
| H  | -5.96124868 | 0.80870712  | -1.50315709 |
| H  | -6.86635706 | 1.30434278  | -0.05278592 |
| H  | -6.22274321 | -3.52351236 | -1.07897562 |
| H  | -4.16763741 | -1.95852806 | -0.16340869 |
| H  | -5.25318119 | -1.54542714 | -2.65775132 |
| Al | -5.40957659 | -2.13933331 | -1.16138148 |
| H  | -4.29255487 | -0.71894279 | -3.79457225 |
| O  | -3.62405026 | -0.14516050 | -4.19881714 |

### M\_AIH<sub>3</sub>NMe<sub>3</sub>\_TS\_HH (N/O *trans*) TS

E: -1756.06602338 ; H: -1755.569357 ; G: -1755.726880

|    |             |             |             |
|----|-------------|-------------|-------------|
| O  | -1.03354030 | 0.71968407  | 3.48532721  |
| Si | -0.82132169 | 0.91854463  | 1.88081113  |
| O  | 0.43383332  | 1.96392153  | 1.62898851  |
| Si | 1.63682527  | 2.33192417  | 0.56516498  |
| O  | 2.89738656  | 2.95967548  | 1.38560430  |
| O  | -0.46603231 | -0.52881400 | 1.18019458  |
| Si | -0.61793287 | -1.39476962 | -0.21444079 |
| O  | -0.73118987 | -2.98395897 | 0.13104063  |
| O  | -2.20198566 | 1.53036635  | 1.22570870  |
| Si | -2.73138375 | 2.47588382  | -0.01470284 |
| O  | -1.59428167 | 3.62932115  | -0.35693576 |
| Si | -0.28428807 | 3.88780226  | -1.32541422 |
| O  | -0.43734879 | 3.01229184  | -2.71707414 |
| Si | -0.09876554 | 1.56423566  | -3.43202333 |
| O  | 1.27680035  | 0.94369680  | -2.77317762 |
| Si | 1.83551901  | 0.01256887  | -1.53508317 |
| O  | 2.12742595  | 0.96732816  | -0.22347137 |
| O  | 0.71873136  | -1.14164420 | -1.14884398 |
| O  | -1.97016627 | -0.91620066 | -1.02196636 |
| Si | -2.55917503 | 0.16183860  | -2.12409739 |
| O  | -1.36042691 | 0.52704401  | -3.20617116 |
| O  | 3.22420664  | -0.71393141 | -1.98369844 |
| O  | -4.11779586 | 3.22101352  | 0.42199424  |
| O  | -2.99358363 | 1.56007963  | -1.35216640 |
| O  | 1.08219102  | 3.43460409  | -0.52701285 |
| O  | -0.19990155 | 5.47179866  | -1.70447782 |
| O  | 0.12997446  | 1.79353545  | -5.03125714 |
| Si | -4.63084233 | 4.82625529  | 0.50976983  |
| Si | -0.21461481 | 6.36542523  | -3.13702596 |
| Si | -0.79104039 | 1.53112386  | -6.42210675 |
| Si | -0.09385176 | 0.96945156  | 4.86575724  |
| Si | -1.96213768 | -4.14009714 | 0.04055797  |
| H  | -1.43012840 | -5.36509351 | 0.70025783  |
| H  | -3.17321417 | -3.64339632 | 0.75574584  |
| H  | -2.28462109 | -4.41457181 | -1.38949976 |
| H  | -0.76700161 | 0.23875969  | 5.97526562  |

|    |             |             |             |
|----|-------------|-------------|-------------|
| H  | 1.28087008  | 0.43140557  | 4.64420338  |
| H  | -0.02872400 | 2.42898594  | 5.16465359  |
| H  | -0.10628878 | 2.26001379  | -7.52595647 |
| H  | -0.85012897 | 0.07063567  | -6.71548392 |
| H  | -2.16917943 | 2.06941957  | -6.22141924 |
| H  | -0.07318801 | 7.79461147  | -2.74319136 |
| H  | 0.92183759  | 5.94410429  | -4.00625516 |
| H  | -1.50890711 | 6.14786437  | -3.84843747 |
| H  | -6.08932465 | 4.78483270  | 0.81291518  |
| H  | -3.89196510 | 5.53526551  | 1.59399978  |
| H  | -4.39418753 | 5.50374910  | -0.79910041 |
| Si | 4.56401957  | 2.69995737  | 1.45697881  |
| H  | 5.12136363  | 3.78177667  | 2.31577588  |
| H  | 4.83333370  | 1.36362373  | 2.06374798  |
| H  | 5.14399976  | 2.76657742  | 0.08466193  |
| Si | 3.77210977  | -2.30178017 | -2.15651123 |
| H  | 2.92644807  | -3.02004798 | -3.15329733 |
| H  | 5.17910498  | -2.20900027 | -2.63708464 |
| H  | 3.71516142  | -2.99860749 | -0.83884889 |
| N  | -7.72306575 | -0.67548880 | -1.64807690 |
| C  | -8.49337650 | -0.76960714 | -2.89906454 |
| H  | -8.34823333 | -1.75529082 | -3.34349863 |
| H  | -9.56163111 | -0.61236492 | -2.70841051 |
| H  | -8.14172483 | -0.01284641 | -3.60216670 |
| C  | -8.17539550 | -1.71148591 | -0.70299876 |
| H  | -8.01967637 | -2.69801376 | -1.14331165 |
| H  | -7.59910659 | -1.63954143 | 0.22065925  |
| H  | -9.23997261 | -1.58557458 | -0.47346563 |
| C  | -7.89292963 | 0.65959179  | -1.04893446 |
| H  | -7.29842666 | 0.72835173  | -0.13687826 |
| H  | -7.54619349 | 1.41889411  | -1.75180034 |
| H  | -8.94716168 | 0.84533467  | -0.81178950 |
| H  | -5.86643424 | -2.45165896 | -2.72620673 |
| H  | -5.23261260 | -0.77983422 | -0.49512505 |
| H  | -5.82752652 | 0.38176032  | -3.11150775 |
| Al | -5.66577716 | -1.04049848 | -2.01098685 |
| H  | -4.82774458 | 0.18945685  | -3.16726572 |
| O  | -3.84954420 | -0.47640581 | -2.89139050 |

### M\_AIH<sub>3</sub>NMe<sub>3</sub>\_TS\_HH (N/O *trans*) product / H<sub>2</sub> adduct

E: -1756.13534361 ; H: -1755.638278 ; G: -1755.796444

|    |             |             |             |
|----|-------------|-------------|-------------|
| O  | -1.49297663 | 0.91989561  | 3.43098098  |
| Si | -1.22405323 | 1.01550584  | 1.82535500  |
| O  | 0.01514545  | 2.06955305  | 1.54311092  |
| Si | 1.24706586  | 2.40167131  | 0.49913180  |
| O  | 2.46793792  | 3.09346770  | 1.32706438  |
| O  | -0.82539350 | -0.47034399 | 1.23550040  |
| Si | -0.93847333 | -1.38818446 | -0.13032380 |
| O  | -1.04703158 | -2.96165041 | 0.28524655  |
| O  | -2.59672027 | 1.55052818  | 1.08669837  |
| Si | -3.09223936 | 2.43907107  | -0.21056664 |
| O  | -1.97090836 | 3.59617492  | -0.57004843 |
| Si | -0.64329361 | 3.82399033  | -1.52610200 |
| O  | -0.75922198 | 2.87474250  | -2.87008571 |
| Si | -0.36789842 | 1.39678549  | -3.49579381 |
| O  | 1.00207273  | 0.85066305  | -2.76198748 |
| Si | 1.53059443  | -0.01577603 | -1.46646925 |
| O  | 1.78297678  | 1.00338927  | -0.19551427 |
| O  | 0.40953550  | -1.15521882 | -1.05207841 |
| O  | -2.27822311 | -0.95403598 | -0.98149021 |
| Si | -2.84844678 | 0.01684882  | -2.20157140 |
| O  | -1.60792396 | 0.34083276  | -3.24698065 |
| O  | 2.93176118  | -0.76272563 | -1.83844034 |
| O  | -4.51402794 | 3.15661813  | 0.15654334  |
| O  | -3.31443174 | 1.45133924  | -1.50121840 |
| O  | 0.70769164  | 3.42831131  | -0.67123911 |



|    |             |             |             |
|----|-------------|-------------|-------------|
| O  | -0.57131804 | 5.38979385  | -1.97201294 |
| O  | -0.09177499 | 1.54370321  | -5.09639522 |
| Si | -5.11474182 | 4.73446961  | 0.13853732  |
| Si | -0.58170909 | 6.24726239  | -3.42692787 |
| Si | -0.99369978 | 1.26741724  | -6.49844433 |
| Si | -0.57989714 | 1.19344172  | 4.82583576  |
| Si | -2.10819985 | -4.22220149 | -0.09464871 |
| H  | -1.59676440 | -5.42446460 | 0.62157850  |
| H  | -3.48048539 | -3.87789722 | 0.37855820  |
| H  | -2.11371471 | -4.44943269 | -1.56800536 |
| H  | -1.26684174 | 0.47057836  | 5.93219942  |
| H  | 0.80279198  | 0.66492869  | 4.63501415  |
| H  | -0.53496798 | 2.65724083  | 5.10635954  |
| H  | -0.29215663 | 1.98499559  | -7.59956494 |
| H  | -1.04289618 | -0.19647049 | -6.77658306 |
| H  | -2.37444614 | 1.80525294  | -6.32261997 |
| H  | -0.49950862 | 7.68933290  | -3.06513320 |
| H  | 0.59156063  | 5.84501782  | -4.25538336 |
| H  | -1.84889149 | 5.96462057  | -4.16313986 |
| H  | -6.57827370 | 4.62648029  | 0.39785228  |
| H  | -4.45267845 | 5.53545706  | 1.20812420  |
| H  | -4.86734222 | 5.35304843  | -1.19666477 |
| Si | 4.14563356  | 2.91852878  | 1.41124065  |
| H  | 4.64440676  | 4.04542803  | 2.24735287  |
| H  | 4.47563252  | 1.61100377  | 2.04959234  |
| H  | 4.72750300  | 2.98231468  | 0.03960844  |
| Si | 3.46034912  | -2.36678865 | -1.88587140 |
| H  | 2.72119377  | -3.10481878 | -2.95087176 |
| H  | 4.91649947  | -2.32072055 | -2.19481443 |
| H  | 3.22671305  | -3.01116310 | -0.56058466 |
| N  | -6.48280513 | -0.74177986 | -1.13385869 |
| C  | -6.72242088 | 0.67536837  | -1.48346323 |
| H  | -7.30523947 | 0.72706490  | -2.40442699 |
| H  | -7.26987975 | 1.17547197  | -0.67719907 |
| H  | -5.76834367 | 1.17832899  | -1.63474755 |
| C  | -7.77263349 | -1.43295373 | -0.93238753 |
| H  | -8.36541182 | -1.37152830 | -1.84621068 |
| H  | -7.59165034 | -2.48288070 | -0.69468402 |
| H  | -8.32731569 | -0.96899198 | -0.10972111 |
| C  | -5.68090890 | -0.82464419 | 0.10461985  |
| H  | -5.47944518 | -1.87055739 | 0.33896959  |
| H  | -4.73228176 | -0.30691972 | -0.02906176 |
| H  | -6.21779389 | -0.35913811 | 0.93794567  |
| H  | -6.58124543 | -1.55382771 | -3.87612818 |
| H  | -5.19448716 | -3.12462940 | -2.05757418 |
| H  | -5.31400162 | 1.91816974  | -4.54399288 |
| Al | -5.52189356 | -1.69099203 | -2.68876320 |
| H  | -5.02991931 | 1.30875299  | -4.21990446 |
| O  | -4.09666912 | -0.65926030 | -2.94414927 |

### M\_AIH<sub>3</sub>NMe<sub>3</sub>\_TS\_HH (N/O *cis*) adduct

E: -1756.09691166 ; H: -1755.596067 ; G: -1755.754981

|    |             |             |             |
|----|-------------|-------------|-------------|
| O  | -1.55561846 | 0.68122997  | 2.97993710  |
| Si | -1.09297685 | 0.95831727  | 1.44086012  |
| O  | 0.21478397  | 1.96323540  | 1.42690700  |
| Si | 1.55798504  | 2.36221771  | 0.55649698  |
| O  | 2.71478468  | 2.89175806  | 1.57351020  |
| O  | -0.70370157 | -0.47437114 | 0.72245160  |
| Si | -0.68677765 | -1.20706823 | -0.75342476 |
| O  | -0.93842310 | -2.80557376 | -0.56328832 |
| O  | -2.34904156 | 1.65161910  | 0.63028955  |
| Si | -2.69091486 | 2.71607526  | -0.57954804 |
| O  | -1.48062832 | 3.82361331  | -0.70508509 |
| Si | -0.04738948 | 4.12040904  | -1.46288560 |
| O  | -0.04229605 | 3.36995839  | -2.93437483 |
| Si | 0.33161846  | 1.95164572  | -3.68608569 |

|    |             |             |             |
|----|-------------|-------------|-------------|
| O  | 1.56349225  | 1.22411804  | -2.87073657 |
| Si | 1.95349650  | 0.18759713  | -1.65280150 |
| O  | 2.11019553  | 1.02763577  | -0.24538607 |
| O  | 0.76127974  | -0.94594931 | -1.49253216 |
| O  | -1.89894410 | -0.57582244 | -1.67859144 |
| Si | -2.31410259 | 0.55662050  | -2.81104004 |
| O  | -0.99360723 | 0.96537281  | -3.70491997 |
| O  | 3.36112181  | -0.55999074 | -1.98723355 |
| O  | -4.09403514 | 3.46801504  | -0.22259598 |
| O  | -2.85943197 | 1.89590774  | -2.00198135 |
| O  | 1.18012261  | 3.54114523  | -0.52979544 |
| O  | 0.13665962  | 5.72382723  | -1.68160327 |
| O  | 0.79160590  | 2.25486373  | -5.21873705 |
| Si | -5.34348363 | 4.19598520  | -1.09669652 |
| Si | 0.34168682  | 6.75308206  | -3.00663687 |
| Si | 0.26734678  | 1.79749339  | -6.75962255 |
| Si | -0.89474972 | 0.94331687  | 4.51471094  |
| Si | -1.85422295 | -3.96698765 | -1.39025676 |
| H  | -1.40855575 | -5.29126250 | -0.87577161 |
| H  | -3.29960306 | -3.74035230 | -1.10361363 |
| H  | -1.59333590 | -3.85507104 | -2.85493041 |
| H  | -1.85206714 | 0.34391350  | 5.48547055  |
| H  | 0.43495807  | 0.27296006  | 4.60623691  |
| H  | -0.75291725 | 2.40842954  | 4.75223869  |
| H  | 1.21365546  | 2.42129091  | -7.72524963 |
| H  | 0.30115082  | 0.31107292  | -6.87795328 |
| H  | -1.11921009 | 2.29946848  | -6.98192880 |
| H  | 0.66007591  | 8.09694939  | -2.45026158 |
| H  | 1.45956864  | 6.25695135  | -3.86014139 |
| H  | -0.92428729 | 6.79835295  | -3.79511275 |
| H  | -6.19237049 | 3.12792831  | -1.70107691 |
| H  | -6.13154307 | 4.99941366  | -0.12201732 |
| H  | -4.77193409 | 5.06779336  | -2.16390768 |
| Si | 4.35005619  | 2.54909883  | 1.83259922  |
| H  | 4.86656431  | 3.61739609  | 2.73202969  |
| H  | 4.47553977  | 1.21167265  | 2.48141011  |
| H  | 5.07812637  | 2.55823799  | 0.53054718  |
| Si | 3.83418654  | -2.09583604 | -2.50911031 |
| H  | 3.07545572  | -2.46130764 | -3.74093665 |
| H  | 5.29269299  | -2.01252576 | -2.79737984 |
| H  | 3.56775585  | -3.08976707 | -1.42951775 |
| H  | -4.14300001 | -0.55573432 | -3.38452212 |
| O  | -3.45216617 | -0.03358833 | -3.82333083 |
| H  | -7.64155688 | -1.30916564 | -1.52668656 |
| H  | -6.06233006 | -3.45049179 | -0.81892286 |
| H  | -5.04264300 | -1.41993982 | -2.30490105 |
| Al | -6.17679094 | -1.91193241 | -1.26301210 |
| N  | -5.59899282 | -0.90842880 | 0.43437224  |
| C  | -6.53432140 | -1.22403041 | 1.53182663  |
| H  | -6.25223259 | -0.67970628 | 2.43981456  |
| H  | -7.54772119 | -0.94111060 | 1.24283643  |
| H  | -6.50822010 | -2.29599087 | 1.73323028  |
| C  | -5.62295449 | 0.54153040  | 0.15314399  |
| H  | -5.26757711 | 1.10746370  | 1.01943756  |
| H  | -4.97572884 | 0.75088964  | -0.69920981 |
| H  | -6.64101375 | 0.84519845  | -0.09369007 |
| C  | -4.22934888 | -1.31545674 | 0.81156067  |
| H  | -3.55076562 | -1.06003619 | -0.00090688 |
| H  | -3.91593526 | -0.79632076 | 1.72319327  |
| H  | -4.20339286 | -2.39228660 | 0.98296075  |

### M\_AIH<sub>3</sub>NMe<sub>3</sub>\_TS\_HH (N/O *cis*) TS

E: -1756.06662034 ; H: -1755.569772 ; G: -1755.725246

|    |             |            |            |
|----|-------------|------------|------------|
| O  | -0.71363201 | 0.75433670 | 3.52728454 |
| Si | -0.53666710 | 0.94359501 | 1.91986095 |
| O  | 0.73463678  | 1.95323743 | 1.62051734 |

|    |             |             |             |
|----|-------------|-------------|-------------|
| Si | 1.91466090  | 2.29856826  | 0.52185701  |
| O  | 3.22080179  | 2.87900037  | 1.30074017  |
| O  | -0.25570930 | -0.51729180 | 1.21179296  |
| Si | -0.48680057 | -1.34531225 | -0.19257641 |
| O  | -0.69185927 | -2.92960479 | 0.11477848  |
| O  | -1.92004080 | 1.58938397  | 1.29398991  |
| Si | -2.46108853 | 2.60129876  | 0.11672318  |
| O  | -1.30965676 | 3.71575462  | -0.26715432 |
| Si | -0.02595691 | 3.93246348  | -1.28390810 |
| O  | -0.27067008 | 3.05835915  | -2.66504927 |
| Si | 0.01686764  | 1.62588871  | -3.42650305 |
| O  | 1.37622334  | 0.93908058  | -2.80924982 |
| Si | 1.96415670  | -0.01230905 | -1.59661964 |
| O  | 2.33369255  | 0.92637018  | -0.29596408 |
| O  | 0.81740614  | -1.12607133 | -1.17656839 |
| O  | -1.84052852 | -0.76883872 | -0.94519534 |
| Si | -2.41488522 | 0.33040344  | -2.02570047 |
| O  | -1.28605030 | 0.62644336  | -3.18447740 |
| O  | 3.30887406  | -0.78092827 | -2.09732095 |
| O  | -3.81958886 | 3.33107132  | 0.63992717  |
| O  | -2.81247512 | 1.71849622  | -1.23801743 |
| O  | 1.35046428  | 3.42447087  | -0.54078362 |
| O  | 0.09639159  | 5.51048800  | -1.66655949 |
| O  | 0.20388232  | 1.87166913  | -5.02456657 |
| Si | -4.84985399 | 4.57561824  | 0.14658817  |
| Si | 0.10299302  | 6.40960044  | -3.09804315 |
| Si | -0.73847086 | 1.63985876  | -6.41045578 |
| Si | 0.24423744  | 1.00938472  | 4.89690336  |
| Si | -1.88651094 | -4.07000974 | -0.27461846 |
| H  | -1.28374097 | -5.40555169 | -0.00572756 |
| H  | -3.07274671 | -3.84417982 | 0.59981769  |
| H  | -2.25908271 | -3.92753423 | -1.71008404 |
| H  | -0.41764659 | 0.28276168  | 6.01514643  |
| H  | 1.61433101  | 0.46896641  | 4.65592013  |
| H  | 0.31197318  | 2.47047433  | 5.18549659  |
| H  | -0.04872523 | 2.36399960  | -7.51329285 |
| H  | -0.82627288 | 0.18208377  | -6.70807258 |
| H  | -2.10127020 | 2.20389279  | -6.18301448 |
| H  | 0.30245591  | 7.83041763  | -2.70113240 |
| H  | 1.21479950  | 5.94323376  | -3.97608971 |
| H  | -1.20539629 | 6.24001797  | -3.79572700 |
| H  | -5.52402894 | 4.17215976  | -1.12306369 |
| H  | -5.85087220 | 4.75289144  | 1.23396617  |
| H  | -4.05956752 | 5.82209008  | -0.06340342 |
| Si | 4.87127940  | 2.51864016  | 1.36366172  |
| H  | 5.49116890  | 3.55240534  | 2.23796436  |
| H  | 5.05904095  | 1.15802103  | 1.94550282  |
| H  | 5.44767720  | 2.57473574  | -0.01029550 |
| Si | 3.69719362  | -2.33057795 | -2.65148510 |
| H  | 2.75538862  | -2.72098747 | -3.74096340 |
| H  | 5.09185671  | -2.25507654 | -3.16707337 |
| H  | 3.60425282  | -3.29666715 | -1.51983106 |
| H  | -3.76255763 | -1.05832364 | -3.44347589 |
| O  | -3.79386295 | -0.26111496 | -2.71329004 |
| H  | -6.70630137 | -1.28367013 | -3.22735314 |
| H  | -5.09714163 | -2.91016260 | -1.48972618 |
| H  | -4.31486265 | -2.07253830 | -3.81581502 |
| Al | -5.35873426 | -1.64092438 | -2.43620611 |
| N  | -5.98523116 | -0.44546498 | -0.73213641 |
| C  | -7.26248056 | -1.05829344 | -0.32575075 |
| H  | -7.67041854 | -0.54703075 | 0.55431005  |
| H  | -7.97995722 | -0.99207632 | -1.14433497 |
| H  | -7.10062792 | -2.11044626 | -0.08339884 |
| C  | -6.21511792 | 0.96202704  | -1.10052841 |
| H  | -6.65790852 | 1.51057501  | -0.25982006 |
| H  | -5.27154764 | 1.42916764  | -1.37630445 |
| H  | -6.89521555 | 1.00479255  | -1.95301277 |

|   |             |             |            |
|---|-------------|-------------|------------|
| C | -5.04425142 | -0.53016405 | 0.39705413 |
| H | -4.09851076 | -0.05897224 | 0.14118245 |
| H | -5.45161106 | -0.02410965 | 1.28046431 |
| H | -4.85759391 | -1.57812742 | 0.63419608 |

### **M\_AIH<sub>3</sub>NMe<sub>3</sub>\_TS\_HH (N/O *cis*) product / H<sub>2</sub> adduct**

E: -1756.13487448 ; H: -1755.637048 ; G: -1755.797817

|    |             |             |             |
|----|-------------|-------------|-------------|
| O  | -0.69681689 | 0.78428803  | 3.55210716  |
| Si | -0.54160794 | 0.96929739  | 1.93947874  |
| O  | 0.73556313  | 1.96996239  | 1.62979716  |
| Si | 1.90947215  | 2.30415810  | 0.52148799  |
| O  | 3.22709003  | 2.87401446  | 1.29206833  |
| O  | -0.27881976 | -0.49562262 | 1.23545726  |
| Si | -0.54043781 | -1.31141553 | -0.17398576 |
| O  | -0.73405653 | -2.89948025 | 0.14712345  |
| O  | -1.92642436 | 1.62931863  | 1.33601635  |
| Si | -2.45820225 | 2.62833572  | 0.13910021  |
| O  | -1.30203959 | 3.74490707  | -0.23348749 |
| Si | -0.03208967 | 3.95004022  | -1.26789436 |
| O  | -0.29660009 | 3.08424027  | -2.64850758 |
| Si | -0.04018761 | 1.63729515  | -3.39772827 |
| O  | 1.33580029  | 0.95932614  | -2.79875606 |
| Si | 1.91573719  | -0.00353800 | -1.59412128 |
| O  | 2.31477576  | 0.92676298  | -0.29441038 |
| O  | 0.76335230  | -1.10596742 | -1.16437018 |
| O  | -1.89843515 | -0.73704473 | -0.89974296 |
| Si | -2.50292376 | 0.33462974  | -2.01521632 |
| O  | -1.32965096 | 0.64113118  | -3.14062159 |
| O  | 3.24829860  | -0.79070362 | -2.10533256 |
| O  | -3.80770086 | 3.37664818  | 0.67589353  |
| O  | -2.81988350 | 1.75121004  | -1.20270021 |
| O  | 1.35064652  | 3.43475344  | -0.53821761 |
| O  | 0.10036683  | 5.52926031  | -1.65016419 |
| O  | 0.13674539  | 1.88156100  | -5.00107759 |
| Si | -4.80643192 | 4.64753570  | 0.19476140  |
| Si | 0.11158814  | 6.41937845  | -3.08597507 |
| Si | -0.81384225 | 1.59904529  | -6.36889706 |
| Si | 0.27501477  | 1.08288337  | 4.90119621  |
| Si | -1.87934356 | -4.05751571 | -0.31043048 |
| H  | -1.31997876 | -5.37774205 | 0.09487946  |
| H  | -3.16054077 | -3.79553471 | 0.40801181  |
| H  | -2.09354907 | -4.00244818 | -1.78467370 |
| H  | -0.36071597 | 0.37046103  | 6.04416638  |
| H  | 1.65067596  | 0.55877604  | 4.65618999  |
| H  | 0.32508848  | 2.55014726  | 5.16303251  |
| H  | -0.14471186 | 2.30442012  | -7.49744158 |
| H  | -0.88234194 | 0.13358916  | -6.63634364 |
| H  | -2.18481256 | 2.14639429  | -6.15058106 |
| H  | 0.32412398  | 7.84110956  | -2.69754321 |
| H  | 1.21759873  | 5.94181657  | -3.96557692 |
| H  | -1.19925121 | 6.26026154  | -3.78182297 |
| H  | -5.51127730 | 4.26307605  | -1.06486803 |
| H  | -5.79225696 | 4.85302748  | 1.29215971  |
| H  | -3.99217425 | 5.87634524  | -0.02766776 |
| Si | 4.87015872  | 2.48409172  | 1.34459916  |
| H  | 5.51406803  | 3.50302714  | 2.21957926  |
| H  | 5.03922726  | 1.11844487  | 1.92074775  |
| H  | 5.44253052  | 2.53556608  | -0.03134005 |
| Si | 3.60843798  | -2.35321869 | -2.63627212 |
| H  | 2.65426256  | -2.75049948 | -3.71277711 |
| H  | 5.00024539  | -2.30826314 | -3.16394244 |
| H  | 3.51205208  | -3.30253089 | -1.49021119 |
| H  | -3.41138277 | -2.13382472 | -4.60334433 |
| O  | -3.84792210 | -0.23178745 | -2.67624142 |
| H  | -6.43054763 | -1.08883852 | -3.35834072 |
| H  | -4.86892086 | -2.73259192 | -1.75916320 |

|    |             |             |             |
|----|-------------|-------------|-------------|
| H  | -3.73114068 | -2.78951661 | -4.75926116 |
| Al | -5.24068688 | -1.27736088 | -2.30963803 |
| N  | -6.01621306 | -0.38598717 | -0.61711022 |
| C  | -7.28935113 | -1.06863933 | -0.31059396 |
| H  | -7.74789633 | -0.63383715 | 0.58433898  |
| H  | -7.97473499 | -0.96307874 | -1.15282915 |
| H  | -7.10103575 | -2.12952189 | -0.13485613 |
| C  | -6.26405165 | 1.04778520  | -0.87885805 |
| H  | -6.71488973 | 1.51910569  | 0.00153651  |
| H  | -5.32085726 | 1.53954826  | -1.11361252 |
| H  | -6.94084003 | 1.14953491  | -1.72867332 |
| C  | -5.09358888 | -0.53487325 | 0.52776936  |
| H  | -4.15431540 | -0.02436161 | 0.32212459  |
| H  | -5.53661770 | -0.10120095 | 1.43065459  |
| H  | -4.88784784 | -1.59273031 | 0.69485017  |

### M<sub>2</sub>AlH<sub>2</sub>NMe<sub>3</sub>

E: -1754.95718644 ; H: -1754.475668 ; G: -1754.628472

|    |             |             |             |
|----|-------------|-------------|-------------|
| O  | -1.05799233 | 0.88348183  | 3.49906927  |
| Si | -0.83555286 | 1.07317810  | 1.89481176  |
| O  | 0.48504545  | 2.03365141  | 1.63964449  |
| Si | 1.70197815  | 2.31255379  | 0.56185652  |
| O  | 3.02758081  | 2.82200343  | 1.36239225  |
| O  | -0.59255561 | -0.39341162 | 1.18739665  |
| Si | -0.85588932 | -1.20299719 | -0.22656918 |
| O  | -1.12027658 | -2.78297644 | 0.08761986  |
| O  | -2.17426049 | 1.78115943  | 1.24416259  |
| Si | -2.63371198 | 2.80295652  | 0.03443398  |
| O  | -1.42430150 | 3.87952276  | -0.29101602 |
| Si | -0.11485610 | 4.03905632  | -1.28395125 |
| O  | -0.36906724 | 3.18890808  | -2.67495663 |
| Si | -0.14040881 | 1.73386716  | -3.41887575 |
| O  | 1.19462790  | 1.00982643  | -2.77954946 |
| Si | 1.68450963  | 0.01148506  | -1.56558758 |
| O  | 2.06272268  | 0.91481372  | -0.23935204 |
| O  | 0.47743972  | -1.05094814 | -1.18511265 |
| O  | -2.17739528 | -0.57827541 | -0.98020919 |
| Si | -2.69683885 | 0.51345955  | -2.11821923 |
| O  | -1.46599886 | 0.78075926  | -3.19111967 |
| O  | 3.00026463  | -0.82546508 | -2.03985630 |
| O  | -3.96630811 | 3.61998254  | 0.51343872  |
| O  | -2.99378239 | 1.93949672  | -1.31291088 |
| O  | 1.22191308  | 3.46514834  | -0.51207587 |
| O  | -4.02921808 | 0.00454719  | -2.84584803 |
| O  | 0.09236231  | 5.61414440  | -1.64745934 |
| O  | 0.08963040  | 1.97380813  | -5.01535340 |
| Si | -4.42119070 | 5.24548803  | 0.56221386  |
| Si | 0.23547109  | 6.51634578  | -3.06877314 |
| Si | -0.82808534 | 1.72151929  | -6.41164776 |
| Si | -0.12049399 | 1.11828544  | 4.88472494  |
| Si | -2.45180300 | -3.80160163 | -0.14250474 |
| H  | -2.08332536 | -5.11046969 | 0.46724724  |
| H  | -3.64372864 | -3.22645497 | 0.54769924  |
| H  | -2.72528045 | -3.95388756 | -1.59923363 |
| H  | -0.81366652 | 0.40116719  | 5.99089049  |
| H  | 1.24451450  | 0.55383880  | 4.67052208  |
| H  | -0.03211274 | 2.57687282  | 5.18132600  |
| H  | -0.12196686 | 2.43446789  | -7.51274941 |
| H  | -0.90611667 | 0.26081014  | -6.69979305 |
| H  | -2.19721558 | 2.28357679  | -6.22125274 |
| H  | 0.55230198  | 7.91052921  | -2.65198377 |
| H  | 1.33099854  | 5.95776334  | -3.91270053 |
| H  | -1.05663660 | 6.47505127  | -3.81403770 |
| H  | -5.88342172 | 5.26024842  | 0.84982205  |
| H  | -3.66892190 | 5.94561171  | 1.64261039  |
| H  | -4.14592739 | 5.88587892  | -0.75716556 |

|    |             |             |             |
|----|-------------|-------------|-------------|
| Si | 4.63285815  | 2.30727750  | 1.47747323  |
| H  | 5.35726627  | 3.35533945  | 2.24892801  |
| H  | 4.68384008  | 1.00127708  | 2.19725850  |
| H  | 5.21598438  | 2.16331231  | 0.11207714  |
| Si | 3.44476474  | -2.45468515 | -2.08071232 |
| H  | 2.67297048  | -3.15572406 | -3.14719898 |
| H  | 4.90252399  | -2.48571440 | -2.38423339 |
| H  | 3.17374039  | -3.08291915 | -0.75477275 |
| H  | -6.60514193 | -0.64474552 | -3.73597381 |
| H  | -5.33024036 | -2.37048136 | -1.97778600 |
| Al | -5.53531467 | -0.90030583 | -2.57736522 |
| N  | -6.37749478 | 0.09258064  | -0.98210579 |
| C  | -7.72554434 | -0.47913902 | -0.78791215 |
| H  | -7.64197041 | -1.54811177 | -0.58303075 |
| H  | -8.22844978 | 0.00948930  | 0.05355469  |
| H  | -8.31547778 | -0.33432971 | -1.69409173 |
| C  | -5.57589966 | -0.10648858 | 0.24330563  |
| H  | -5.47311817 | -1.17359298 | 0.44336419  |
| H  | -4.58403369 | 0.32410133  | 0.11295721  |
| H  | -6.05866278 | 0.38155309  | 1.09674692  |
| C  | -6.48259710 | 1.53624641  | -1.28453459 |
| H  | -5.48562168 | 1.95114075  | -1.42766363 |
| H  | -7.06254088 | 1.67261897  | -2.19862300 |
| H  | -6.97638062 | 2.05984182  | -0.45876409 |

## Bipodal site B<sup>0</sup>

### B<sup>0</sup>

E: -1572.64333315 ; H: -1572.316896 ; G: -1572.452007

|    |             |             |             |
|----|-------------|-------------|-------------|
| O  | -0.36734580 | 0.84129126  | 4.05598538  |
| Si | -0.51173892 | 0.99856910  | 2.44029620  |
| O  | 0.55924788  | 2.12419670  | 1.89062723  |
| Si | 1.43073898  | 2.54276100  | 0.55893004  |
| O  | 2.77671891  | 3.32173605  | 1.04483760  |
| O  | -0.20028272 | -0.44884747 | 1.71028065  |
| Si | -0.60385482 | -1.37519534 | 0.40920139  |
| O  | -0.48237082 | -2.95177805 | 0.80352258  |
| O  | -2.04932696 | 1.47817426  | 2.10162921  |
| Si | -2.96240191 | 2.30434866  | 1.00256213  |
| O  | -2.04693267 | 3.52285800  | 0.36871123  |
| Si | -1.01833293 | 3.85664925  | -0.87381635 |
| O  | -1.40478213 | 2.92592454  | -2.18261380 |
| Si | -1.09495682 | 1.48393480  | -2.91367017 |
| O  | 0.44972025  | 1.01848637  | -2.57635553 |
| Si | 1.34189333  | 0.17222131  | -1.48241678 |
| O  | 1.84663701  | 1.18630365  | -0.28645729 |
| O  | 0.42476051  | -1.04115000 | -0.83308988 |
| O  | -2.15791582 | -1.04380514 | -0.04599642 |
| Si | -3.04358332 | -0.06016222 | -1.03574119 |
| O  | -2.14646952 | 0.33966921  | -2.35482267 |
| O  | 2.63654454  | -0.48335681 | -2.22473934 |
| O  | -4.32549980 | 2.89179076  | 1.70471931  |
| O  | -3.46858459 | 1.29087689  | -0.19043604 |
| O  | 0.52795387  | 3.52714375  | -0.40825725 |
| O  | -4.37740519 | -0.83541045 | -1.59736364 |
| O  | -1.15257340 | 5.42995890  | -1.27538015 |
| O  | -1.27504389 | 1.65163068  | -4.52341774 |
| H  | -4.20063037 | 3.53616284  | 2.40272112  |
| H  | -5.08475638 | -0.97608302 | -0.96670990 |
| Si | -1.16997135 | 6.31241787  | -2.71681581 |
| Si | -2.10457425 | 0.86625812  | -5.76777878 |
| Si | 0.64419995  | 0.01722152  | 5.12768611  |
| Si | -1.53379722 | -4.27045377 | 0.89130491  |
| H  | -0.71969822 | -5.42803048 | 1.35390551  |
| H  | -2.62411328 | -3.97428096 | 1.86696466  |
| H  | -2.11503965 | -4.53935274 | -0.45567989 |
| H  | 0.64972509  | 0.79139210  | 6.40002862  |

|    |             |             |             |
|----|-------------|-------------|-------------|
| H  | 0.09852715  | -1.35251381 | 5.35411092  |
| H  | 2.02089338  | -0.06692476 | 4.55776206  |
| H  | -1.59805364 | 1.44778294  | -7.04146800 |
| H  | -1.82439575 | -0.59819140 | -5.71344833 |
| H  | -3.56813275 | 1.11418841  | -5.62234815 |
| H  | -1.03270138 | 7.74514627  | -2.33536328 |
| H  | -0.02856681 | 5.88607857  | -3.57812837 |
| H  | -2.46185723 | 6.07950091  | -3.42491893 |
| Si | 4.23126195  | 3.81897230  | 0.34450507  |
| H  | 4.66437994  | 5.04669277  | 1.06798154  |
| H  | 5.24132938  | 2.73414031  | 0.50448751  |
| H  | 4.01574320  | 4.11180521  | -1.10338396 |
| Si | 3.32336051  | -2.02532741 | -2.30578360 |
| H  | 2.36472831  | -2.96508282 | -2.95623960 |
| H  | 4.56182127  | -1.89179187 | -3.12149428 |
| H  | 3.65120790  | -2.49934074 | -0.92965187 |

**B<sup>0</sup>\_AlH<sub>3</sub>·NMe<sub>3</sub>\_TS\_HH (N/O *trans*) adduct**

E: -1750.97413535 ; H: -1750.491099 ; G: -1750.641381

|    |             |             |             |
|----|-------------|-------------|-------------|
| O  | -2.00453017 | -0.03388507 | 3.90485130  |
| Si | -1.82720316 | 0.35676188  | 2.33745839  |
| O  | -1.01538440 | 1.78866755  | 2.18815716  |
| Si | 0.00986607  | 2.61807868  | 1.21185437  |
| O  | 0.91434368  | 3.62875713  | 2.12096549  |
| O  | -0.92097072 | -0.82417324 | 1.62078662  |
| Si | -0.75286068 | -1.57888528 | 0.17025548  |
| O  | -0.30291816 | -3.12812549 | 0.40986420  |
| O  | -3.27747562 | 0.43244304  | 1.56402853  |
| Si | -4.12348995 | 1.23539738  | 0.39862902  |
| O  | -3.41574335 | 2.70723032  | 0.13657516  |
| Si | -2.26543765 | 3.49465533  | -0.73170292 |
| O  | -2.03950281 | 2.75823190  | -2.18940982 |
| Si | -1.19207654 | 1.54197377  | -2.91561219 |
| O  | 0.28580797  | 1.42439931  | -2.20047934 |
| Si | 1.09007989  | 0.66579529  | -0.97978288 |
| O  | 1.00689298  | 1.58361858  | 0.39501924  |
| O  | 0.40813161  | -0.80669283 | -0.71141757 |
| O  | -2.18156893 | -1.55276496 | -0.66004387 |
| Si | -3.05324900 | -0.69901035 | -1.77259582 |
| O  | -2.01853433 | 0.12354930  | -2.75496128 |
| O  | 2.65301142  | 0.48827722  | -1.40394736 |
| O  | -4.06732828 | 0.33902457  | -0.98778541 |
| O  | -0.85948051 | 3.50775061  | 0.12748984  |
| O  | -3.90753160 | -1.70605456 | -2.75051219 |
| O  | -2.74416728 | 5.03626769  | -0.98475465 |
| O  | -1.00820659 | 1.88731144  | -4.49671014 |
| H  | -4.68574738 | -2.10967057 | -2.36407651 |
| Si | -2.96924035 | 6.02712515  | -2.33422018 |
| Si | -1.59003177 | 1.27083424  | -5.95837280 |
| Si | -2.96320798 | 0.25224485  | 5.26065619  |
| Si | -0.84409962 | -4.64724709 | -0.08617110 |
| H  | 0.10720645  | -5.64189179 | 0.48172764  |
| H  | -2.22157772 | -4.88288483 | 0.43761669  |
| H  | -0.84972333 | -4.71858743 | -1.57654627 |
| H  | -2.56063871 | 1.53284260  | 5.90872597  |
| H  | -4.40565367 | 0.28386624  | 4.88417344  |
| H  | -2.70095145 | -0.88833500 | 6.18685933  |
| H  | -1.07562046 | 2.17335394  | -7.02553387 |
| H  | -1.08131937 | -0.11704890 | -6.15358876 |
| H  | -3.08185338 | 1.27471558  | -5.94488851 |
| H  | -3.40199554 | 7.35187548  | -1.80583443 |
| H  | -1.68564362 | 6.15750031  | -3.08220680 |
| H  | -4.02513771 | 5.44870662  | -3.21401729 |
| Si | 2.54928422  | 4.04034404  | 2.21452674  |
| H  | 2.65037454  | 5.12535288  | 3.22987907  |
| H  | 3.34415371  | 2.85026368  | 2.63679836  |

|    |             |             |             |
|----|-------------|-------------|-------------|
| H  | 3.02342278  | 4.52183116  | 0.88382760  |
| Si | 4.17333504  | 0.73990898  | -0.71888528 |
| H  | 4.38847666  | -0.22966151 | 0.39458625  |
| H  | 5.17053921  | 0.52277978  | -1.80288514 |
| H  | 4.26175976  | 2.13678954  | -0.19871088 |
| H  | -5.86540630 | 2.10116455  | 1.46917173  |
| O  | -5.69932493 | 1.42261756  | 0.79772987  |
| H  | -5.88331161 | 3.40474675  | 2.63052061  |
| H  | -3.49140894 | 2.49323529  | 3.49139163  |
| H  | -5.30738664 | 3.48735275  | 5.29520808  |
| Al | -4.75056515 | 3.42981507  | 3.79119084  |
| N  | -3.90956584 | 5.28452131  | 3.55122603  |
| C  | -2.83725415 | 5.43736446  | 4.55701812  |
| H  | -2.35733380 | 6.41660393  | 4.45285612  |
| H  | -3.25993102 | 5.34648984  | 5.55869814  |
| H  | -2.08959598 | 4.65554131  | 4.41203437  |
| C  | -3.33207833 | 5.38759196  | 2.19508876  |
| H  | -2.58085242 | 4.60851937  | 2.06829698  |
| H  | -4.11376702 | 5.25133438  | 1.44849762  |
| H  | -2.86199605 | 6.36654555  | 2.05253691  |
| C  | -4.93494739 | 6.32945360  | 3.74271048  |
| H  | -5.71719109 | 6.21233651  | 2.99121331  |
| H  | -5.37677065 | 6.23072277  | 4.73538626  |
| H  | -4.48758988 | 7.32449890  | 3.64266333  |

### **B<sup>0</sup>\_AlH<sub>3</sub>NMe<sub>3</sub>\_TS\_HH (N/O *trans*) TS**

E: -1750.94275496 ; H: -1750.465671 ; G: -1750.616236

|    |             |             |             |
|----|-------------|-------------|-------------|
| O  | -0.85973829 | 0.90205715  | 4.02219256  |
| Si | -0.93259492 | 1.03107520  | 2.39817082  |
| O  | -0.01278280 | 2.31075186  | 1.91965445  |
| Si | 0.89749024  | 2.85926994  | 0.66202688  |
| O  | 2.08743563  | 3.82137856  | 1.22506425  |
| O  | -0.34122786 | -0.36394095 | 1.72723659  |
| Si | -0.53799124 | -1.30626304 | 0.39113038  |
| O  | -0.24140900 | -2.86016143 | 0.78946210  |
| O  | -2.48294743 | 1.23473503  | 1.89964998  |
| Si | -3.43986807 | 1.99741737  | 0.79137951  |
| O  | -2.65030602 | 3.31891387  | 0.18203223  |
| Si | -1.58669069 | 3.81233286  | -0.96596069 |
| O  | -1.71731607 | 2.86202773  | -2.31292618 |
| Si | -1.15637561 | 1.46726608  | -2.98761052 |
| O  | 0.40540946  | 1.22525334  | -2.52368807 |
| Si | 1.31376167  | 0.50499883  | -1.35501848 |
| O  | 1.57649236  | 1.57487088  | -0.12906187 |
| O  | 0.52476524  | -0.82539005 | -0.77442533 |
| O  | -2.08114630 | -1.17590088 | -0.18218882 |
| Si | -3.02401342 | -0.32676885 | -1.24293759 |
| O  | -2.09138006 | 0.19814482  | -2.49449763 |
| O  | 2.74368536  | 0.04152091  | -1.98729907 |
| O  | -3.72185208 | 0.93943354  | -0.45300649 |
| O  | -0.04893795 | 3.71334811  | -0.37856629 |
| O  | -4.17460274 | -1.29720606 | -1.90437953 |
| O  | -1.91823592 | 5.35627808  | -1.37942747 |
| O  | -1.22147089 | 1.58512344  | -4.61180453 |
| H  | -4.91779529 | -1.51102697 | -1.33884357 |
| Si | -1.92196881 | 6.23978311  | -2.81783468 |
| Si | -2.13139854 | 0.89802473  | -5.85719853 |
| Si | -0.68453751 | -0.36282144 | 5.12472173  |
| Si | -0.97101096 | -4.35302027 | 0.49201167  |
| H  | -0.04678831 | -5.38864130 | 1.03149221  |
| H  | -2.28737073 | -4.41386581 | 1.19213745  |
| H  | -1.16435815 | -4.53668504 | -0.97623295 |
| H  | -0.86312969 | 0.22696455  | 6.48093533  |
| H  | -1.72404749 | -1.40323576 | 4.86851950  |
| H  | 0.67653710  | -0.95922127 | 4.99165458  |
| H  | -1.70914996 | 1.58382370  | -7.11041045 |



|    |             |             |             |
|----|-------------|-------------|-------------|
| H  | -1.84736599 | -0.56373445 | -5.93966974 |
| H  | -3.58373974 | 1.12529547  | -5.60162509 |
| H  | -1.98362213 | 7.67751915  | -2.43261604 |
| H  | -0.67652837 | 5.95765940  | -3.58966586 |
| H  | -3.11994217 | 5.86804359  | -3.62574182 |
| Si | 3.77280200  | 3.75633087  | 1.29191240  |
| H  | 4.21211896  | 4.97326225  | 2.02985814  |
| H  | 4.20014060  | 2.52405361  | 2.01733530  |
| H  | 4.32976247  | 3.75330179  | -0.09169935 |
| Si | 3.66763861  | -1.37142514 | -1.97481632 |
| H  | 2.95596997  | -2.44206226 | -2.73162925 |
| H  | 4.95983068  | -1.03746735 | -2.63590924 |
| H  | 3.89805203  | -1.80841208 | -0.56659475 |
| H  | -5.32260559 | 3.57004499  | 1.32934154  |
| O  | -4.83882761 | 2.46339161  | 1.48715405  |
| H  | -5.66795993 | 4.45633921  | 1.69064841  |
| H  | -3.48140563 | 3.84002974  | 3.49481469  |
| H  | -6.10748331 | 2.80133158  | 3.98552494  |
| Al | -5.03933884 | 3.67651445  | 3.18864097  |
| N  | -5.57543638 | 5.52496458  | 4.09412041  |
| C  | -5.25268109 | 5.39590278  | 5.52564704  |
| H  | -5.49665361 | 6.32026010  | 6.06248573  |
| H  | -5.82381379 | 4.57108992  | 5.95511140  |
| H  | -4.18776519 | 5.18727486  | 5.64169765  |
| C  | -4.79203548 | 6.62212659  | 3.50193480  |
| H  | -3.72793758 | 6.41081086  | 3.61491072  |
| H  | -5.02207815 | 6.70380860  | 2.43837327  |
| H  | -5.02570776 | 7.57368801  | 3.99422986  |
| C  | -7.01519635 | 5.78138641  | 3.92618119  |
| H  | -7.24668473 | 5.87289638  | 2.86383694  |
| H  | -7.58314564 | 4.94734069  | 4.34085119  |
| H  | -7.30618591 | 6.70684697  | 4.43730334  |

**B<sup>0</sup>\_AlH<sub>3</sub>NMe<sub>3</sub>\_TS\_HH (N/O *trans*) product / H<sub>2</sub> adduct**

E: -1751.01278486 ; H: -1750.534295 ; G: -1750.687260

|    |             |             |             |
|----|-------------|-------------|-------------|
| O  | -0.82214642 | 0.91761927  | 4.17997383  |
| Si | -0.97681646 | 1.07260021  | 2.56442262  |
| O  | -0.18556032 | 2.44016107  | 2.09245626  |
| Si | 0.65840310  | 3.09162707  | 0.83360517  |
| O  | 1.81342414  | 4.08857560  | 1.40872043  |
| O  | -0.31514340 | -0.23584175 | 1.80531554  |
| Si | -0.52124051 | -1.13977701 | 0.44397121  |
| O  | -0.10562861 | -2.68287963 | 0.76569790  |
| O  | -2.56908827 | 1.17577634  | 2.16543259  |
| Si | -3.62661633 | 1.91389643  | 1.12271787  |
| O  | -2.86796334 | 3.27381028  | 0.54321670  |
| Si | -1.93850754 | 3.93981905  | -0.63268489 |
| O  | -2.07974455 | 3.06920586  | -2.02955539 |
| Si | -1.47855593 | 1.72978366  | -2.78079470 |
| O  | 0.11619220  | 1.57090171  | -2.39591072 |
| Si | 1.12145495  | 0.85693236  | -1.30627024 |
| O  | 1.37157262  | 1.88571668  | -0.04127078 |
| O  | 0.44751907  | -0.54526116 | -0.75227457 |
| O  | -2.09515110 | -1.08621451 | -0.05096020 |
| Si | -3.14509560 | -0.26803310 | -1.03168890 |
| O  | -2.30479020 | 0.39018472  | -2.28610088 |
| O  | 2.54565775  | 0.51796831  | -2.02307738 |
| O  | -3.90959079 | 0.89437857  | -0.15041628 |
| O  | -0.36973549 | 3.95237895  | -0.12416182 |
| O  | -4.24048518 | -1.29343986 | -1.70260080 |
| O  | -2.42733307 | 5.47212954  | -0.91007563 |
| O  | -1.63604185 | 1.90400456  | -4.39220083 |
| H  | -4.96864506 | -1.55815265 | -1.13913757 |
| Si | -3.05483414 | 6.32117940  | -2.22871458 |
| Si | -2.43489737 | 1.10215726  | -5.64589642 |
| Si | -1.78792031 | 0.43815104  | 5.47978155  |

|    |             |             |             |
|----|-------------|-------------|-------------|
| Si | -0.65323267 | -4.21431626 | 0.31286994  |
| H  | 0.32596448  | -5.19274617 | 0.86111024  |
| H  | -2.00822028 | -4.44962368 | 0.89149271  |
| H  | -0.71055198 | -4.30676713 | -1.17539051 |
| H  | -2.39133767 | 1.65491310  | 6.09744129  |
| H  | -2.85679360 | -0.48869504 | 5.01069701  |
| H  | -0.89084566 | -0.24159568 | 6.45683907  |
| H  | -2.10042076 | 1.84145423  | -6.89491707 |
| H  | -1.95231561 | -0.30695478 | -5.72719407 |
| H  | -3.90552026 | 1.12838908  | -5.39904048 |
| H  | -3.24162503 | 7.72546833  | -1.76730168 |
| H  | -2.09282169 | 6.26671881  | -3.36689884 |
| H  | -4.36333423 | 5.72739350  | -2.62955687 |
| Si | 3.50019688  | 4.06195607  | 1.50237882  |
| H  | 3.89594227  | 5.27563041  | 2.26965640  |
| H  | 3.94336808  | 2.82705592  | 2.21320958  |
| H  | 4.07720639  | 4.09843463  | 0.12792367  |
| Si | 3.58150129  | -0.81493747 | -2.08567750 |
| H  | 2.90787585  | -1.93937048 | -2.79746151 |
| H  | 4.79186729  | -0.37271965 | -2.83220342 |
| H  | 3.94442543  | -1.23172468 | -0.69953380 |
| H  | -5.86695142 | 3.88713722  | 0.02150585  |
| O  | -4.98213268 | 2.33104245  | 1.87282602  |
| H  | -6.08535857 | 4.35720219  | -0.51530907 |
| H  | -4.94855401 | 2.06401858  | 4.70347198  |
| H  | -7.00143802 | 3.45386823  | 3.45606259  |
| Al | -5.49331880 | 2.92741364  | 3.47068335  |
| N  | -4.41864941 | 4.67150199  | 3.68549416  |
| C  | -4.91322749 | 5.31604937  | 4.91929640  |
| H  | -4.38183011 | 6.25721095  | 5.09678456  |
| H  | -5.98089199 | 5.51872388  | 4.82280120  |
| H  | -4.75063690 | 4.64888516  | 5.76803164  |
| C  | -2.97223793 | 4.39608104  | 3.82304922  |
| H  | -2.81106221 | 3.68586773  | 4.63491501  |
| H  | -2.58350831 | 3.98177348  | 2.89378371  |
| H  | -2.43140413 | 5.32327752  | 4.04112583  |
| C  | -4.65164430 | 5.55724070  | 2.52477139  |
| H  | -4.26825899 | 5.08030870  | 1.62350951  |
| H  | -5.72231101 | 5.73387001  | 2.41051800  |
| H  | -4.14029725 | 6.51526880  | 2.66981459  |

### **B<sup>0</sup>** AlH<sub>3</sub>NMe<sub>3</sub> TS HH (N/O *cis*) adduct

E: -1750.97670965 ; H: -1750.493834 ; G: -1750.645426

|    |             |             |             |
|----|-------------|-------------|-------------|
| O  | -0.74533208 | 1.37750803  | 3.50986223  |
| Si | -0.80724937 | 1.27097317  | 1.88300929  |
| O  | 0.70251251  | 1.51103116  | 1.26031270  |
| Si | 1.49778408  | 2.05738483  | -0.08552345 |
| O  | 2.94988853  | 2.64344664  | 0.36537896  |
| O  | -1.34110923 | -0.23384575 | 1.46301968  |
| Si | -1.22537783 | -1.38918572 | 0.29540240  |
| O  | -1.44089074 | -2.85446467 | 0.98344781  |
| O  | -1.85404006 | 2.40161405  | 1.31286232  |
| Si | -2.88734192 | 2.71607150  | 0.05825184  |
| O  | -2.05942851 | 3.46114794  | -1.15322043 |
| Si | -0.58770896 | 3.50336286  | -1.89937182 |
| O  | -0.51778190 | 2.32935820  | -3.05359663 |
| Si | -1.03032504 | 0.82413098  | -3.49751737 |
| O  | 0.00472524  | -0.31189909 | -2.90134644 |
| Si | 1.05799570  | -0.60114862 | -1.66285879 |
| O  | 1.71337737  | 0.82117895  | -1.14990621 |
| O  | 0.26019277  | -1.31197439 | -0.40858409 |
| O  | -2.40602601 | -1.15735833 | -0.83409396 |
| Si | -3.31649859 | 0.02798256  | -1.54620765 |
| O  | -2.54146326 | 0.54958731  | -2.90202922 |
| O  | 2.23878166  | -1.59479140 | -2.18453353 |
| O  | -3.48544798 | 1.26794349  | -0.46941636 |

|    |             |             |             |
|----|-------------|-------------|-------------|
| O  | 0.60696036  | 3.24647992  | -0.79517097 |
| O  | -0.38179251 | 4.96170265  | -2.59514100 |
| O  | -1.05425828 | 0.72967154  | -5.12399495 |
| Si | -1.30960357 | 6.35415180  | -2.82879406 |
| Si | -0.81851701 | 1.80636157  | -6.40447624 |
| Si | 0.45004393  | 1.36803291  | 4.70203800  |
| Si | -2.39902296 | -4.20103896 | 0.63984237  |
| H  | -1.97177912 | -5.27560566 | 1.57760703  |
| H  | -3.83240766 | -3.85155100 | 0.87222324  |
| H  | -2.20309743 | -4.62350932 | -0.77648971 |
| H  | 1.39282261  | 2.50161516  | 4.47257682  |
| H  | -0.25294598 | 1.52390530  | 6.00521198  |
| H  | 1.19112460  | 0.07332705  | 4.65794345  |
| H  | 0.60369633  | 2.25626299  | -6.41955510 |
| H  | -1.14299604 | 1.05667171  | -7.64912326 |
| H  | -1.72527887 | 2.98082294  | -6.24728169 |
| H  | -1.82510472 | 6.84275176  | -1.51765660 |
| H  | -0.40174689 | 7.36235173  | -3.44356395 |
| H  | -2.44430394 | 6.04489329  | -3.74691316 |
| Si | 3.68961268  | 3.07844530  | 1.81964596  |
| H  | 2.85838537  | 4.10318929  | 2.51713130  |
| H  | 3.83309880  | 1.87122564  | 2.68539265  |
| H  | 5.02511916  | 3.63382531  | 1.46786206  |
| Si | 2.76401365  | -2.17747034 | -3.68136064 |
| H  | 1.72845571  | -3.08660260 | -4.25118701 |
| H  | 3.00862773  | -1.03330989 | -4.60741100 |
| H  | 4.02801636  | -2.92094984 | -3.42180288 |
| H  | -5.52185200 | -0.14310125 | -1.44876440 |
| O  | -4.79216393 | -0.57679532 | -1.91916838 |
| H  | -4.84699260 | 3.26945289  | 0.95255973  |
| O  | -4.10111586 | 3.70926415  | 0.51764643  |
| H  | -6.49908647 | 0.63921269  | -0.40491158 |
| H  | -8.34385022 | 0.88328649  | 1.55621212  |
| H  | -6.00356318 | 2.28114110  | 1.70529788  |
| Al | -6.80469854 | 1.00280421  | 1.13037854  |
| N  | -5.93328527 | -0.54032530 | 2.18257990  |
| C  | -6.15011684 | -1.80272894 | 1.44364168  |
| H  | -5.63179933 | -1.75703680 | 0.48525809  |
| H  | -5.76718075 | -2.65060498 | 2.02142787  |
| H  | -7.21751082 | -1.94622814 | 1.26490338  |
| C  | -6.57488803 | -0.62431353 | 3.51246320  |
| H  | -6.44734601 | 0.32387591  | 4.03800171  |
| H  | -7.63986157 | -0.82337659 | 3.39460311  |
| H  | -6.11449278 | -1.42499182 | 4.10130993  |
| C  | -4.48207252 | -0.31363082 | 2.35606345  |
| H  | -4.00575972 | -0.21515356 | 1.38351441  |
| H  | -4.32186639 | 0.60636223  | 2.91888059  |
| H  | -4.02940088 | -1.15148656 | 2.89623841  |

### **B<sup>0</sup>** AlH<sub>3</sub>NMe<sub>3</sub>\_TS\_HH (N/O *cis*) TS

E: -1750.94547766 ; H: -1750.466783 ; G: -1750.614298

|    |             |             |             |
|----|-------------|-------------|-------------|
| O  | -0.32202132 | 1.27113222  | 3.62770889  |
| Si | -0.62303207 | 1.24794941  | 2.02508488  |
| O  | 0.78649822  | 1.51371189  | 1.20549109  |
| Si | 1.50181631  | 2.08919431  | -0.17026776 |
| O  | 2.98068374  | 2.66610628  | 0.19374424  |
| O  | -1.22448003 | -0.23090196 | 1.59641747  |
| Si | -1.15879897 | -1.40299152 | 0.43713458  |
| O  | -1.16442141 | -2.87499412 | 1.13492179  |
| O  | -1.73233071 | 2.41217478  | 1.67686706  |
| Si | -2.78419574 | 2.74137941  | 0.44334932  |
| O  | -2.04832575 | 3.76908660  | -0.62112888 |
| Si | -0.78577021 | 3.58765346  | -1.67658295 |
| O  | -1.06983256 | 2.32123924  | -2.68756797 |
| Si | -1.37039170 | 0.84789553  | -3.34989134 |
| O  | -0.18291483 | -0.21202094 | -2.92349742 |

|    |             |             |             |
|----|-------------|-------------|-------------|
| Si | 0.93589468  | -0.53352527 | -1.75180056 |
| O  | 1.64589954  | 0.86885617  | -1.26645811 |
| O  | 0.20621708  | -1.24317566 | -0.45545604 |
| O  | -2.50394167 | -1.26350129 | -0.52748697 |
| Si | -3.32446767 | -0.02164262 | -1.23591157 |
| O  | -2.80743156 | 0.25271689  | -2.77162174 |
| O  | 2.06101220  | -1.54166546 | -2.35856658 |
| O  | -3.07224749 | 1.32385609  | -0.33984165 |
| O  | 0.59013259  | 3.29655615  | -0.81753780 |
| O  | -0.62013432 | 4.94507932  | -2.55769732 |
| O  | -1.45815147 | 0.97071128  | -4.96992241 |
| Si | -1.17487241 | 6.54040653  | -2.52867080 |
| Si | -1.30956622 | 2.23566683  | -6.08515754 |
| Si | 1.04073234  | 1.08317143  | 4.60689952  |
| Si | -2.15070432 | -3.77305186 | 2.16653554  |
| H  | -1.26126031 | -4.62555023 | 3.00165021  |
| H  | -2.94571689 | -2.84422548 | 3.02563144  |
| H  | -3.07281441 | -4.61055954 | 1.34632078  |
| H  | 2.00288633  | 2.19147280  | 4.33867002  |
| H  | 0.56268144  | 1.13363538  | 6.01617065  |
| H  | 1.68577376  | -0.23124707 | 4.31631568  |
| H  | 0.04092121  | 2.85501231  | -5.95393952 |
| H  | -1.48135752 | 1.62709046  | -7.43282154 |
| H  | -2.36976614 | 3.25205677  | -5.82487861 |
| H  | -0.88615946 | 7.14712397  | -1.19698723 |
| H  | -0.43502654 | 7.25872332  | -3.60324243 |
| H  | -2.64126086 | 6.55968297  | -2.79769405 |
| Si | 3.94882485  | 2.83298968  | 1.56594143  |
| H  | 3.37061031  | 3.88178137  | 2.45600931  |
| H  | 4.01331352  | 1.53099521  | 2.29258371  |
| H  | 5.29974086  | 3.23763930  | 1.08868486  |
| Si | 2.38619902  | -2.24224432 | -3.86219786 |
| H  | 1.21512390  | -3.05551568 | -4.29894655 |
| H  | 2.66753534  | -1.16936149 | -4.86014419 |
| H  | 3.58383426  | -3.10624057 | -3.67141576 |
| H  | -5.58507273 | 0.24642506  | -1.85939721 |
| O  | -4.94112804 | -0.37973378 | -1.23598844 |
| H  | -4.97341366 | 2.89753639  | 0.81447140  |
| O  | -4.16611416 | 3.39242209  | 1.02504130  |
| H  | -6.56092210 | 0.94336509  | -1.86845184 |
| H  | -7.94091394 | -0.41027193 | -0.18673776 |
| H  | -6.27153964 | 1.81103527  | 0.55286609  |
| Al | -6.56314522 | 0.39856218  | -0.17463591 |
| N  | -5.89580894 | -0.70544808 | 1.56644724  |
| C  | -5.70283421 | -2.12878906 | 1.23593218  |
| H  | -4.86154560 | -2.23598283 | 0.55166783  |
| H  | -5.51117351 | -2.71203352 | 2.14421347  |
| H  | -6.60136543 | -2.51264566 | 0.74971687  |
| C  | -7.00514958 | -0.57262049 | 2.53012682  |
| H  | -7.17744727 | 0.48411446  | 2.74555133  |
| H  | -7.91420375 | -0.99922633 | 2.10694593  |
| H  | -6.76157648 | -1.09068227 | 3.46505014  |
| C  | -4.67426615 | -0.16225700 | 2.18490616  |
| H  | -3.82589033 | -0.28543362 | 1.51721349  |
| H  | -4.81193305 | 0.89902266  | 2.39402820  |
| H  | -4.45203807 | -0.68235585 | 3.12376838  |

**B<sup>0</sup>\_AlH<sub>3</sub>NMe<sub>3</sub>\_TS\_HH (N/O *cis*) product / H<sub>2</sub> adduct**

E: -1751.01332645 ; H: -1750.533378 ; G: -1750.684052

|    |             |             |             |
|----|-------------|-------------|-------------|
| O  | -0.16241755 | 1.09870271  | 3.66131696  |
| Si | -0.50956864 | 1.11031368  | 2.06585684  |
| O  | 0.88121558  | 1.40391147  | 1.22129641  |
| Si | 1.55532096  | 1.99597148  | -0.16869265 |
| O  | 3.03933761  | 2.58249479  | 0.16381698  |
| O  | -1.12589090 | -0.35778611 | 1.63306754  |
| Si | -1.08435894 | -1.50443305 | 0.44187026  |

|    |             |             |             |
|----|-------------|-------------|-------------|
| O  | -1.06040686 | -2.98679401 | 1.13012784  |
| O  | -1.62217613 | 2.28955359  | 1.77004233  |
| Si | -2.70403588 | 2.60065828  | 0.55749027  |
| O  | -2.02005815 | 3.66781697  | -0.50752428 |
| Si | -0.78428937 | 3.49955412  | -1.59761165 |
| O  | -1.08666024 | 2.25517616  | -2.62754833 |
| Si | -1.40374870 | 0.77541971  | -3.27835144 |
| O  | -0.18259977 | -0.26787979 | -2.90004436 |
| Si | 0.96530830  | -0.60455252 | -1.76396387 |
| O  | 1.69271118  | 0.79268908  | -1.28170991 |
| O  | 0.28105566  | -1.32827735 | -0.45202504 |
| O  | -2.43487205 | -1.36874527 | -0.49577347 |
| Si | -3.34088636 | -0.13325406 | -1.14641754 |
| O  | -2.81855232 | 0.16769049  | -2.68686776 |
| O  | 2.07645000  | -1.60226230 | -2.41525153 |
| O  | -2.97946977 | 1.20074864  | -0.24123310 |
| O  | 0.61310432  | 3.20148885  | -0.77614225 |
| O  | -0.64070965 | 4.87917311  | -2.45233978 |
| O  | -1.51666753 | 0.91849992  | -4.89955382 |
| Si | -1.31076367 | 6.42878875  | -2.43297737 |
| Si | -1.35538759 | 2.19933414  | -5.98942560 |
| Si | 1.23722413  | 1.25107609  | 4.59120063  |
| Si | -2.12191951 | -3.93402987 | 2.02898058  |
| H  | -1.30208636 | -4.81502162 | 2.90574460  |
| H  | -3.00178967 | -3.05169583 | 2.85729467  |
| H  | -2.96599918 | -4.74701941 | 1.10597305  |
| H  | 1.88136243  | 2.56857287  | 4.31320835  |
| H  | 0.81111063  | 1.16786428  | 6.01603116  |
| H  | 2.18326660  | 0.14483904  | 4.26344817  |
| H  | -0.00307896 | 2.81343378  | -5.84720715 |
| H  | -1.52486935 | 1.61832181  | -7.35024840 |
| H  | -2.41057561 | 3.22014037  | -5.72173785 |
| H  | -1.06177640 | 7.06746872  | -1.10797783 |
| H  | -0.63053141 | 7.19191185  | -3.51645024 |
| H  | -2.77650728 | 6.34364233  | -2.69599379 |
| Si | 3.90202433  | 3.08045122  | 1.52502056  |
| H  | 3.13976909  | 4.14600075  | 2.24040355  |
| H  | 4.11193464  | 1.91506190  | 2.43349984  |
| H  | 5.20598386  | 3.60536844  | 1.03471664  |
| Si | 2.37603412  | -2.26605586 | -3.93915770 |
| H  | 1.19751906  | -3.06659923 | -4.37980410 |
| H  | 2.64751053  | -1.17192860 | -4.91682767 |
| H  | 3.57387841  | -3.13811130 | -3.78787539 |
| H  | -5.83993192 | 1.36185355  | -2.93162926 |
| O  | -4.91106579 | -0.47031950 | -1.07466724 |
| H  | -4.88870093 | 2.82147065  | 0.83799771  |
| O  | -4.08263972 | 3.20950432  | 1.20711575  |
| H  | -6.36818038 | 1.88812523  | -2.91013457 |
| H  | -7.69688772 | -0.38618909 | -0.58887023 |
| H  | -6.13599315 | 1.72899540  | 0.25059543  |
| Al | -6.27723648 | 0.17280379  | -0.13821380 |
| N  | -5.97635777 | -0.72296421 | 1.68670718  |
| C  | -5.88881642 | -2.18537298 | 1.48733011  |
| H  | -5.04883803 | -2.40844739 | 0.82869522  |
| H  | -5.74985136 | -2.69123773 | 2.44864833  |
| H  | -6.80710577 | -2.54531690 | 1.02068477  |
| C  | -7.13615413 | -0.39717478 | 2.54200684  |
| H  | -7.19824790 | 0.68437970  | 2.67622067  |
| H  | -8.05205456 | -0.75136063 | 2.06705980  |
| H  | -7.03038897 | -0.87296375 | 3.52255100  |
| C  | -4.73768246 | -0.23260682 | 2.32814313  |
| H  | -3.87457149 | -0.48739044 | 1.71422685  |
| H  | -4.78767523 | 0.85057447  | 2.44384300  |
| H  | -4.61346549 | -0.69280808 | 3.31407692  |

AC\_AIH<sub>2</sub>NMe<sub>3</sub>

E: -1749.83286459 ; H: -1749.368999 ; G: -1749.523009

|    |             |             |             |
|----|-------------|-------------|-------------|
| O  | -0.15763069 | 0.62707906  | 4.17126831  |
| Si | -0.43569732 | 0.77433951  | 2.57040603  |
| O  | 0.41364827  | 2.05335679  | 1.97004035  |
| Si | 1.16461418  | 2.58925166  | 0.60639764  |
| O  | 2.41159041  | 3.55486119  | 1.02176865  |
| O  | 0.04715244  | -0.60355370 | 1.80172100  |
| Si | -0.26022355 | -1.59546412 | 0.51886439  |
| O  | 0.15936051  | -3.12489808 | 0.90754297  |
| O  | -2.04721921 | 1.02592203  | 2.34413380  |
| Si | -3.10098085 | 1.67421919  | 1.24858230  |
| O  | -2.41134242 | 3.02274264  | 0.59017628  |
| Si | -1.51052640 | 3.50519208  | -0.70271977 |
| O  | -1.80855796 | 2.52925534  | -1.99962341 |
| Si | -1.30753117 | 1.14127839  | -2.74185192 |
| O  | 0.31208889  | 0.95125489  | -2.49738721 |
| Si | 1.35155888  | 0.23302736  | -1.44176677 |
| O  | 1.74906471  | 1.30624069  | -0.25495181 |
| O  | 0.64649633  | -1.09998252 | -0.76619784 |
| O  | -1.86404697 | -1.55100114 | 0.15007418  |
| Si | -2.93821844 | -0.71564995 | -0.79778117 |
| O  | -2.11270506 | -0.14681217 | -2.11646735 |
| O  | 2.70509551  | -0.22060999 | -2.23024296 |
| O  | -4.52843922 | 2.04313904  | 1.98193676  |
| O  | -3.46752810 | 0.59479176  | 0.07514684  |
| O  | 0.08897863  | 3.43163784  | -0.31287164 |
| O  | -4.17588515 | -1.64312287 | -1.22642741 |
| O  | -1.91322292 | 5.03953053  | -1.08245955 |
| O  | -1.59202234 | 1.25450017  | -4.34334592 |
| H  | -4.48141403 | 2.66533941  | 2.70894722  |
| Si | -2.17554794 | 5.91333777  | -2.50173704 |
| Si | -2.80775567 | 0.77451324  | -5.41370261 |
| Si | 0.97194322  | -0.18324392 | 5.13024464  |
| Si | -0.68799419 | -4.56800130 | 1.13544046  |
| H  | 0.29615942  | -5.55413329 | 1.66285321  |
| H  | -1.78757080 | -4.35526786 | 2.12222373  |
| H  | -1.24936142 | -5.03530546 | -0.16498787 |
| H  | 0.97954587  | 0.50144595  | 6.45293561  |
| H  | 0.55665714  | -1.60794589 | 5.28226920  |
| H  | 2.31944428  | -0.10820829 | 4.49352482  |
| H  | -2.29574947 | 1.06788080  | -6.78235680 |
| H  | -3.07335937 | -0.68426719 | -5.25332650 |
| H  | -4.04777701 | 1.55758194  | -5.14276801 |
| H  | -2.20161760 | 7.35141753  | -2.11492141 |
| H  | -1.07181915 | 5.65157536  | -3.47109885 |
| H  | -3.48341617 | 5.51175350  | -3.09738976 |
| Si | 4.04917364  | 3.63952581  | 0.61651057  |
| H  | 4.58912519  | 4.84879442  | 1.29824320  |
| H  | 4.74861080  | 2.41343679  | 1.09962077  |
| H  | 4.19596020  | 3.76244902  | -0.86281774 |
| Si | 3.52588514  | -1.67315859 | -2.48849656 |
| H  | 2.60323766  | -2.67336286 | -3.09982350 |
| H  | 4.64863385  | -1.36161119 | -3.41639946 |
| H  | 4.04978441  | -2.18935361 | -1.19023092 |
| H  | -5.99962896 | -2.99286173 | -2.90701818 |
| H  | -5.54031681 | -0.28646994 | -3.31334919 |
| Al | -5.55731985 | -1.56358921 | -2.34613539 |
| N  | -7.06759902 | -1.11236338 | -1.03496347 |
| C  | -6.81745700 | 0.20392274  | -0.40980753 |
| H  | -5.88076648 | 0.17601333  | 0.14497242  |
| H  | -6.74296318 | 0.96694707  | -1.18591946 |
| H  | -7.63546950 | 0.46012027  | 0.27220092  |
| C  | -8.33527723 | -1.07615594 | -1.79010737 |
| H  | -8.50508322 | -2.04326316 | -2.26628323 |
| H  | -9.17188633 | -0.85233771 | -1.11929536 |
| H  | -8.27834610 | -0.30443099 | -2.55982157 |
| C  | -7.13146342 | -2.15561024 | 0.00904089  |

H -7.32015016 -3.12442071 -0.45590855  
H -6.17789368 -2.19528770 0.53584631  
H -7.93357711 -1.93201854 0.72086816

### **B<sup>0</sup>\_AlH<sub>2</sub>NMe<sub>3</sub>\_TS\_HH adduct**

E: -1749.83281142 ; H: -1749.368777 ; G: -1749.518749

O 0.23162519 0.91002728 3.51545706  
Si -0.22836804 0.97110835 1.95129428  
O 0.87508498 1.81865084 1.07639665  
Si 1.63744788 2.58007344 -0.16306086  
O 2.78596930 3.58768065 0.40179704  
O -0.32927239 -0.57664947 1.37102276  
Si -0.06036934 -1.56441845 0.08330678  
O 0.32525482 -3.04522904 0.65048616  
O -1.69088223 1.72948662 1.85085705  
Si -2.61968372 2.02924058 0.51154919  
O -2.01425946 3.36304720 -0.27956161  
Si -0.99403300 3.59363932 -1.55289328  
O -1.31347367 2.52117965 -2.77338365  
Si -0.93571095 1.05608530 -3.42453657  
O 0.56173223 0.58670884 -2.92983601  
Si 1.76119027 0.10915643 -1.91349426  
O 2.34462607 1.43109050 -1.12149279  
O 1.19397507 -0.98782560 -0.82086096  
O -1.40366533 -1.68999835 -0.87666693  
Si -2.48201979 -0.57558488 -1.44521897  
O -2.03666570 -0.09470771 -2.97154365  
O 2.97453756 -0.57463229 -2.76421053  
O -4.17389245 2.22959411 0.86873836  
O -2.33565913 0.76652788 -0.51576197  
O 0.56794656 3.45210649 -1.05860695  
O -1.25280062 5.09677983 -2.14599261  
O -0.96912967 1.20644421 -5.05018289  
Si -1.70735887 5.68953726 -3.65827913  
Si -0.92909093 0.15301497 -6.36776635  
Si 0.59475408 -0.31382976 4.61953898  
Si 0.38393060 -4.62087680 0.05257724  
H 1.11387018 -5.43421320 1.06442469  
H -1.00167784 -5.13842861 -0.13652518  
H 1.11696774 -4.63309152 -1.24929664  
H 0.99846292 0.36544625 5.88224654  
H -0.61041193 -1.16333237 4.84672957  
H 1.71542488 -1.14836835 4.09564213  
H -0.25108702 0.87161903 -7.48295052  
H -0.17110978 -1.08142103 -6.00565766  
H -2.32691028 -0.19870197 -6.75167882  
H -1.69237528 7.17528062 -3.55420627  
H -0.75673985 5.22204977 -4.70710548  
H -3.08827205 5.21505763 -3.97945570  
Si 4.35463000 3.45123483 1.00914794  
H 4.52856892 4.53429646 2.01704079  
H 4.53515091 2.11245316 1.64511666  
H 5.32386106 3.61990644 -0.11103886  
Si 3.49522377 -2.15900203 -3.02636340  
H 2.33938816 -3.00332191 -3.45261124  
H 4.52052386 -2.09628824 -4.10420668  
H 4.08473278 -2.70791501 -1.77055800  
N -6.10543591 3.63764398 -0.88490324  
C -6.15860476 4.75072830 0.08766174  
H -5.20408910 4.81686968 0.61073124  
H -6.35602953 5.69587543 -0.42902156  
H -6.95128980 4.56394450 0.81357595  
C -5.03810486 3.89882461 -1.87552654  
H -4.09510288 4.05820562 -1.35395109  
H -4.93995046 3.04463636 -2.54786542  
H -5.28136056 4.79170092 -2.46104741

|    |             |             |             |
|----|-------------|-------------|-------------|
| C  | -7.40627636 | 3.50305249  | -1.57240188 |
| H  | -7.35368821 | 2.68993263  | -2.29856352 |
| H  | -8.18556349 | 3.28044207  | -0.84155093 |
| H  | -7.65793673 | 4.43256709  | -2.09367268 |
| O  | -3.97730833 | -1.24377095 | -1.43386719 |
| H  | -4.69660354 | -0.60041632 | -1.37029511 |
| H  | -5.65147742 | 0.84285376  | -1.09468211 |
| H  | -6.96754426 | 1.79623730  | 1.13807022  |
| Al | -5.74799225 | 1.89749217  | 0.12223508  |

### **B<sup>0</sup>\_AlH<sub>2</sub>NMe<sub>3</sub>\_TS\_HH TS**

E: -1749.80136550 ; H: -1749.341769 ; G: -1749.486634

|    |             |             |             |
|----|-------------|-------------|-------------|
| O  | 0.05957988  | 1.30614372  | 3.43653695  |
| Si | -0.24178575 | 1.32478655  | 1.83170747  |
| O  | 1.05930691  | 1.93451775  | 1.02914986  |
| Si | 1.86049968  | 2.52489179  | -0.27924799 |
| O  | 3.12008707  | 3.43732723  | 0.21168559  |
| O  | -0.52559843 | -0.23979596 | 1.35483293  |
| Si | -0.40443233 | -1.30002240 | 0.09833883  |
| O  | -0.19322721 | -2.78962201 | 0.73427216  |
| O  | -1.54561002 | 2.31823959  | 1.56934928  |
| Si | -2.28900269 | 2.52446394  | 0.10126301  |
| O  | -1.71756239 | 3.85872523  | -0.70541826 |
| Si | -0.56309576 | 3.83231643  | -1.89660337 |
| O  | -0.93834989 | 2.76713617  | -3.11607210 |
| Si | -0.71757247 | 1.22059103  | -3.64609608 |
| O  | 0.71412722  | 0.61018078  | -3.10834361 |
| Si | 1.70704823  | -0.00114257 | -1.94945704 |
| O  | 2.43477165  | 1.24716713  | -1.15869332 |
| O  | 0.87988907  | -0.93090167 | -0.86869818 |
| O  | -1.77273568 | -1.32993823 | -0.85576757 |
| Si | -2.42685153 | 0.00611221  | -1.58019436 |
| O  | -1.94180472 | 0.19828684  | -3.15479588 |
| O  | 2.85803997  | -0.91961437 | -2.65416403 |
| O  | -3.89715706 | 2.49463597  | 0.18055203  |
| O  | -1.67177936 | 1.26286502  | -0.80002601 |
| O  | 0.89118542  | 3.44583802  | -1.23178297 |
| O  | -0.49428406 | 5.32496806  | -2.55813925 |
| O  | -0.72196579 | 1.26333391  | -5.27949396 |
| Si | -0.38728363 | 5.91298194  | -4.13647750 |
| Si | -0.72275250 | 0.12398937  | -6.52307489 |
| Si | 0.43440658  | 0.11352327  | 4.56971507  |
| Si | -0.16603916 | -4.37317253 | 0.15524478  |
| H  | 0.54911438  | -5.19202401 | 1.17328205  |
| H  | -1.56293206 | -4.86361565 | -0.02379112 |
| H  | 0.56298600  | -4.41526239 | -1.14848298 |
| H  | 0.83367912  | 0.82544384  | 5.81593874  |
| H  | -0.76471661 | -0.73809306 | 4.81943074  |
| H  | 1.56118960  | -0.72716927 | 4.06792920  |
| H  | -0.03179482 | 0.74574101  | -7.68692212 |
| H  | -0.00136661 | -1.10705408 | -6.08255449 |
| H  | -2.13275418 | -0.21138858 | -6.87840291 |
| H  | -0.08345054 | 7.36729019  | -4.02785675 |
| H  | 0.69979054  | 5.20476327  | -4.87335091 |
| H  | -1.69135518 | 5.70892395  | -4.83380602 |
| Si | 4.69323941  | 3.18119243  | 0.75893596  |
| H  | 4.99142095  | 4.24797049  | 1.75575882  |
| H  | 4.79747415  | 1.83379124  | 1.39429125  |
| H  | 5.63186167  | 3.27412899  | -0.39626005 |
| Si | 3.28363969  | -2.55107848 | -2.65016096 |
| H  | 2.22641965  | -3.34493053 | -3.34369152 |
| H  | 4.57506966  | -2.65497667 | -3.38463068 |
| H  | 3.43781142  | -3.03397594 | -1.24631651 |
| N  | -6.55706995 | 3.11237946  | -0.45181235 |
| C  | -6.71577387 | 3.57609016  | 0.94180287  |
| H  | -5.75134318 | 3.91110508  | 1.32260763  |



|    |             |            |             |
|----|-------------|------------|-------------|
| H  | -7.43515154 | 4.40094588 | 0.98817227  |
| H  | -7.07651905 | 2.75247206 | 1.56037901  |
| C  | -6.03574666 | 4.21240795 | -1.28629633 |
| H  | -5.06950440 | 4.53279946 | -0.89792592 |
| H  | -5.90863433 | 3.86204918 | -2.31205597 |
| H  | -6.73284749 | 5.05748527 | -1.28074927 |
| C  | -7.85915964 | 2.65769208 | -0.97322837 |
| H  | -7.74180289 | 2.31395071 | -2.00229446 |
| H  | -8.22684154 | 1.83113456 | -0.36295579 |
| H  | -8.58888704 | 3.47431030 | -0.94976207 |
| O  | -4.05269031 | 0.08536275 | -1.42408417 |
| H  | -4.78343936 | 0.77698777 | -2.11421119 |
| H  | -5.50018451 | 1.49092692 | -2.20538659 |
| H  | -6.09658269 | 0.52586186 | 0.47199049  |
| Al | -5.23759581 | 1.50005930 | -0.43034132 |

### **B<sup>0</sup>\_AlH<sub>2</sub>NMe<sub>3</sub>\_TS\_HH product / H<sub>2</sub> adduct**

E: -1749.86597608 ; H: -1749.404617 ; G: -1749.553352

|    |             |             |             |
|----|-------------|-------------|-------------|
| O  | 0.57242062  | 1.16725845  | 3.65533788  |
| Si | 0.04620404  | 1.30184792  | 2.11490789  |
| O  | 1.25163194  | 1.89587759  | 1.16686705  |
| Si | 1.87444248  | 2.56013368  | -0.20275588 |
| O  | 3.21788916  | 3.41066942  | 0.15569072  |
| O  | -0.39483021 | -0.21532256 | 1.60328527  |
| Si | -0.48307665 | -1.19904526 | 0.28163643  |
| O  | -0.24935084 | -2.73102705 | 0.79920776  |
| O  | -1.22271433 | 2.37290454  | 2.09531836  |
| Si | -2.17556516 | 2.67845137  | 0.77464870  |
| O  | -1.69057847 | 4.03875395  | -0.05010954 |
| Si | -0.70084160 | 4.04063409  | -1.38242295 |
| O  | -1.28705816 | 3.06484461  | -2.59277249 |
| Si | -1.21246213 | 1.54041093  | -3.22591557 |
| O  | 0.25046937  | 0.84738126  | -2.93424569 |
| Si | 1.38001736  | 0.14825316  | -1.96352001 |
| O  | 2.26509522  | 1.33349583  | -1.24054665 |
| O  | 0.68495257  | -0.80761852 | -0.81552295 |
| O  | -1.96264842 | -1.12935604 | -0.48186663 |
| Si | -2.67839663 | 0.27078371  | -1.00568648 |
| O  | -2.40623096 | 0.54626456  | -2.62353825 |
| O  | 2.37681501  | -0.77188580 | -2.87315064 |
| O  | -3.76098025 | 2.67971588  | 1.08599962  |
| O  | -1.75410564 | 1.45314388  | -0.27949925 |
| O  | 0.80976792  | 3.57067130  | -0.93923842 |
| O  | -0.66467685 | 5.56541482  | -1.97044578 |
| O  | -1.44863900 | 1.68718595  | -4.83687395 |
| Si | -0.84134403 | 6.24578152  | -3.50368311 |
| Si | -1.70887636 | 0.63611449  | -6.12921607 |
| Si | 0.84745344  | -0.12154180 | 4.70925443  |
| Si | -0.43707401 | -4.28502021 | 0.17368002  |
| H  | 0.18551246  | -5.21947391 | 1.15248133  |
| H  | -1.88735100 | -4.59090672 | 0.00777785  |
| H  | 0.25874622  | -4.37717632 | -1.14543133 |
| H  | 1.36922544  | 0.47183680  | 5.97266972  |
| H  | -0.42900834 | -0.85000352 | 4.96589495  |
| H  | 1.85565105  | -1.05063256 | 4.11961051  |
| H  | -1.02538758 | 1.21953441  | -7.31737442 |
| H  | -1.14821856 | -0.71064188 | -5.81094741 |
| H  | -3.17616703 | 0.53206593  | -6.37944490 |
| H  | -0.52775735 | 7.69516726  | -3.36411802 |
| H  | 0.09510959  | 5.59600600  | -4.46606907 |
| H  | -2.25000557 | 6.06700331  | -3.96831201 |
| Si | 4.77080301  | 3.11300144  | 0.73982373  |
| H  | 5.06816833  | 4.14735724  | 1.77066982  |
| H  | 4.83408507  | 1.74800586  | 1.34148489  |
| H  | 5.73374010  | 3.21846294  | -0.39348526 |

|    |             |             |             |
|----|-------------|-------------|-------------|
| Si | 2.64249766  | -2.42755382 | -3.05865452 |
| H  | 1.37536208  | -3.09504937 | -3.48284744 |
| H  | 3.68381977  | -2.57384710 | -4.11294913 |
| H  | 3.11503910  | -3.01243533 | -1.77000231 |
| N  | -5.79599741 | 2.89475303  | -1.04002017 |
| C  | -6.31498652 | 4.09966213  | -0.35531874 |
| H  | -5.49427812 | 4.60192011  | 0.15770097  |
| H  | -6.76420771 | 4.78358249  | -1.08250152 |
| H  | -7.06953685 | 3.80653661  | 0.37680206  |
| C  | -4.75280057 | 3.28393736  | -2.01489504 |
| H  | -3.94223670 | 3.79502521  | -1.49536746 |
| H  | -4.36728642 | 2.39254713  | -2.50922693 |
| H  | -5.17366858 | 3.95949813  | -2.76647093 |
| C  | -6.89492134 | 2.19313521  | -1.73863318 |
| H  | -6.49894940 | 1.30730078  | -2.23672424 |
| H  | -7.65276605 | 1.88858205  | -1.01510792 |
| H  | -7.35060495 | 2.85407870  | -2.48273825 |
| O  | -4.24349444 | 0.40168278  | -0.61920470 |
| H  | -5.28874509 | -0.72728045 | -2.65087618 |
| H  | -5.59634390 | -1.03695989 | -3.25618132 |
| H  | -6.25230550 | 1.23575308  | 1.27649567  |
| Al | -5.03284431 | 1.65785719  | 0.36995708  |

### **B<sup>0</sup>** AlH·NMe<sub>3</sub>

E: -1748.68855793 ; H: -1748.243079 ; G: -1748.388587

|    |             |             |             |
|----|-------------|-------------|-------------|
| O  | 0.22606762  | 0.87456383  | 3.79859836  |
| Si | -0.16992054 | 1.08254368  | 2.22916167  |
| O  | 1.10142691  | 1.74611945  | 1.42144320  |
| Si | 1.81281449  | 2.42648143  | 0.11034566  |
| O  | 3.13823315  | 3.24209611  | 0.59950334  |
| O  | -0.54072712 | -0.40849301 | 1.60067252  |
| Si | -0.55870045 | -1.34061405 | 0.24017793  |
| O  | -0.34665462 | -2.88951439 | 0.71240752  |
| O  | -1.45252894 | 2.13503891  | 2.15698398  |
| Si | -2.30214968 | 2.49976039  | 0.78341589  |
| O  | -1.76180525 | 3.89820048  | 0.06134102  |
| Si | -0.68191642 | 3.95273389  | -1.19872191 |
| O  | -1.18730218 | 3.03861368  | -2.49136571 |
| Si | -1.03959300 | 1.54711260  | -3.18879645 |
| O  | 0.41862705  | 0.87305925  | -2.83582378 |
| Si | 1.45351596  | 0.10680352  | -1.81187419 |
| O  | 2.27560912  | 1.23874592  | -0.94303240 |
| O  | 0.65977811  | -0.90587456 | -0.78384915 |
| O  | -1.99438154 | -1.24474527 | -0.60087480 |
| Si | -2.66202755 | 0.17593547  | -1.13571393 |
| O  | -2.24798253 | 0.50367919  | -2.71437395 |
| O  | 2.51948045  | -0.76894711 | -2.68594526 |
| O  | -3.90730961 | 2.48781893  | 0.97257304  |
| O  | -1.79765407 | 1.32836534  | -0.29435900 |
| O  | 0.79309324  | 3.45119954  | -0.67867175 |
| O  | -4.25223441 | 0.30093750  | -0.87846622 |
| O  | -0.59636340 | 5.50319939  | -1.71062113 |
| O  | -1.17668107 | 1.76692859  | -4.80365602 |
| Si | -0.76315290 | 6.26905645  | -3.20381888 |
| Si | -1.43845343 | 0.77010998  | -6.13851528 |
| Si | 0.48796726  | -0.45386502 | 4.80521626  |
| Si | -0.56287819 | -4.42478909 | 0.05059992  |
| H  | 0.04618373  | -5.39145520 | 1.00635598  |
| H  | -2.01885265 | -4.70169833 | -0.11671212 |
| H  | 0.12730800  | -4.49893704 | -1.27246308 |
| H  | 0.96141199  | 0.09152131  | 6.10852037  |
| H  | -0.78728486 | -1.20566004 | 4.99013480  |
| H  | 1.52509977  | -1.34638989 | 4.20981747  |
| H  | -0.73684601 | 1.39257228  | -7.29578074 |
| H  | -0.89708053 | -0.59492073 | -5.86902707 |
| H  | -2.90449330 | 0.69274976  | -6.40649508 |

|    |             |             |             |
|----|-------------|-------------|-------------|
| H  | -0.45672313 | 7.70881937  | -2.97801976 |
| H  | 0.18480844  | 5.67890096  | -4.19325571 |
| H  | -2.16669432 | 6.11151988  | -3.69149569 |
| Si | 4.56547096  | 3.78987276  | -0.11366970 |
| H  | 4.99032049  | 5.00434656  | 0.63742750  |
| H  | 5.60469095  | 2.72553356  | -0.01131220 |
| H  | 4.31723052  | 4.12559244  | -1.54752798 |
| Si | 2.86323287  | -2.41287392 | -2.84827243 |
| H  | 1.63913046  | -3.13957682 | -3.30097278 |
| H  | 3.93859545  | -2.52065397 | -3.87268031 |
| H  | 3.32505469  | -2.96616918 | -1.54212862 |
| H  | -6.41002916 | 1.05143712  | 0.88130992  |
| Al | -5.11780495 | 1.51170368  | 0.10298284  |
| N  | -5.75905039 | 2.81693643  | -1.30527187 |
| C  | -6.41830933 | 3.94625667  | -0.61293636 |
| H  | -5.69601218 | 4.44008589  | 0.03807901  |
| H  | -6.80170200 | 4.66539358  | -1.34377210 |
| H  | -7.24658694 | 3.57149083  | -0.00908141 |
| C  | -4.62381679 | 3.31927241  | -2.11082550 |
| H  | -3.90957963 | 3.82135352  | -1.45875861 |
| H  | -4.13822891 | 2.48390318  | -2.61450791 |
| H  | -4.98211978 | 4.03051485  | -2.86167556 |
| C  | -6.72662381 | 2.12454550  | -2.18409454 |
| H  | -6.23015670 | 1.29112087  | -2.68257329 |
| H  | -7.55508491 | 1.74155762  | -1.58581896 |
| H  | -7.11701384 | 2.81833846  | -2.93566978 |

## Bipodal site B<sup>I</sup>

### B<sup>I</sup>

E: -1659.33388314 ; H: -1658.943376 ; G: -1659.093481

|    |             |             |             |
|----|-------------|-------------|-------------|
| O  | -0.82249178 | 0.44950109  | 3.69655307  |
| Si | -0.79657296 | 0.60371109  | 2.07265043  |
| O  | 0.49394267  | 1.54632011  | 1.64475101  |
| Si | 1.43310062  | 1.95639494  | 0.35648837  |
| O  | 2.84738572  | 2.55557625  | 0.89936788  |
| O  | -0.62880152 | -0.89929227 | 1.41866595  |
| Si | -0.99147326 | -1.75037739 | 0.05615648  |
| O  | -1.06695672 | -3.33834951 | 0.42269359  |
| O  | -2.18174116 | 1.26492293  | 1.49426942  |
| Si | -2.93914748 | 2.68899773  | 1.12332933  |
| O  | -1.87558215 | 3.64566291  | 0.25830930  |
| Si | -0.89956592 | 3.34657292  | -1.02955989 |
| O  | -1.47061189 | 1.94345204  | -1.71843370 |
| Si | -1.12787834 | 1.02406721  | -3.04760640 |
| O  | 0.41253986  | 0.43104394  | -2.91910146 |
| Si | 1.20814179  | -0.41015625 | -1.73684799 |
| O  | 1.73582470  | 0.62092295  | -0.56951148 |
| O  | 0.17783025  | -1.52564432 | -1.08565871 |
| O  | -2.43218650 | -1.23387120 | -0.54959710 |
| Si | -3.24340775 | -0.87541519 | -1.92993812 |
| O  | -2.21745116 | -0.21161750 | -3.04978163 |
| O  | 2.48190367  | -1.18484130 | -2.39570587 |
| O  | -3.29709622 | 3.53358182  | 2.48186433  |
| O  | -4.31128049 | 2.36793916  | 0.29462275  |
| O  | 0.65872774  | 3.10083847  | -0.54917324 |
| O  | -3.94793208 | -2.18358281 | -2.61516782 |
| O  | -0.89379666 | 4.58243639  | -2.09318163 |
| O  | -1.24124072 | 1.89884539  | -4.42005948 |
| Si | -2.85836979 | 5.04444123  | 3.08610751  |
| Si | -3.40582389 | -3.51562076 | -3.50855352 |
| Si | -1.96545663 | 5.27334133  | -3.20088136 |
| Si | -0.21324964 | 2.29554940  | -5.70669165 |
| Si | -0.63087526 | 1.45869686  | 5.03446004  |
| Si | -0.83904894 | -4.27081799 | 1.81310258  |
| H  | -1.10856671 | -5.68182774 | 1.41922487  |
| H  | 0.56818775  | -4.12195111 | 2.28637435  |

|    |             |             |             |
|----|-------------|-------------|-------------|
| H  | -1.78775125 | -3.83142800 | 2.87604633  |
| H  | -1.70333643 | 1.11916611  | 6.01100411  |
| H  | 0.71417381  | 1.21296747  | 5.62826827  |
| H  | -0.75118761 | 2.88502742  | 4.60741288  |
| H  | 0.93723876  | 3.09211484  | -5.19168454 |
| H  | 0.26883017  | 1.04364970  | -6.35759724 |
| H  | -1.02861566 | 3.10324310  | -6.65503219 |
| H  | -2.12659930 | 6.71084972  | -2.84453171 |
| H  | -1.36594348 | 5.14181053  | -4.56016239 |
| H  | -3.27784362 | 4.56627428  | -3.14156334 |
| H  | -3.47015680 | 5.15173229  | 4.44122264  |
| H  | -1.37202491 | 5.14314605  | 3.18540519  |
| H  | -3.38032844 | 6.12145874  | 2.19444183  |
| H  | -4.40479769 | -4.60188932 | -3.31149553 |
| H  | -3.32074037 | -3.13524956 | -4.94770048 |
| H  | -2.06392751 | -3.93132033 | -3.00438926 |
| H  | -4.29954634 | 1.59736721  | -0.29515539 |
| O  | -4.42439171 | 0.20338472  | -1.47409999 |
| H  | -5.20782356 | 0.22851851  | -2.02671248 |
| Si | 2.98680443  | -2.79667811 | -2.46302872 |
| H  | 4.28926776  | -2.79900118 | -3.18439331 |
| H  | 3.15204527  | -3.32738944 | -1.07819188 |
| H  | 1.97535013  | -3.60584796 | -3.20281069 |
| Si | 4.46187308  | 2.51198036  | 0.40854429  |
| H  | 5.16734283  | 3.57903887  | 1.17097079  |
| H  | 5.04012622  | 1.17406044  | 0.72605916  |
| H  | 4.54830561  | 2.76964328  | -1.05869430 |

### **B<sup>I</sup>**\_AlH<sub>3</sub>\_NMe<sub>3</sub>\_TS\_HH (N/O *trans*) adduct

E: -1837.66392807 ; H: -1837.118015 ; G: -1837.282411

|    |             |             |             |
|----|-------------|-------------|-------------|
| O  | -1.17629665 | 1.09235253  | 4.29903347  |
| Si | -1.40707633 | 1.35406091  | 2.70532727  |
| O  | -0.03781833 | 2.00573727  | 2.05135243  |
| Si | 0.77238088  | 2.21363637  | 0.62814527  |
| O  | 2.35542505  | 2.43570207  | 0.94473049  |
| O  | -1.75072627 | -0.08597040 | 2.00075850  |
| Si | -2.47080587 | -0.82987223 | 0.71814431  |
| O  | -2.82341049 | -2.36706938 | 1.13688759  |
| O  | -2.66046463 | 2.40607089  | 2.44415849  |
| Si | -2.76035363 | 4.04969172  | 2.38851147  |
| O  | -1.87742138 | 4.68172849  | 1.15860825  |
| Si | -1.33574519 | 4.19470787  | -0.32327137 |
| O  | -2.34133074 | 3.00334161  | -0.87623682 |
| Si | -2.47963415 | 2.09027396  | -2.24867507 |
| O  | -1.13655668 | 1.12589858  | -2.36665901 |
| Si | -0.34526944 | 0.05592184  | -1.39023996 |
| O  | 0.59974071  | 0.86645210  | -0.31301833 |
| O  | -1.44079767 | -0.87754325 | -0.57566821 |
| O  | -3.80990758 | 0.01402494  | 0.27895993  |
| Si | -4.69048664 | 0.20050134  | -1.11796313 |
| O  | -3.84293869 | 1.19470190  | -2.14650983 |
| O  | 0.58812534  | -0.91875925 | -2.30658707 |
| O  | -2.23809322 | 4.66165679  | 3.81765610  |
| O  | 0.17378244  | 3.53939339  | -0.14884046 |
| O  | -4.90212787 | -1.24404370 | -1.86278252 |
| O  | -1.19180590 | 5.45228792  | -1.34245364 |
| O  | -2.57333632 | 3.02844876  | -3.58304856 |
| Si | -1.19835821 | 5.91844549  | 4.27709335  |
| Si | -4.05424360 | -2.20886314 | -2.95224869 |
| Si | -2.05017391 | 6.72725394  | -2.03425502 |
| Si | -1.56211104 | 3.65323422  | -4.77877883 |
| Si | -0.89018672 | 1.98120152  | 5.70389095  |
| Si | -2.77800657 | -3.29285334 | 2.54725755  |
| H  | -3.41099118 | -4.60003219 | 2.21649869  |
| H  | -1.35986356 | -3.49195067 | 2.96635734  |
| H  | -3.53843999 | -2.60248116 | 3.62911263  |

|    |             |             |             |
|----|-------------|-------------|-------------|
| H  | -2.18218605 | 2.50417253  | 6.23199148  |
| H  | -0.26801911 | 1.04524423  | 6.68148655  |
| H  | 0.03963594  | 3.11104140  | 5.40476947  |
| H  | -0.49941603 | 4.48553597  | -4.14313587 |
| H  | -0.95173941 | 2.53723468  | -5.55703420 |
| H  | -2.42267421 | 4.49585004  | -5.65653817 |
| H  | -2.66803710 | 7.57883339  | -0.98080757 |
| H  | -1.04686455 | 7.50849328  | -2.81337387 |
| H  | -3.08987575 | 6.18503080  | -2.95841730 |
| H  | -1.21038091 | 5.94194224  | 5.76644729  |
| H  | 0.17308737  | 5.63556316  | 3.76581520  |
| H  | -1.70696682 | 7.20742982  | 3.72579198  |
| H  | -3.56308779 | -3.41932202 | -2.23355902 |
| H  | -4.99140154 | -2.59927398 | -4.04443273 |
| H  | -2.89825127 | -1.44603554 | -3.51222079 |
| O  | -6.16253601 | 0.83798672  | -0.78210524 |
| H  | -6.09319222 | 1.71067820  | -0.35151861 |
| Si | 0.67244350  | -2.58568935 | -2.56914774 |
| H  | 1.72263751  | -2.79462147 | -3.60422397 |
| H  | 1.04447752  | -3.27515398 | -1.29920183 |
| H  | -0.64785748 | -3.08453372 | -3.05251279 |
| Si | 3.81605754  | 1.81122268  | 0.37385620  |
| H  | 4.89022330  | 2.69203986  | 0.91059032  |
| H  | 3.98792593  | 0.41545991  | 0.87157062  |
| H  | 3.82321264  | 1.82533911  | -1.11810200 |
| H  | -4.98048105 | 4.33124034  | 2.81269570  |
| O  | -4.34834931 | 4.49345952  | 2.10758080  |
| H  | -4.12076843 | 5.33875578  | -0.50074785 |
| H  | -5.62977459 | 3.09112786  | 0.17539610  |
| H  | -6.53786445 | 5.57452975  | 0.91381785  |
| Al | -5.46747049 | 4.69464334  | 0.08712428  |
| N  | -6.51022925 | 4.82950965  | -1.77118444 |
| C  | -5.76610243 | 4.06721620  | -2.78719458 |
| H  | -4.75110171 | 4.45780946  | -2.86775821 |
| H  | -5.71563965 | 3.01882527  | -2.49291101 |
| H  | -6.25703928 | 4.13982925  | -3.76563919 |
| C  | -7.86623812 | 4.27967008  | -1.62496736 |
| H  | -8.42610403 | 4.37452261  | -2.56360529 |
| H  | -7.80431395 | 3.22393265  | -1.35743383 |
| H  | -8.39437769 | 4.81530344  | -0.83443720 |
| C  | -6.57965302 | 6.24663037  | -2.15684394 |
| H  | -7.10956465 | 6.80913841  | -1.38622433 |
| H  | -5.56842437 | 6.64607495  | -2.25090264 |
| H  | -7.10182350 | 6.36535245  | -3.11445082 |

### **B<sup>I</sup> AlH<sub>3</sub> NMe<sub>3</sub> TS HH (N/O *trans*) TS**

E: -1837.63786184 ; H: -1837.095960 ; G: -1837.261776

|    |             |             |             |
|----|-------------|-------------|-------------|
| O  | -1.05970088 | 1.08861890  | 4.29502027  |
| Si | -1.30571651 | 1.31812745  | 2.69828596  |
| O  | 0.06931973  | 1.93445175  | 2.02095907  |
| Si | 0.82077596  | 2.13881001  | 0.56959253  |
| O  | 2.41505338  | 2.36883251  | 0.81971462  |
| O  | -1.64986156 | -0.14237502 | 2.01959068  |
| Si | -2.43535131 | -0.85155796 | 0.76069057  |
| O  | -2.82759228 | -2.38068338 | 1.17038284  |
| O  | -2.56579944 | 2.33625515  | 2.41055587  |
| Si | -2.86296799 | 3.95838255  | 2.27034834  |
| O  | -1.78866056 | 4.63128420  | 1.19137884  |
| Si | -1.28074287 | 4.19626123  | -0.31105460 |
| O  | -2.38716121 | 3.10830420  | -0.90544762 |
| Si | -2.52735506 | 2.11767848  | -2.22195142 |
| O  | -1.19603276 | 1.14209788  | -2.31901178 |
| Si | -0.38579167 | 0.02345611  | -1.41499955 |
| O  | 0.62069054  | 0.78270536  | -0.35845694 |
| O  | -1.46590847 | -0.91335975 | -0.58132399 |
| O  | -3.76571890 | 0.03793711  | 0.36094687  |

|    |             |             |             |
|----|-------------|-------------|-------------|
| Si | -4.66726650 | 0.18386873  | -1.02468937 |
| O  | -3.89916662 | 1.23973557  | -2.05002021 |
| O  | 0.47823175  | -0.93732475 | -2.40932944 |
| O  | -2.58877532 | 4.68651893  | 3.71563459  |
| O  | 0.18718663  | 3.44420346  | -0.21129724 |
| O  | -4.83894559 | -1.25485874 | -1.78308951 |
| O  | -1.07400622 | 5.47848635  | -1.29161435 |
| O  | -2.64734957 | 2.98711790  | -3.60068361 |
| Si | -1.68335842 | 6.01186671  | 4.23594429  |
| Si | -3.93872813 | -2.21068073 | -2.84262706 |
| Si | -1.85386576 | 6.75058684  | -2.06840507 |
| Si | -1.61940541 | 3.61676328  | -4.78124688 |
| Si | -0.99902407 | 2.03350036  | 5.69316813  |
| Si | -2.79694686 | -3.31806136 | 2.57488146  |
| H  | -3.47711257 | -4.60027300 | 2.24044463  |
| H  | -1.38140117 | -3.56644449 | 2.97480214  |
| H  | -3.52357839 | -2.61077750 | 3.66888626  |
| H  | -2.38588669 | 2.33729261  | 6.14562384  |
| H  | -0.27434844 | 1.23067575  | 6.71754276  |
| H  | -0.25920324 | 3.29983275  | 5.41211562  |
| H  | -0.55521115 | 4.43137740  | -4.12462092 |
| H  | -1.01156764 | 2.50362745  | -5.56503908 |
| H  | -2.46530220 | 4.47606199  | -5.65683797 |
| H  | -2.40016642 | 7.71531557  | -1.07498534 |
| H  | -0.81934320 | 7.40683538  | -2.91843637 |
| H  | -2.94522367 | 6.21328317  | -2.93636816 |
| H  | -1.91604962 | 6.13131829  | 5.70323046  |
| H  | -0.23594954 | 5.77584910  | 3.96017670  |
| H  | -2.14378765 | 7.24630706  | 3.53414861  |
| H  | -3.35236022 | -3.34847668 | -2.07934541 |
| H  | -4.86798235 | -2.70978857 | -3.89533411 |
| H  | -2.85112661 | -1.39041986 | -3.45542334 |
| O  | -6.17006187 | 0.74483204  | -0.65563218 |
| H  | -6.16114298 | 1.55015780  | -0.12636723 |
| Si | 0.63471751  | -2.60365854 | -2.64025136 |
| H  | 1.68408778  | -2.78663774 | -3.68063373 |
| H  | 1.04414068  | -3.25269595 | -1.36085086 |
| H  | -0.66693930 | -3.16532089 | -3.10514922 |
| Si | 3.85179734  | 1.74133822  | 0.19535042  |
| H  | 4.94914877  | 2.61064099  | 0.70332264  |
| H  | 4.03214067  | 0.33969573  | 0.67320782  |
| H  | 3.81061168  | 1.76907693  | -1.29609576 |
| H  | -5.00328317 | 3.35753629  | 1.02502607  |
| O  | -4.41347886 | 4.13378409  | 1.76423973  |
| H  | -4.05240443 | 5.67480488  | -0.48510770 |
| H  | -5.59699984 | 3.20786132  | 0.22336415  |
| H  | -6.48209095 | 5.84151053  | 1.00126067  |
| Al | -5.33979163 | 5.04889760  | 0.22102192  |
| N  | -6.41664638 | 4.91016300  | -1.60276369 |
| C  | -5.65504846 | 4.13358398  | -2.59672764 |
| H  | -4.66583918 | 4.57343211  | -2.72457412 |
| H  | -5.54535831 | 3.10573111  | -2.25226266 |
| H  | -6.17332329 | 4.12834524  | -3.56267770 |
| C  | -7.74381809 | 4.30455105  | -1.40244478 |
| H  | -8.32494985 | 4.33628563  | -2.33135470 |
| H  | -7.62859025 | 3.26309254  | -1.10031641 |
| H  | -8.27986842 | 4.84576311  | -0.62135797 |
| C  | -6.57014283 | 6.29966644  | -2.06967489 |
| H  | -7.12525152 | 6.87660176  | -1.32796373 |
| H  | -5.58478820 | 6.74929731  | -2.20518533 |
| H  | -7.10971588 | 6.32744668  | -3.02328235 |

**B<sup>I</sup>\_AlH<sub>3</sub>\_NMe<sub>3</sub>\_TS\_HH (N/O *trans*) product / H<sub>2</sub> adduct**

E: -1837.70130230 ; H: -1837.157830 ; G: -1837.327302 ;  
O -2.17776584 1.86635875 3.88656033  
Si -2.09127507 1.89949128 2.25803334

|    |             |             |             |
|----|-------------|-------------|-------------|
| O  | -0.50583365 | 2.04815109  | 1.81049425  |
| Si | 0.49133257  | 2.31362910  | 0.52944893  |
| O  | 2.03198422  | 2.42655277  | 1.05219152  |
| O  | -2.68915858 | 0.46824189  | 1.70106766  |
| Si | -3.08269563 | -0.35254450 | 0.33517795  |
| O  | -3.68406893 | -1.81073343 | 0.75994196  |
| O  | -2.98264229 | 3.10955524  | 1.58908717  |
| Si | -2.88064093 | 4.77601867  | 1.60187046  |
| O  | -2.14697101 | 5.20665016  | 0.15596080  |
| Si | -1.25081174 | 4.37847806  | -0.94305329 |
| O  | -2.15602882 | 3.14236789  | -1.56691317 |
| Si | -2.25935618 | 2.18250098  | -2.90817735 |
| O  | -1.15102178 | 0.96375224  | -2.74272279 |
| Si | -0.52708971 | 0.08650657  | -1.49167796 |
| O  | 0.39383370  | 1.04482762  | -0.52567672 |
| O  | -1.75486886 | -0.59679675 | -0.62008508 |
| O  | -4.19592288 | 0.50113623  | -0.53415101 |
| Si | -4.69205654 | 0.48258867  | -2.11768979 |
| O  | -3.78057263 | 1.55813991  | -2.97323963 |
| O  | 0.40148393  | -1.10375394 | -2.10942910 |
| O  | -1.85591883 | 5.17245223  | 2.83517269  |
| O  | 0.08442108  | 3.71908957  | -0.22909981 |
| O  | -4.58694528 | -1.03694605 | -2.72056277 |
| O  | -0.78002534 | 5.39073236  | -2.13901654 |
| O  | -1.99299387 | 3.00648910  | -4.28565802 |
| Si | -0.46305447 | 6.10920202  | 2.99303437  |
| Si | -3.51798751 | -2.17119179 | -3.36762419 |
| Si | -0.92499379 | 7.05320523  | -2.42819183 |
| Si | -0.71609143 | 3.75153584  | -5.10486288 |
| Si | -1.60045425 | 2.77141281  | 5.19009444  |
| Si | -3.73918981 | -2.73015722 | 2.17520622  |
| H  | -4.35395017 | -4.03549257 | 1.80372804  |
| H  | -2.35489092 | -2.93579120 | 2.69397396  |
| H  | -4.57178089 | -2.03144065 | 3.19572145  |
| H  | -2.60103190 | 3.81264694  | 5.55431452  |
| H  | -1.41433144 | 1.81382068  | 6.31756415  |
| H  | -0.29433516 | 3.39969297  | 4.83296067  |
| H  | 0.55926043  | 3.53333121  | -4.36413657 |
| H  | -0.64325755 | 3.13459508  | -6.46013950 |
| H  | -1.02149312 | 5.20556410  | -5.21735007 |
| H  | -0.48144185 | 7.81062597  | -1.22225984 |
| H  | -0.04165577 | 7.35010998  | -3.59009000 |
| H  | -2.34421295 | 7.37466082  | -2.75335027 |
| H  | -0.21445357 | 6.26907223  | 4.45356416  |
| H  | 0.68348091  | 5.40705417  | 2.34542915  |
| H  | -0.67252037 | 7.44144754  | 2.35176311  |
| H  | -3.27291725 | -3.22502776 | -2.34350932 |
| H  | -4.16798901 | -2.75664580 | -4.57440302 |
| H  | -2.24079900 | -1.49665414 | -3.73774050 |
| O  | -6.25170668 | 1.01631931  | -2.22056994 |
| H  | -6.92550427 | 0.34447974  | -2.10702051 |
| Si | 0.65801967  | -2.73699671 | -1.76905783 |
| H  | 1.87169982  | -3.14539985 | -2.52895204 |
| H  | 0.86974418  | -2.91968161 | -0.30287262 |
| H  | -0.52786707 | -3.52676699 | -2.21373245 |
| Si | 3.42233742  | 1.48162456  | 0.89853628  |
| H  | 4.48776909  | 2.16742055  | 1.68054406  |
| H  | 3.16501399  | 0.11846048  | 1.45050162  |
| H  | 3.80773365  | 1.38291558  | -0.53894311 |
| H  | -6.76555729 | 0.02892373  | 1.53070713  |
| O  | -4.33493226 | 5.42975621  | 1.73162225  |
| H  | -5.47608037 | 7.19661963  | -0.17094488 |
| H  | -6.24551803 | 0.20622936  | 1.02670951  |
| H  | -7.03040247 | 6.18655668  | 1.88617881  |
| Al | -5.77748335 | 6.04655716  | 0.90166345  |
| N  | -6.31621430 | 4.47173334  | -0.29293359 |
| C  | -5.28129170 | 4.23270389  | -1.32276338 |

|   |             |            |             |
|---|-------------|------------|-------------|
| H | -5.05026255 | 5.16816233 | -1.83521349 |
| H | -4.37930018 | 3.84804372 | -0.85059204 |
| H | -5.63836834 | 3.49676527 | -2.04801884 |
| C | -6.49674610 | 3.24360301 | 0.51349919  |
| H | -6.79405336 | 2.41524266 | -0.13526177 |
| H | -5.55635666 | 2.99240705 | 1.00457819  |
| H | -7.26348575 | 3.41468364 | 1.27108584  |
| C | -7.58743139 | 4.83448341 | -0.95044850 |
| H | -8.35207936 | 5.01897774 | -0.19406440 |
| H | -7.44505239 | 5.74116775 | -1.54158530 |
| H | -7.91678025 | 4.02501115 | -1.61013295 |

### **B<sup>I</sup>\_AlH<sub>3</sub>\_NMe<sub>3</sub>\_TS\_HH (N/O *cis*) adduct**

E: -1837.66724765 ; H: -1837.120748 ; G: -1837.285424

|    |             |             |             |
|----|-------------|-------------|-------------|
| O  | -0.92885791 | 1.25855541  | 3.65049392  |
| Si | -1.03435014 | 0.99842864  | 2.04307469  |
| O  | 0.42282014  | 1.32235977  | 1.33274082  |
| Si | 1.11013157  | 1.87691392  | -0.06518520 |
| O  | 2.56114184  | 2.53077671  | 0.29282849  |
| O  | -1.43246874 | -0.58251322 | 1.81665284  |
| Si | -1.50391584 | -1.62194032 | 0.54392815  |
| O  | -1.67596763 | -3.12947555 | 1.14611652  |
| O  | -2.20938926 | 1.91430353  | 1.34060832  |
| Si | -2.59338572 | 3.50894427  | 1.08858135  |
| O  | -2.39819102 | 3.78373030  | -0.54205742 |
| Si | -1.28386928 | 3.10674130  | -1.55672060 |
| O  | -1.72643694 | 1.57090659  | -1.93740430 |
| Si | -1.70424506 | 0.41598638  | -3.11669906 |
| O  | -0.39028601 | -0.56059567 | -2.84226615 |
| Si | 0.66802306  | -0.80912108 | -1.59805945 |
| O  | 1.30526783  | 0.63614347  | -1.12926683 |
| O  | -0.10846224 | -1.53233880 | -0.33509476 |
| O  | -2.78954651 | -1.18670347 | -0.39670082 |
| Si | -3.44168608 | -1.66564277 | -1.85000546 |
| O  | -3.05794325 | -0.50925704 | -2.97820277 |
| O  | 1.87212567  | -1.77333958 | -2.11865685 |
| O  | -1.56554227 | 4.43638751  | 1.97064961  |
| O  | 0.15912380  | 3.04433929  | -0.74322886 |
| O  | -2.78067604 | -3.11796808 | -2.24024625 |
| O  | -1.14123501 | 4.00773042  | -2.91138300 |
| O  | -1.64507997 | 1.05830624  | -4.61200333 |
| Si | -0.26357004 | 5.47827534  | 1.71338709  |
| Si | -1.76001706 | -3.77082322 | -3.41387806 |
| Si | -1.45120088 | 5.60637732  | -3.37069192 |
| Si | -0.51466780 | 1.90561940  | -5.54283937 |
| Si | -0.55053050 | 2.50907450  | 4.71772076  |
| Si | -1.78679049 | -4.72495182 | 0.61209644  |
| H  | -0.87665685 | -4.93289040 | -0.55344955 |
| H  | -1.35907306 | -5.58365233 | 1.75285009  |
| H  | -3.19614079 | -5.02503417 | 0.23385547  |
| H  | -1.77909744 | 3.30494654  | 4.99725107  |
| H  | -0.04857868 | 1.86823497  | 5.96599299  |
| H  | 0.50999400  | 3.37616990  | 4.12313768  |
| H  | 0.70278698  | 2.18064327  | -4.72569931 |
| H  | -0.16743799 | 1.05083489  | -6.71384591 |
| H  | -1.14537026 | 3.17565809  | -5.99750204 |
| H  | -0.91792165 | 6.53216182  | -2.32890146 |
| H  | -0.74719459 | 5.81209045  | -4.66685796 |
| H  | -2.92069822 | 5.79621502  | -3.53167651 |
| H  | -0.29790910 | 6.49500079  | 2.80213609  |
| H  | 1.00197519  | 4.69266530  | 1.78313737  |
| H  | -0.39561922 | 6.12920480  | 0.37703037  |
| H  | -2.13841814 | -5.20327469 | -3.57112617 |
| H  | -1.91796081 | -3.02873723 | -4.69684095 |
| H  | -0.35189673 | -3.66945416 | -2.92875861 |
| Si | 2.49640475  | -3.31871524 | -1.87463256 |



|    |             |             |             |
|----|-------------|-------------|-------------|
| H  | 3.88328951  | -3.17913177 | -1.34488393 |
| H  | 1.64078333  | -4.06006784 | -0.90268339 |
| H  | 2.51346364  | -4.02133240 | -3.18922570 |
| Si | 3.57550052  | 2.53817198  | 1.64216422  |
| H  | 2.88842451  | 3.21960546  | 2.77881317  |
| H  | 3.91708157  | 1.13590356  | 2.02212915  |
| H  | 4.79994639  | 3.28827407  | 1.24722503  |
| H  | -5.53731583 | -1.00410632 | -1.55486227 |
| O  | -5.06823891 | -1.83574827 | -1.73349783 |
| H  | -4.84798499 | 3.39486974  | 1.10985750  |
| O  | -4.12095244 | 3.83820922  | 1.57499701  |
| H  | -8.36999159 | 1.03774377  | 0.12409982  |
| H  | -6.19441814 | 2.63512303  | 0.53840640  |
| H  | -5.96475632 | 0.47729626  | -1.04256604 |
| Al | -6.77592364 | 1.17976101  | 0.15683925  |
| N  | -6.24049439 | 0.05878853  | 1.78417273  |
| C  | -6.52125893 | -1.36720374 | 1.51287397  |
| H  | -6.27657708 | -1.97283194 | 2.39223470  |
| H  | -7.57837252 | -1.49541612 | 1.27321800  |
| H  | -5.91786517 | -1.70535144 | 0.66995086  |
| C  | -7.01842251 | 0.50939833  | 2.95659862  |
| H  | -8.08248859 | 0.36331345  | 2.76749758  |
| H  | -6.72633210 | -0.05909900 | 3.84627120  |
| H  | -6.82893412 | 1.56952364  | 3.13395352  |
| C  | -4.79520717 | 0.23818242  | 2.04454357  |
| H  | -4.47637951 | -0.40317597 | 2.87301841  |
| H  | -4.22520996 | -0.01985682 | 1.15226116  |
| H  | -4.60066915 | 1.27793384  | 2.30231266  |

### **B<sup>I</sup>\_AlH<sub>3</sub>\_NMe<sub>3</sub>\_TS\_HH (N/O cis)**

E: -1837.63768419 ; H: -1837.096402 ; G: -1837.259769

|    |             |             |             |
|----|-------------|-------------|-------------|
| O  | -0.65471405 | 1.22634178  | 3.74930164  |
| Si | -0.73762392 | 0.95330696  | 2.14345156  |
| O  | 0.65658044  | 1.47697579  | 1.42405884  |
| Si | 1.30683726  | 2.06226092  | 0.02375230  |
| O  | 2.68272360  | 2.86183103  | 0.37837757  |
| O  | -0.89804791 | -0.67172865 | 1.91393670  |
| Si | -0.99744486 | -1.63932509 | 0.58426252  |
| O  | -1.10367836 | -3.20176931 | 1.04836904  |
| O  | -2.03638754 | 1.68873120  | 1.44337346  |
| Si | -2.53474833 | 3.25350281  | 1.19014526  |
| O  | -2.37107011 | 3.55233726  | -0.43996136 |
| Si | -1.19653599 | 3.04590480  | -1.48068946 |
| O  | -1.47425861 | 1.48027899  | -1.90662796 |
| Si | -1.30784711 | 0.34530386  | -3.09508083 |
| O  | 0.12180949  | -0.44421430 | -2.84468267 |
| Si | 1.13085249  | -0.64517747 | -1.54805377 |
| O  | 1.63740071  | 0.82264383  | -1.00921691 |
| O  | 0.33972949  | -1.46131244 | -0.35153089 |
| O  | -2.34652873 | -1.18707643 | -0.24638229 |
| Si | -3.34488148 | -1.23776280 | -1.55096840 |
| O  | -2.55770846 | -0.72106539 | -2.90806106 |
| O  | 2.43445456  | -1.50201733 | -2.01435554 |
| O  | -1.54897882 | 4.23513255  | 2.06488476  |
| O  | 0.25769745  | 3.11750428  | -0.69219125 |
| O  | -3.88029822 | -2.76923959 | -1.77432420 |
| O  | -1.17184836 | 3.99134289  | -2.81040567 |
| O  | -1.37187817 | 0.96359680  | -4.59672051 |
| Si | -0.43565487 | 5.47311149  | 1.78973590  |
| Si | -3.45037998 | -4.08409854 | -2.74841165 |
| Si | -1.82685909 | 5.47674353  | -3.29161714 |
| Si | -0.51911148 | 2.05734748  | -5.56512214 |
| Si | -0.34354542 | 2.51407657  | 4.79566457  |
| Si | -2.35165568 | -4.25200637 | 1.47990548  |
| H  | -2.74493068 | -5.04791596 | 0.28067649  |
| H  | -1.83473566 | -5.14387630 | 2.55320517  |

|    |             |             |             |
|----|-------------|-------------|-------------|
| H  | -3.52293830 | -3.46233679 | 1.96657248  |
| H  | -1.61527241 | 3.23329570  | 5.08655034  |
| H  | 0.21759733  | 1.92136953  | 6.04289908  |
| H  | 0.65047551  | 3.43932663  | 4.17405755  |
| H  | 0.71216508  | 2.50628950  | -4.85384167 |
| H  | -0.16312668 | 1.34487001  | -6.82491186 |
| H  | -1.41224009 | 3.21315132  | -5.85800049 |
| H  | -1.60737372 | 6.48305686  | -2.21231805 |
| H  | -1.10060478 | 5.86764393  | -4.53171616 |
| H  | -3.28218368 | 5.30805493  | -3.56323781 |
| H  | -0.65112090 | 6.50452224  | 2.84405813  |
| H  | 0.93913086  | 4.90556115  | 1.90113926  |
| H  | -0.65052914 | 6.05264217  | 0.43136788  |
| H  | -4.22291112 | -5.25282184 | -2.24359834 |
| H  | -3.80178568 | -3.78607310 | -4.16533580 |
| H  | -1.98339455 | -4.33180762 | -2.61779464 |
| Si | 2.80802952  | -3.07418283 | -2.50020545 |
| H  | 4.25226626  | -3.28662626 | -2.20661946 |
| H  | 1.96689166  | -4.04457883 | -1.73959332 |
| H  | 2.54715815  | -3.20696224 | -3.96284235 |
| Si | 3.71847568  | 2.95597836  | 1.70881985  |
| H  | 3.00990450  | 3.62013824  | 2.84256078  |
| H  | 4.14714502  | 1.58439850  | 2.11041737  |
| H  | 4.88854673  | 3.76913221  | 1.27666756  |
| H  | -4.93475305 | 0.57008183  | -1.90442970 |
| O  | -4.62249915 | -0.23074921 | -1.23562294 |
| H  | -4.76082321 | 3.00835588  | 1.16612623  |
| O  | -4.07943083 | 3.48362170  | 1.67382679  |
| H  | -7.64862597 | 0.25915282  | -0.72180974 |
| H  | -5.86632265 | 2.12829080  | 0.45431364  |
| H  | -5.72367770 | 1.47216389  | -2.00407649 |
| Al | -6.17566177 | 0.80402723  | -0.41343175 |
| N  | -5.98343191 | -0.41388776 | 1.34385635  |
| C  | -6.15829410 | -1.84115393 | 1.02652158  |
| H  | -6.18151079 | -2.43882333 | 1.94587246  |
| H  | -7.09609036 | -1.97988740 | 0.48616890  |
| H  | -5.33953886 | -2.19089077 | 0.39880247  |
| C  | -7.07896832 | 0.02141709  | 2.22909628  |
| H  | -8.03773575 | -0.13811596 | 1.73361240  |
| H  | -7.05946559 | -0.54298851 | 3.16863300  |
| H  | -6.96713566 | 1.08404383  | 2.45058450  |
| C  | -4.69496961 | -0.19692221 | 2.02664386  |
| H  | -4.64100893 | -0.79111195 | 2.94712935  |
| H  | -3.87439204 | -0.47453512 | 1.36909219  |
| H  | -4.59199061 | 0.85725146  | 2.28190820  |

**B<sup>I</sup>\_AlH<sub>3</sub>\_NMe<sub>3</sub>\_TS\_HH (N/O *cis*) product / H<sub>2</sub> adduct**

E: -1837.70576701 ; H: -1837.162241 ; G: -1837.329608

|    |             |             |             |
|----|-------------|-------------|-------------|
| O  | -0.57651168 | 1.22163947  | 3.77108420  |
| Si | -0.71706189 | 0.91392069  | 2.17269392  |
| O  | 0.66384259  | 1.40018478  | 1.40762406  |
| Si | 1.38834762  | 1.87287589  | -0.00023301 |
| O  | 2.83865300  | 2.52765200  | 0.35940620  |
| O  | -0.94444087 | -0.70342134 | 1.97967001  |
| Si | -1.10684949 | -1.68923074 | 0.66298867  |
| O  | -1.32619763 | -3.22711648 | 1.17126665  |
| O  | -2.01254510 | 1.69474262  | 1.51443060  |
| Si | -2.54910058 | 3.23984129  | 1.26408211  |
| O  | -2.09910783 | 3.70331326  | -0.26941615 |
| Si | -1.06370778 | 3.06948042  | -1.38754844 |
| O  | -1.53451994 | 1.53446679  | -1.74472519 |
| Si | -1.51837765 | 0.37187427  | -2.91932607 |
| O  | -0.16879555 | -0.56156472 | -2.68872505 |
| Si | 0.95959080  | -0.83426163 | -1.51324363 |
| O  | 1.60798851  | 0.59122084  | -1.00562327 |
| O  | 0.26946808  | -1.62410673 | -0.23934990 |

|    |             |             |             |
|----|-------------|-------------|-------------|
| O  | -2.39049700 | -1.14316339 | -0.20179286 |
| Si | -3.42077003 | -1.45631517 | -1.47179233 |
| O  | -2.85961718 | -0.56266876 | -2.76503345 |
| O  | 2.16259629  | -1.74264918 | -2.13232602 |
| O  | -1.85294040 | 4.23692098  | 2.36817224  |
| O  | 0.45984412  | 3.01270175  | -0.75379053 |
| O  | -3.29163998 | -3.05946441 | -1.84741194 |
| O  | -1.06659952 | 4.01532579  | -2.72042217 |
| O  | -1.50310582 | 1.02184253  | -4.41624654 |
| Si | -0.89158257 | 5.62413592  | 2.28741542  |
| Si | -2.29340702 | -3.96488821 | -2.85769840 |
| Si | -1.95377028 | 5.34597482  | -3.27139067 |
| Si | -0.39363042 | 1.87923639  | -5.35974677 |
| Si | 0.02825794  | 2.47134665  | 4.72952325  |
| Si | -2.60811367 | -4.30330702 | 1.36345304  |
| H  | -2.55245538 | -5.32522783 | 0.28049813  |
| H  | -2.45598421 | -4.94850749 | 2.69845120  |
| H  | -3.90124423 | -3.55578154 | 1.30203348  |
| H  | -1.11029029 | 3.18940742  | 5.36701063  |
| H  | 0.90394732  | 1.85592618  | 5.76690273  |
| H  | 0.82600775  | 3.41050904  | 3.88285918  |
| H  | 0.82497343  | 2.18057454  | -4.55300424 |
| H  | -0.03958292 | 1.02879594  | -6.53225158 |
| H  | -1.04966363 | 3.13794958  | -5.81265979 |
| H  | -1.82747216 | 6.46531623  | -2.29359695 |
| H  | -1.36293229 | 5.72602345  | -4.58435107 |
| H  | -3.38467599 | 4.95818551  | -3.43227311 |
| H  | -0.63397332 | 6.03911236  | 3.69486461  |
| H  | 0.39103190  | 5.29616546  | 1.59824694  |
| H  | -1.61455633 | 6.69751456  | 1.54517656  |
| H  | -2.59793555 | -5.39922047 | -2.59215144 |
| H  | -2.56025831 | -3.62538932 | -4.28540805 |
| H  | -0.86313489 | -3.67929106 | -2.52675582 |
| Si | 2.36125651  | -3.09530595 | -3.11711648 |
| H  | 3.80304465  | -3.14739178 | -3.48800332 |
| H  | 1.97443031  | -4.32201878 | -2.36086524 |
| H  | 1.51127501  | -2.95880263 | -4.33632727 |
| Si | 3.58937108  | 3.12798486  | 1.74585519  |
| H  | 2.87484602  | 4.35660143  | 2.20597156  |
| H  | 3.56059972  | 2.09647862  | 2.82351481  |
| H  | 4.99188348  | 3.45347641  | 1.36559972  |
| H  | -5.02069396 | 0.90058564  | -3.28614570 |
| O  | -4.92862820 | -1.06575263 | -1.07365156 |
| H  | -4.65468447 | 2.76428520  | 0.77763807  |
| O  | -4.18210438 | 3.30627784  | 1.43063509  |
| H  | -7.42969105 | 0.24890108  | -0.90047425 |
| H  | -5.14970214 | 1.65701533  | -0.29995472 |
| H  | -5.56614106 | 1.41019431  | -3.29085047 |
| Al | -5.91253640 | 0.25002476  | -0.41411733 |
| N  | -6.04997810 | -0.31454835 | 1.54790848  |
| C  | -6.66912673 | -1.65501246 | 1.60871972  |
| H  | -6.74692839 | -1.99022100 | 2.64868136  |
| H  | -7.66550606 | -1.61724376 | 1.16566804  |
| H  | -6.05614882 | -2.35807125 | 1.04359474  |
| C  | -6.89401196 | 0.66526655  | 2.26127967  |
| H  | -7.86770559 | 0.73601252  | 1.77351016  |
| H  | -7.03379695 | 0.35920942  | 3.30337888  |
| H  | -6.41093008 | 1.64345034  | 2.24405632  |
| C  | -4.70508280 | -0.35573369 | 2.16247284  |
| H  | -4.77867314 | -0.64933162 | 3.21510914  |
| H  | -4.08561487 | -1.07131196 | 1.62530206  |
| H  | -4.23909057 | 0.62638164  | 2.09222308  |

**B<sup>I</sup>\_AlH<sub>2</sub>NMe<sub>3</sub>**

E: -1836.52823446 ; H: -1836.001069 ; G: -1836.163084

|    |             |             |             |
|----|-------------|-------------|-------------|
| O  | -1.62896474 | 0.37228164  | 4.05340975  |
| Si | -1.54836666 | 0.63359100  | 2.44856993  |
| O  | -0.53453949 | 1.89686355  | 2.13980063  |
| Si | 0.31407929  | 2.62108828  | 0.92315976  |
| O  | 1.52436513  | 3.50569918  | 1.56116597  |
| O  | -0.99808393 | -0.73530190 | 1.72732790  |
| Si | -0.86227704 | -1.71125757 | 0.40137114  |
| O  | -0.13125766 | -3.10024432 | 0.83651412  |
| O  | -3.03756789 | 0.97248910  | 1.79505127  |
| Si | -4.04728113 | 2.33088667  | 1.74930816  |
| O  | -3.19153671 | 3.59932684  | 1.07887783  |
| Si | -2.30113847 | 3.64859056  | -0.30120513 |
| O  | -2.70866883 | 2.29606939  | -1.16709658 |
| Si | -2.18345013 | 1.28297402  | -2.35147333 |
| O  | -0.52963229 | 1.18676526  | -2.29458824 |
| Si | 0.60583373  | 0.47133843  | -1.33248395 |
| O  | 0.95895713  | 1.46486924  | -0.06565010 |
| O  | 0.03653203  | -0.96946828 | -0.76167310 |
| O  | -2.36488804 | -2.04538010 | -0.19520426 |
| Si | -3.53013319 | -1.27118275 | -1.06853832 |
| O  | -2.78978963 | -0.21521738 | -2.09188621 |
| O  | 1.95953679  | 0.20711906  | -2.20090849 |
| O  | -4.32636167 | 2.75572978  | 3.31434329  |
| O  | -0.68984611 | 3.60521170  | 0.05828890  |
| O  | -4.42477491 | -2.32318291 | -1.92498218 |
| O  | -2.63185411 | 5.01248019  | -1.13483471 |
| O  | -2.62541322 | 1.86617078  | -3.81116564 |
| Si | -4.50955541 | 4.20206216  | 4.16031177  |
| Si | -5.64983990 | -2.22949505 | -3.08917199 |
| Si | -2.61021160 | 5.51320763  | -2.74650453 |
| Si | -2.00621249 | 1.81279386  | -5.38166411 |
| Si | -2.13448050 | 1.14679305  | 5.46686938  |
| Si | 0.08741967  | -3.96473950 | 2.27198694  |
| H  | 0.47179587  | -5.34900719 | 1.87966643  |
| H  | 1.17597411  | -3.32636579 | 3.06692997  |
| H  | -1.18349502 | -3.97205074 | 3.05319284  |
| H  | -3.56432178 | 0.81800958  | 5.72150534  |
| H  | -1.27163665 | 0.62739862  | 6.56476892  |
| H  | -1.95375166 | 2.62224539  | 5.32641077  |
| H  | -0.99040772 | 2.89404026  | -5.53862945 |
| H  | -1.38477440 | 0.47978397  | -5.63381499 |
| H  | -3.15394423 | 2.04031313  | -6.30319451 |
| H  | -2.34692463 | 6.97862945  | -2.74634688 |
| H  | -1.53754536 | 4.78261021  | -3.48415347 |
| H  | -3.94011048 | 5.22185792  | -3.35726071 |
| H  | -4.86278034 | 3.83288605  | 5.56070985  |
| H  | -3.23354459 | 4.97403537  | 4.13408887  |
| H  | -5.60676041 | 5.00846442  | 3.54603363  |
| H  | -5.91419720 | -3.63224414 | -3.51707290 |
| H  | -6.86927812 | -1.62245322 | -2.48517962 |
| H  | -5.17644249 | -1.41257909 | -4.24460938 |
| O  | -4.52674178 | -0.51082788 | 0.04709252  |
| H  | -4.05009251 | -0.19353590 | 0.83444685  |
| Si | 2.82633006  | -1.14178031 | -2.73217315 |
| H  | 3.97110223  | -0.61721546 | -3.52792606 |
| H  | 3.31690543  | -1.91697656 | -1.55617581 |
| H  | 1.94900473  | -1.99875390 | -3.58177222 |
| Si | 3.21022642  | 3.52384523  | 1.46928353  |
| H  | 3.66957375  | 4.60111151  | 2.38935067  |
| H  | 3.74978809  | 2.20156077  | 1.90027364  |
| H  | 3.63142706  | 3.81748752  | 0.06860091  |
| O  | -5.34348491 | 1.94323794  | 0.89897581  |
| N  | -7.13255572 | 2.74671652  | -1.10364180 |
| C  | -6.17269975 | 3.79525104  | -1.48624910 |
| H  | -5.58836766 | 4.08378933  | -0.61253207 |
| H  | -5.49947758 | 3.40498976  | -2.25128033 |
| H  | -6.69336259 | 4.67774513  | -1.87880933 |

|    |             |            |             |
|----|-------------|------------|-------------|
| C  | -7.94439728 | 2.36244946 | -2.26725579 |
| H  | -8.52105360 | 3.21766459 | -2.64082591 |
| H  | -7.28939060 | 1.99660399 | -3.05962464 |
| H  | -8.63206818 | 1.56392066 | -1.98239870 |
| C  | -8.00188561 | 3.22423561 | -0.01803292 |
| H  | -8.69196882 | 2.42912586 | 0.26884274  |
| H  | -7.38876070 | 3.48225186 | 0.84490021  |
| H  | -8.57671395 | 4.10363121 | -0.33529311 |
| H  | -7.30319315 | 0.11636815 | -0.11124046 |
| H  | -5.36966973 | 0.91534771 | -1.95844982 |
| Al | -6.03594256 | 1.02187031 | -0.49126326 |

### **B<sup>I</sup>\_AlH<sub>2</sub>NMe<sub>3</sub>\_TS\_HH TS**

E: -1836.49781053 ; H: -1835.974998 ; G: -1836.142087

|    |             |             |             |
|----|-------------|-------------|-------------|
| O  | -1.66156764 | 0.54379684  | 3.98489644  |
| Si | -1.52908578 | 0.73908564  | 2.36942640  |
| O  | -0.35806948 | 1.86935717  | 2.06365560  |
| Si | 0.53049579  | 2.46200466  | 0.81030043  |
| O  | 1.84971912  | 3.22046695  | 1.39736482  |
| O  | -1.07920305 | -0.70378055 | 1.71604084  |
| Si | -1.23533878 | -1.62303588 | 0.35503705  |
| O  | -0.88205551 | -3.17214855 | 0.73557794  |
| O  | -2.94007749 | 1.20866548  | 1.66708255  |
| Si | -3.84851117 | 2.59635637  | 1.56697316  |
| O  | -2.92207128 | 3.77960067  | 0.82282127  |
| Si | -1.95775461 | 3.65848328  | -0.50389935 |
| O  | -2.42586657 | 2.26370186  | -1.27368653 |
| Si | -1.98682957 | 1.33783434  | -2.56625959 |
| O  | -0.36946733 | 0.99286910  | -2.46910805 |
| Si | 0.61257766  | 0.20874143  | -1.39614927 |
| O  | 1.02399624  | 1.22302547  | -0.16704885 |
| O  | -0.16974216 | -1.11500078 | -0.79858395 |
| O  | -2.76072585 | -1.52868301 | -0.23619073 |
| Si | -3.74816739 | -0.94867753 | -1.42544172 |
| O  | -2.86160045 | -0.04825178 | -2.50093870 |
| O  | 1.96581581  | -0.27504096 | -2.16870291 |
| O  | -4.10562233 | 3.12569502  | 3.11004653  |
| O  | -0.37322620 | 3.53319980  | -0.06489326 |
| O  | -4.39998465 | -2.21647737 | -2.23904833 |
| O  | -2.10288506 | 4.96017149  | -1.47979877 |
| O  | -2.24486660 | 2.14371897  | -3.96415492 |
| Si | -4.20834654 | 4.62275411  | 3.86823173  |
| Si | -3.79602820 | -3.50474949 | -3.14210124 |
| Si | -3.11668003 | 5.43988012  | -2.74099751 |
| Si | -1.33299955 | 2.48032525  | -5.34651482 |
| Si | -2.09127480 | 1.44379796  | 5.34426240  |
| Si | -0.59337851 | -4.03651363 | 2.15433600  |
| H  | -0.54903502 | -5.47512489 | 1.76911451  |
| H  | 0.71380800  | -3.61804071 | 2.74026679  |
| H  | -1.69297699 | -3.79332779 | 3.13290761  |
| H  | -3.54138939 | 1.25047888  | 5.62751040  |
| H  | -1.26947584 | 0.92943901  | 6.47652099  |
| H  | -1.79547938 | 2.88966292  | 5.11642263  |
| H  | -0.22053902 | 3.40971891  | -4.99566753 |
| H  | -0.78774868 | 1.21041941  | -5.90822727 |
| H  | -2.26285112 | 3.12374336  | -6.31658296 |
| H  | -3.48568043 | 6.86347003  | -2.49544716 |
| H  | -2.36892397 | 5.32143933  | -4.02642413 |
| H  | -4.33447281 | 4.57864868  | -2.76357676 |
| H  | -4.58196590 | 4.35900208  | 5.28758128  |
| H  | -2.89877633 | 5.33377865  | 3.80302671  |
| H  | -5.26652304 | 5.45069811  | 3.21087152  |
| H  | -4.77934216 | -4.61947932 | -3.03365522 |
| H  | -3.65108000 | -3.08376317 | -4.56640923 |
| H  | -2.46963316 | -3.92661242 | -2.60060381 |
| O  | -4.94813773 | -0.04914192 | -0.76540627 |
| H  | -6.12688135 | -0.16840507 | -0.65493985 |

|    |             |             |             |
|----|-------------|-------------|-------------|
| Si | 2.72897088  | -1.75748313 | -2.43504351 |
| H  | 4.00456888  | -1.45241666 | -3.14077540 |
| H  | 3.00069579  | -2.42712730 | -1.12951325 |
| H  | 1.85925127  | -2.62468140 | -3.28233039 |
| Si | 3.48926387  | 3.26023820  | 0.99674822  |
| H  | 4.08995488  | 4.37506929  | 1.78096090  |
| H  | 4.12519385  | 1.96227200  | 1.36541411  |
| H  | 3.64520413  | 3.50712474  | -0.46656705 |
| O  | -5.22270914 | 2.35328894  | 0.76653836  |
| N  | -7.62534633 | 2.88370789  | -0.54881992 |
| C  | -7.20729226 | 4.29279719  | -0.66595612 |
| H  | -6.50380160 | 4.52701668  | 0.13297053  |
| H  | -6.71468882 | 4.44534457  | -1.62781862 |
| H  | -8.07470122 | 4.95969327  | -0.59690474 |
| C  | -8.55248985 | 2.55042697  | -1.64232424 |
| H  | -9.43831025 | 3.19543069  | -1.60967266 |
| H  | -8.04755712 | 2.68375729  | -2.60076731 |
| H  | -8.86610037 | 1.50938803  | -1.55038463 |
| C  | -8.27671927 | 2.66139432  | 0.75395088  |
| H  | -8.55654218 | 1.61049084  | 0.84511553  |
| H  | -7.57502608 | 2.90797570  | 1.55003341  |
| H  | -9.17564516 | 3.28220180  | 0.84604462  |
| H  | -7.04276655 | 0.32749071  | -0.55107816 |
| H  | -5.52753742 | 2.25138344  | -2.18917281 |
| Al | -5.88399175 | 1.70209814  | -0.73852926 |

### **B<sup>I</sup>\_AlH<sub>2</sub>NMe<sub>3</sub>\_TS\_HH product / H<sub>2</sub> adduct**

E: -1836.56484897 ; H: -1836.039885 ; G: -1836.208143

|    |             |             |             |
|----|-------------|-------------|-------------|
| O  | -1.53798697 | 0.92988518  | 3.95402012  |
| Si | -1.51752415 | 1.14216264  | 2.33322042  |
| O  | -0.24708980 | 2.12526916  | 1.94747227  |
| Si | 0.70623504  | 2.56170551  | 0.67673102  |
| O  | 2.10329849  | 3.19397493  | 1.23112293  |
| O  | -1.30446824 | -0.32783756 | 1.62144397  |
| Si | -1.63590139 | -1.17795504 | 0.24642468  |
| O  | -1.61818371 | -2.77257580 | 0.61214595  |
| O  | -2.92141309 | 1.80001975  | 1.79565268  |
| Si | -3.65087169 | 3.26228359  | 1.49400054  |
| O  | -2.56587036 | 4.23884620  | 0.67621249  |
| Si | -1.64186556 | 3.99221895  | -0.66146334 |
| O  | -2.27839245 | 2.64770348  | -1.41385761 |
| Si | -1.87147891 | 1.72448444  | -2.73309935 |
| O  | -0.30495349 | 1.20772527  | -2.57206070 |
| Si | 0.52007721  | 0.28420738  | -1.47876372 |
| O  | 1.05583925  | 1.23350348  | -0.24377696 |
| O  | -0.46811434 | -0.89770633 | -0.88611310 |
| O  | -3.09805579 | -0.74191462 | -0.34566148 |
| Si | -3.95610765 | -0.25627967 | -1.68400307 |
| O  | -2.89592659 | 0.44861177  | -2.76363137 |
| O  | 1.79598801  | -0.41502676 | -2.21683124 |
| O  | -3.93990533 | 4.01043838  | 2.93356131  |
| O  | -0.07738930 | 3.68967255  | -0.23784210 |
| O  | -4.56808316 | -1.59741650 | -2.41859325 |
| O  | -1.63552116 | 5.28881610  | -1.64972477 |
| O  | -1.97165659 | 2.61980545  | -4.09622395 |
| Si | -3.27072146 | 5.34334747  | 3.71640378  |
| Si | -4.09951305 | -3.21011598 | -2.52368761 |
| Si | -2.62023435 | 5.97103995  | -2.84014614 |
| Si | -0.95475298 | 2.97592627  | -5.39955081 |
| Si | -2.49963799 | 1.38781909  | 5.25893682  |
| Si | -1.58561921 | -3.67058368 | 2.03916098  |
| H  | -1.76981739 | -5.09576074 | 1.64542529  |
| H  | -0.27196478 | -3.48645568 | 2.72241746  |
| H  | -2.69359942 | -3.23344221 | 2.93895475  |
| H  | -3.93084432 | 1.08225976  | 4.97040351  |
| H  | -2.02501459 | 0.60237654  | 6.43278297  |

|    |             |             |             |
|----|-------------|-------------|-------------|
| H  | -2.33213041 | 2.84873927  | 5.51786883  |
| H  | 0.22669944  | 3.74481587  | -4.91260917 |
| H  | -0.51528296 | 1.70807804  | -6.05120265 |
| H  | -1.75952428 | 3.79878153  | -6.34484239 |
| H  | -2.79626295 | 7.41148832  | -2.49849009 |
| H  | -1.92260023 | 5.84135060  | -4.15267458 |
| H  | -3.93471588 | 5.26927077  | -2.87312921 |
| H  | -3.88135491 | 5.38595093  | 5.07663346  |
| H  | -1.78994994 | 5.18818387  | 3.82313743  |
| H  | -3.60031513 | 6.59358802  | 2.96992400  |
| H  | -4.54891128 | -3.94451266 | -1.30385650 |
| H  | -4.76061097 | -3.77871433 | -3.73307252 |
| H  | -2.61446475 | -3.30487529 | -2.65081480 |
| O  | -5.14332497 | 0.74746718  | -1.26325552 |
| H  | -6.92410109 | -1.69401921 | -1.37358903 |
| Si | 2.35893137  | -1.99970124 | -2.37523112 |
| H  | 3.63805352  | -1.91738965 | -3.13347412 |
| H  | 2.59126134  | -2.58875136 | -1.02347105 |
| H  | 1.35843865  | -2.81577656 | -3.12196568 |
| Si | 3.73010594  | 2.74751036  | 1.18672944  |
| H  | 4.46079161  | 3.72913558  | 2.03640723  |
| H  | 3.88910119  | 1.36697162  | 1.73052500  |
| H  | 4.22752500  | 2.80252039  | -0.21842211 |
| O  | -5.00583614 | 3.02455831  | 0.65480233  |
| N  | -7.51805027 | 2.13192099  | -0.43262674 |
| C  | -8.10996314 | 3.42146674  | -0.02213908 |
| H  | -7.57986236 | 3.79669809  | 0.85342840  |
| H  | -8.01177892 | 4.14430284  | -0.83428073 |
| H  | -9.17092110 | 3.29169962  | 0.21685973  |
| C  | -8.21356134 | 1.61149210  | -1.62801043 |
| H  | -9.27234751 | 1.43977804  | -1.40683769 |
| H  | -8.12950015 | 2.33504644  | -2.44090891 |
| H  | -7.74779914 | 0.67466815  | -1.93393605 |
| C  | -7.61915493 | 1.15588091  | 0.67381952  |
| H  | -7.15275216 | 0.21974038  | 0.36868486  |
| H  | -7.09515086 | 1.54753994  | 1.54562155  |
| H  | -8.67073603 | 0.97914162  | 0.92413564  |
| H  | -7.55188991 | -1.99062252 | -1.09991907 |
| H  | -5.57195579 | 3.43790274  | -2.10701107 |
| Al | -5.56810327 | 2.41229686  | -0.89733449 |

### **B<sup>I</sup>\_AlH·NMe<sub>3</sub>**

E: -1835.38714633 ; H: -1834.877680 ; G: -1835.042137

|    |             |             |             |
|----|-------------|-------------|-------------|
| O  | -0.94585581 | 0.75182696  | 3.39480248  |
| Si | -0.65243145 | 0.88988623  | 1.79282571  |
| O  | 0.74229851  | 1.75279411  | 1.57843382  |
| Si | 1.89147566  | 2.06727735  | 0.44046371  |
| O  | 3.24017603  | 2.62619925  | 1.16730783  |
| O  | -0.46492098 | -0.62320675 | 1.17264766  |
| Si | -0.67934715 | -1.49056096 | -0.21666440 |
| O  | -0.85405859 | -3.06718330 | 0.18283196  |
| O  | -1.88940148 | 1.63563991  | 1.01193425  |
| Si | -2.45259807 | 3.13966024  | 0.59408906  |
| O  | -1.20481210 | 4.00466900  | -0.10964884 |
| Si | -0.11988724 | 3.61749351  | -1.28254939 |
| O  | -0.76085741 | 2.30632383  | -2.08636855 |
| Si | -0.23796754 | 1.28666940  | -3.28866273 |
| O  | 1.24120131  | 0.66959581  | -2.87002960 |
| Si | 1.82513720  | -0.27258562 | -1.64222411 |
| O  | 2.26895715  | 0.67826750  | -0.37491725 |
| O  | 0.65967678  | -1.34250049 | -1.17392527 |
| O  | -1.99818665 | -0.95679455 | -1.02116877 |
| Si | -2.61316126 | -0.46207784 | -2.48410577 |
| O  | -1.34716023 | 0.09040463  | -3.42392195 |
| O  | 3.13247247  | -1.09942384 | -2.16230846 |
| O  | -2.84187908 | 3.95055547  | 1.97536401  |

|    |             |             |             |
|----|-------------|-------------|-------------|
| O  | -3.71241106 | 2.98346108  | -0.39911898 |
| O  | 1.33111072  | 3.20022191  | -0.62053441 |
| O  | -3.24490745 | -1.77307259 | -3.25370738 |
| O  | 0.15055668  | 4.86544740  | -2.29845979 |
| O  | -0.06233580 | 2.10615495  | -4.69239430 |
| Si | -2.32939118 | 5.39089113  | 2.68199460  |
| Si | -2.70768667 | -3.33570396 | -3.56567331 |
| Si | -0.66950302 | 5.60262098  | -3.57864197 |
| Si | 1.22232360  | 2.43840719  | -5.73963337 |
| Si | -1.74210049 | 1.63085338  | 4.59252296  |
| Si | -0.79867174 | -3.95904515 | 1.61293055  |
| H  | -0.97984606 | -5.38651429 | 1.22585578  |
| H  | 0.52157434  | -3.76672734 | 2.28181287  |
| H  | -1.89928359 | -3.52432501 | 2.52200966  |
| H  | -3.20933113 | 1.63260329  | 4.32747976  |
| H  | -1.44579293 | 0.94965484  | 5.88409962  |
| H  | -1.22560438 | 3.03195643  | 4.61836467  |
| H  | 2.26314153  | 3.22573520  | -5.01755605 |
| H  | 1.79858757  | 1.15844412  | -6.24525325 |
| H  | 0.65310380  | 3.23298820  | -6.86390879 |
| H  | -0.70076667 | 7.06761942  | -3.30641294 |
| H  | 0.08877351  | 5.33178485  | -4.83474433 |
| H  | -2.05203648 | 5.05128409  | -3.67397060 |
| H  | -3.06125906 | 5.50969395  | 3.97638494  |
| H  | -0.85770101 | 5.35289645  | 2.92755619  |
| H  | -2.67043110 | 6.54355778  | 1.79596350  |
| H  | -3.45989055 | -4.28920441 | -2.69814475 |
| H  | -2.97803888 | -3.63635727 | -5.00166739 |
| H  | -1.24392932 | -3.44314488 | -3.28600185 |
| O  | -3.74419735 | 0.66222886  | -2.27033283 |
| Si | 3.39677111  | -2.66685025 | -2.73336797 |
| H  | 4.77503743  | -2.68461788 | -3.29734583 |
| H  | 3.28120225  | -3.63532680 | -1.60513599 |
| H  | 2.39545146  | -2.99140395 | -3.79186186 |
| Si | 4.85140977  | 2.12841713  | 1.25183174  |
| H  | 5.57678909  | 3.17670177  | 2.02279391  |
| H  | 4.93325256  | 0.81516942  | 1.95502920  |
| H  | 5.41579286  | 2.00887708  | -0.12405573 |
| H  | -4.01720538 | 3.34201408  | -3.20445059 |
| Al | -4.15128819 | 2.34289058  | -1.97960297 |
| N  | -6.14025022 | 2.11131821  | -1.67884059 |
| C  | -6.74452993 | 1.56103423  | -2.91031254 |
| H  | -6.57348185 | 2.25013650  | -3.73940105 |
| H  | -6.27617519 | 0.60380964  | -3.14034302 |
| H  | -7.82197692 | 1.42063415  | -2.77357298 |
| C  | -6.73729671 | 3.42436702  | -1.36119722 |
| H  | -7.81598119 | 3.32201280  | -1.20156823 |
| H  | -6.27037854 | 3.82205995  | -0.45978004 |
| H  | -6.55947610 | 4.11499831  | -2.18748369 |
| C  | -6.35052276 | 1.17540934  | -0.55347897 |
| H  | -7.42172166 | 1.02939612  | -0.37839449 |
| H  | -5.88371756 | 0.21961823  | -0.79103446 |
| H  | -5.88437306 | 1.58404860  | 0.34300955  |
